# Supplementary material for: Multimorbidity patterns of chronic conditions and geriatric syndromes in older patients from the MoPIM multicentre cohort study
Source: PubMed Central journal article supplement — BMJ Open. 2021 Nov 15;11(11):e049334. doi: 10.1136/bmjopen-2021-049334 (PMC8593730; doi:10.1136/bmjopen-2021-049334), 2021-11-15
Supplement: bmjopen-2021-049334.draft_revisions.pdf [file bmjopen-2021-049334.draft_revisions.pdf]

# BMJ Open

BMJ Open is committed to open peer review. As part of this commitment we make the peer review history of every article we publish publicly available.

When an article is published we post the peer reviewers' comments and the authors' responses online. We also post the versions of the paper that were used during peer review. These are the versions that the peer review comments apply to.

The versions of the paper that follow are the versions that were submitted during the peer review process. They are not the versions of record or the final published versions. They should not be cited or distributed as the published version of this manuscript.

BMJ Open is an open access journal and the full, final, typeset and author-corrected version of record of the manuscript is available on our site with no access controls, subscription charges or pay-per-view fees (<http://bmjopen.bmj.com>).

If you have any questions on BMJ Open's open peer review process please email [info.bmjopen@bmj.com](mailto:info.bmjopen@bmj.com)

# BMJ Open

## Multimorbidity patterns of chronic conditions and geriatric syndromes in older patients from the MoPIM multicentre cohort study.

|                               |                                                                                                                                                                                                                                                                                                                                                                                                                                                                                                                                                                                                                                                                                                                                                                                                               |
|-------------------------------|---------------------------------------------------------------------------------------------------------------------------------------------------------------------------------------------------------------------------------------------------------------------------------------------------------------------------------------------------------------------------------------------------------------------------------------------------------------------------------------------------------------------------------------------------------------------------------------------------------------------------------------------------------------------------------------------------------------------------------------------------------------------------------------------------------------|
| Journal:                      | <i>BMJ Open</i>                                                                                                                                                                                                                                                                                                                                                                                                                                                                                                                                                                                                                                                                                                                                                                                               |
| Manuscript ID                 | bmjopen-2021-049334                                                                                                                                                                                                                                                                                                                                                                                                                                                                                                                                                                                                                                                                                                                                                                                           |
| Article Type:                 | Original research                                                                                                                                                                                                                                                                                                                                                                                                                                                                                                                                                                                                                                                                                                                                                                                             |
| Date Submitted by the Author: | 23-Jan-2021                                                                                                                                                                                                                                                                                                                                                                                                                                                                                                                                                                                                                                                                                                                                                                                                   |
| Complete List of Authors:     | Baré, Marisa; Consorci Corporació Sanitària Parc Taulí, Clinical Epidemiology and Cancer Screening; REDISSEC<br>Herranz, Susana; Consorci Corporació Sanitària Parc Taulí, Acute care Geriatric Unit<br>Roso-Llorach, Albert; IDIAP Jordi Gol; Universitat Autònoma de Barcelona<br>Jordana, Rosa; Consorci Corporació Sanitària Parc Taulí, Internal Medicine<br>Violán, Concepción; IDIAP Jordi Gol<br>Lleal, Marina; Consorci Corporació Sanitària Parc Taulí, Clinical Epidemiology and Cancer Screening<br>Roura-Poch, Pere; Consorci Hospitalari de Vic, Epidemiology; REDISSEC<br>Arellano, Marta; Consorci Parc de Salut MAR de Barcelona, Geriatrics<br>Estrada, Rafael; Hospital Galdakao-Usansolo, Internal Medicine<br>Nazco, Gloria Julia; Hospital Universitario de Canarias, Hospital Pharmacy |
| Keywords:                     | INTERNAL MEDICINE, STATISTICS & RESEARCH METHODS, GERIATRIC MEDICINE, Quality in health care < HEALTH SERVICES ADMINISTRATION & MANAGEMENT                                                                                                                                                                                                                                                                                                                                                                                                                                                                                                                                                                                                                                                                    |
|                               |                                                                                                                                                                                                                                                                                                                                                                                                                                                                                                                                                                                                                                                                                                                                                                                                               |

SCHOLARONE™  
Manuscripts

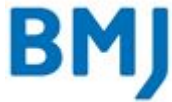

I, the Submitting Author has the right to grant and does grant on behalf of all authors of the Work (as defined in the below author licence), an exclusive licence and/or a non-exclusive licence for contributions from authors who are: i) UK Crown employees; ii) where BMJ has agreed a CC-BY licence shall apply, and/or iii) in accordance with the terms applicable for US Federal Government officers or employees acting as part of their official duties; on a worldwide, perpetual, irrevocable, royalty-free basis to BMJ Publishing Group Ltd ("BMJ") its licensees and where the relevant Journal is co-owned by BMJ to the co-owners of the Journal, to publish the Work in this journal and any other BMJ products and to exploit all rights, as set out in our [licence](#).

The Submitting Author accepts and understands that any supply made under these terms is made by BMJ to the Submitting Author unless you are acting as an employee on behalf of your employer or a postgraduate student of an affiliated institution which is paying any applicable article publishing charge ("APC") for Open Access articles. Where the Submitting Author wishes to make the Work available on an Open Access basis (and intends to pay the relevant APC), the terms of reuse of such Open Access shall be governed by a Creative Commons licence – details of these licences and which [Creative Commons](#) licence will apply to this Work are set out in our licence referred to above.

Other than as permitted in any relevant BMJ Author's Self Archiving Policies, I confirm this Work has not been accepted for publication elsewhere, is not being considered for publication elsewhere and does not duplicate material already published. I confirm all authors consent to publication of this Work and authorise the granting of this licence.

1  
2  
3 1 **MULTIMORBIDITY PATTERNS OF CHRONIC CONDITIONS AND GERIATRIC**  
4 **SYNDROMES IN OLDER PATIENTS FROM THE MoPIM MULTICENTRE**  
5 **2**  
6 **3**  
7 **COHORT STUDY.**

8  
9 4 Marisa Baré<sup>1,2,\*</sup>, Susana Herranz<sup>3</sup>, Albert Roso-Llorach<sup>4,5</sup>, Rosa Jordana<sup>6</sup>,  
10  
11 5 Concepción Violán<sup>4</sup>, Marina Lleal<sup>1</sup>, Pere Roura-Poch<sup>7,2</sup>, Marta Arellano<sup>8</sup>, Rafael  
12  
13 6 Estrada<sup>9</sup>, Gloria Julia Nazco<sup>10</sup>, on behalf of the MoPIM study group.

- 14  
15 7 1. Clinical Epidemiology and Cancer Screening Department, Consorci  
16  
17 8 Corporació Sanitària Parc Taulí, Sabadell, Spain  
18  
19 9 2. Health Services Research on Chronic Patients Network (REDISSEC),  
20  
21 10 Spain  
22  
23 11 3. Acute Care Geriatric Unit, Consorci Corporació Sanitària Parc Taulí,  
24  
25 12 Sabadell, Spain  
26  
27 13 4. Institut Universitari d'Investigació en Atenció Primària Jordi Gol (IDIAP  
28  
29 14 Jordi Gol), Barcelona, Spain.  
30  
31 15 5. Universitat Autònoma de Barcelona, Cerdanyola del Vallès, Spain.  
32  
33 16 6. Internal Medicine Department, Consorci Corporació Sanitària Parc Taulí,  
34  
35 17 Sabadell, Spain  
36  
37 18 7. Epidemiology Department, Consorci Hospitalari de Vic, Vic, Spain  
38  
39 19 8. Geriatrics Department, Consorci Parc de Salut MAR, Barcelona, Spain  
40  
41 20 9. Internal Medicine Department, Hospital Galdakao-Usansolo, Galdacano,  
42  
43 21 Spain  
44  
45 22 10. Pharmacy Department, Hospital Universitario de Canarias, La Laguna,  
46  
47 23 Spain

48  
49  
50  
51  
52  
53  
54  
55  
56  
57  
58  
59  
60  
24 \* **Corresponding author: Marisa Baré, MD, MPH, PhD**

25 Clinical Epidemiology and Cancer Screening  
26 Corporació Sanitària Parc Taulí  
27 Parc Taulí 1, 08208 Sabadell, Spain  
28 phone: 0034 937458245  
29 e-mail: [mbare@tauli.cat](mailto:mbare@tauli.cat)

30 Word count: 3647 words

1  
2  
3 31 **ABSTRACT**  
4  
5

6 32 **Objectives:** To estimate the frequency of chronic conditions and geriatric  
7  
8 33 syndromes in older patients admitted to hospital because of an exacerbation of  
9  
10 34 their chronic conditions, and to identify multimorbidity clusters in these patients.  
11  
12

13  
14 35 **Design:** Multicentre, prospective cohort study.  
15  
16

17 36 **Setting:** Internal medicine or geriatric services of five general teaching hospitals  
18  
19 37 in Spain.  
20  
21

22 38 **Participants:** 740 patients aged 65 and older, hospitalized because of an  
23  
24 39 exacerbation of their chronic conditions between September 2016 and December  
25  
26 40 2018.  
27  
28

29  
30 41 **Primary and secondary outcome measures:** Active chronic conditions and  
31  
32 42 geriatric syndromes (including risk factors) of the patient, a score about clinical  
33  
34 43 management of chronic conditions during admission, and destination at  
35  
36 44 discharge were collected, among other variables. Multimorbidity patterns were  
37  
38 45 identified using fuzzy c-means cluster analysis, taking into account the clinical  
39  
40 46 management score. Prevalence, observed/expected ratio and exclusivity of each  
41  
42 47 chronic condition and geriatric syndrome were calculated for each cluster, and  
43  
44 48 the final solution was approved after clinical revision and discussion among the  
45  
46 49 research team.  
47  
48

49  
50 50 **Results:** 740 patients were included (mean age 84.12 years, SD 7.01; 53.24%  
51  
52 51 female). Almost all patients had two or more chronic conditions (98.65%; 95%CI  
53  
54 52 98.23-99.07), the most frequent were hypertension (81.49%, 95%CI 78.53-84.12)  
55  
56 53 and heart failure (59.86%, 95%CI 56.29-63.34). The most prevalent geriatric  
57  
58  
59  
60

1  
2  
3 54 syndrome was polypharmacy (79.86%, 95%CI 76.82-82.60). Four statistically  
4  
5 55 and clinically significant multimorbidity clusters were identified: osteoarticular,  
6  
7 56 psychogeriatric, cardiorespiratory and minor chronic disease. Patient level  
8  
9 57 variables such as sex, Barthel Index, number of chronic conditions or geriatric  
10  
11 58 syndromes, chronic disease exacerbation 3 months prior to admission or  
12  
13 59 destination at discharge differed between clusters.  
14  
15  
16

17  
18 **Conclusions:** In older patients admitted to hospital because of the exacerbation  
19  
20 61 of chronic health problems, it is possible to define multimorbidity clusters using  
21  
22 62 soft clustering techniques. These clusters are clinically relevant and could be the  
23  
24 63 basis to reorganize healthcare circuits or processes to tackle the increasing  
25  
26 64 number of older, multimorbid patients.  
27  
28  
29

30  
31 65 **Trial registration number** NCT02830425, 12<sup>th</sup> July 2016  
32  
33

34 66 **Keywords:** Multimorbidity, patterns, soft clustering, older, chronic conditions,  
35  
36 67 geriatric syndromes.  
37  
38

### 39 68 **Strengths and limitations of this study**

- 40  
41  
42 69 - The multimorbidity analysis in this study has been developed from a  
43  
44 70 patient-centred point of view, considering a wide range of long-term  
45  
46 71 conditions that may require healthcare in older people.  
47  
48 72 - To the best of our knowledge, this is the first published study of  
49  
50 73 multimorbidity clusters in older patients to include chronic diseases  
51  
52 74 weighted by a clinical management score and geriatric syndromes.  
53  
54 75 - Soft clustering is an innovative, methodologically robust technique that can  
55  
56 76 lead to reliable results in the field of multimorbidity analysis.  
57  
58  
59  
60

1  
2  
3 77 - The list of chronic conditions and geriatric syndromes used in this study is  
4  
5 78 comprehensive but not standardized, thus hindering comparability with  
6  
7 79 other studies.  
8  
9

## 10 **BACKGROUND**

11  
12  
13  
14 81 According to the most recent Eurostat baseline population projections, old-age  
15  
16 82 dependency ratio (population 65y and over divided by population 15-64y) is about  
17  
18 83 32% in the European Union (EU) and it is expected to reach 52% in 2050,  
19  
20  
21 84 meaning that the EU's population will continue to grow older[1]. Together with  
22  
23 85 the fact that chronic conditions (CC) are the main cause of disability and mortality  
24  
25 86 in Europe, this implies that the coexistence of two or more chronic health  
26  
27 87 conditions, which constitutes the classic definition of multimorbidity, is becoming  
28  
29  
30 88 increasingly common[2].  
31  
32

33  
34 89 Multimorbidity is therefore turning into an important challenge for the health  
35  
36 90 system because of the expanding proportion of older people with multiple CC and  
37  
38 91 treatments as well as the difficulties associated with their clinical  
39  
40 92 management[3,4]. Most clinical practice guidelines are focused on single  
41  
42 93 diseases, with limited recommendations for multimorbid patients[5], and, in  
43  
44 94 addition, randomized clinical trials often exclude older patients with  
45  
46 95 multimorbidity[6]. Despite the importance of multimorbidity in clinical practice,  
47  
48 96 different methodological approaches are still under debate and there is no gold  
49  
50 97 standard, which makes it difficult to compare different estimations around the  
51  
52 98 world[7–9].  
53  
54  
55

56  
57 99 One of the novel, increasingly widespread definitions of multimorbidity considers  
58  
59 100 the non-spurious association of certain CC by sharing pathophysiological

1  
2  
3 101 mechanisms, giving rise to disease association patterns or clusters[10]. Other  
4  
5 102 clinically relevant situations such as geriatric syndromes (GS) may also be  
6  
7 103 considered in the definition of these patterns, since they might have a great  
8  
9 104 impact on the health-related quality of life and clinical management of old  
10  
11 105 patients[11]. In fact, the purpose of multimorbidity characterization (i.e., predicting  
12  
13 106 outcomes or use of health services, improving quality of care, organizing  
14  
15 107 healthcare services, etc.), will have an influence on its definition. From a patient-  
16  
17 108 centred point of view, a global consideration of all conditions that may require  
18  
19 109 healthcare attention is necessary, even if they are not the reason for  
20  
21 110 hospitalization. Along these lines, some countries have explicitly recommended  
22  
23 111 to acknowledge all long-term conditions for optimising care of adult patients by  
24  
25 112 reducing, for example, possible inappropriate treatments, multiple healthcare  
26  
27 113 appointments or poor health-related quality of life[12–14].  
28  
29  
30  
31  
32  
33

34 114 During the past decade, there has been an increasing amount of publications that  
35  
36 115 consider multimorbidity[15], but few have focused on multimorbidity patterns in  
37  
38 116 older patients and even fewer take into account GS[16]. For this reason, we  
39  
40 117 launched a multicentre study in 2016 with multiple aims related to multimorbidity,  
41  
42 118 appropriateness of chronic treatments and adverse drug reactions in older  
43  
44 119 patients[17]. The objectives of the present analyses were to estimate the  
45  
46 120 frequency of CC and GS in older patients admitted to hospital because of an  
47  
48 121 exacerbation of their CC, and to identify possible multimorbidity patterns in these  
49  
50 122 patients.  
51  
52  
53  
54

## 55 123 **METHODS**

### 56 124 **Design and setting**



1  
2  
3 125 A multicentre, prospective cohort study including older patients hospitalized at  
4  
5 126 the internal medicine or geriatric services at five general teaching hospitals in  
6  
7 127 three different regions of Spain between September 2016 and December 2018  
8  
9 128 was designed. The detailed protocol was previously published[17].  
10  
11  
12

13 129 For the purposes of the study, older patients ( $\geq 65$  years old) admitted as a result  
14  
15 130 of the exacerbation of their chronic pathology were included. Patients referred to  
16  
17 131 home hospitalization, admitted because of an acute process not related to any  
18  
19 132 chronic disease, or with a fatal outcome expected at the time of admission were  
20  
21 133 not included.  
22  
23  
24

25  
26 134 No written informed consent was deemed necessary for this study.  
27  
28

### 29 135 **Data acquisition and variables**

30  
31

32 136 The following sociodemographic and clinical data was retrieved by the clinical  
33  
34 137 team responsible for the patient: patient's code, date of birth, sex, functional  
35  
36 138 status just before entering the hospital (Barthel index)[18], household (alone, with  
37  
38 139 relatives or other people, in a nursing home), existence of any contact with  
39  
40 140 healthcare services (primary care, emergencies, hospital admission, outpatient  
41  
42 141 care, home care) in the 3 months prior to hospitalization due to exacerbation of  
43  
44 142 any chronic disease, and destination at discharge from the present episode of  
45  
46 143 hospitalization (home, transfer to another hospital, transfer to a nursing home,  
47  
48 144 *exitus*).  
49  
50  
51  
52

53  
54 145 Active CC of the patient at arrival to hospital, including some risk factors, were  
55  
56 146 collected (see Supplemental Table 1). For this purpose, the physicians of the  
57  
58 147 project defined, on a consensual basis, a limited list of 64 CC, coming from the  
59  
60

1  
2  
3 148 114 groups defined by Salisbury and colleagues[19] and including the 19  
4  
5 149 categories of the Charlson Index[20]. Following the same criteria as Salisbury, a  
6  
7 150 condition was considered to be chronic when it lasted for at least 6 months,  
8  
9 151 including past conditions that require ongoing disease or risk management,  
10  
11 152 important conditions with a significant risk of recurrence, or past conditions that  
12  
13 153 have continuing implications for patient management[19]. Drug-related conditions  
14  
15 154 of this list refer to poor management of medication related to a chronic disease  
16  
17 155 that has clinical implications in that hospitalization (such as any drug intolerance  
18  
19 156 or an excess drug poisoning).

20  
21  
22  
23  
24 157 Additionally, for each of the CC, it was also recorded if they had required clinical  
25  
26 158 management (both at admission and during hospitalization) by assigning a  
27  
28 159 (subjective) correlative score (CM=1, 2, 3...) to each one, according to their  
29  
30 160 clinical importance during the attention process. Thus, CC that did not have any  
31  
32 161 significance during hospitalization, although recorded, had a score equal to zero.

33  
34  
35  
36  
37 162 Specific GS and risk factors (acute confusional syndrome/delirium, chronic pain,  
38  
39 163 cognitive/intellectual impairment, constipation, depression or anxiety, dysphagia,  
40  
41 164 frailty, immobility, incontinence (urinary/faecal), instability/falls, malnutrition,  
42  
43 165 polypharmacy, pressure ulcers, sensorial deficit, sleep disorders/insomnia) were  
44  
45 166 also recorded. Two of the departments systematically apply a recently developed  
46  
47 167 scale for frailty [21], while the others consider clinical judgement (although based  
48  
49 168 on the same variables).

50  
51  
52  
53  
54 169 In order to address potential sources of bias, a pilot study was conducted with  
55  
56 170 the first 10 admissions per centre to validate the data collection process and  
57  
58 171 identify problems that could arise. After that, proper changes were made in the  
59  
60

1  
2  
3 172 protocol and questionnaire. All available information sources were consulted in  
4  
5 173 order to register CC and GS, and the defined list was not closed. Nonetheless,  
6  
7 174 the registration of CC and GS was based on clinical criteria.  
8  
9

### 10 175 **Sampling and analysis**

11  
12  
13  
14 176 A consecutive sample of 740 patients meeting the inclusion criteria were  
15  
16 177 included, proportionally distributed to the annual volume of hospitalizations of the  
17  
18 178 medicine and/or geriatric services of each centre. The estimated sample of 800  
19  
20 179 patients (see protocol[17]) could not be reached due to organizational reasons in  
21  
22 180 one of the participating centres.  
23  
24  
25

26 181 For the purposes of the analyses, some CC were grouped according to clinical  
27  
28 182 criteria: Hemiplegia was included in cerebrovascular disease; metastatic solid  
29  
30 183 tumour, leukaemia, lymphoma and any malignancy were grouped into  
31  
32 184 'neoplasia'; hepatitis B and C were included in mild liver disease, and both  
33  
34 185 congestive and non-congestive heart failure were grouped into 'heart failure'.  
35  
36 186 Other diseases were finally excluded of the analyses considering that they have  
37  
38 187 no impact on acute healthcare (cataract, dermatitis, diverticular disease of the  
39  
40 188 colon, glaucoma, haemorrhoids, other vascular diseases and prostatic benign  
41  
42 189 hypertrophy). In the end, 51 CC and 15 GS were analysed.  
43  
44  
45  
46  
47

48 190 The updated Charlson Comorbidity Index[22], age adjusted, was computed and  
49  
50 191 categorized according to tertiles distribution.  
51  
52

53 192 Descriptive statistics were performed to assess patient clinical and  
54  
55 193 sociodemographic characteristics and to obtain overall prevalence estimates of  
56  
57 194 CC and GS, stratified by sex. Multimorbidity was firstly defined as the presence  
58  
59  
60

1  
2  
3 195 of two or more CC. Cumulative number of CC and GS per patient were computed,  
4  
5 196 respectively.

6  
7  
8 197 *Multimorbidity patterns*

9  
10  
11 198 CC or GS with a prevalence <2% were excluded to avoid statistical noise and  
12  
13 199 therefore spurious findings in the cluster solutions, leaving a list of 40 CC and 15  
14  
15 200 GS. In order to take into account if a CC had required clinical management (CM),  
16  
17 201 a ratio variable (R) was computed as follows:

18  
19  
20  
21  
22 202 If  $CC=0$  &  $CM=0 \rightarrow R=0$

23  
24  
25 203 If  $CC=1$  &  $CM=m \rightarrow R=1/m$ ;  $\max(m) = \max(\text{value}(CM)) = 8$ ;

26  
27  
28 204 If  $CC=1$  &  $CM=0 \rightarrow R=0.1$

29  
30  
31 205 All patients were included, without regard to having multimorbidity, so as to obtain  
32  
33 206 clusters that were more representative. Data for the analysis comprised the ratio  
34  
35 207 (R) and syndrome (GS) variables.

36  
37  
38  
39 208 Multimorbidity patterns were identified using the fuzzy c-means cluster analysis  
40  
41 209 algorithm, which belongs to the family of *soft* clustering algorithms. The algorithm  
42  
43 210 estimates  $c$  cluster centres (similar to  $k$ -means) but with fuzziness so that  
44  
45 211 individuals may belong to more than one pattern. Through this technique, we  
46  
47 212 obtained clusters of individuals and a membership matrix, which indicates the  
48  
49 213 degree of participation of each subject in each cluster.

50  
51  
52  
53 214 As a first step, and similarly to Violán *et. al.*[23], the PCAmix algorithm for  
54  
55 215 categorical (GS) and continuous data (R) was implemented to reduce and  
56  
57 216 transform the dataset to all continuous data[24]. To decide the number of retained  
58  
59  
60

1  
2  
3 217 dimensions, the Karlis-Saporta-Spinaki rule was used[25]. Then, a soft clustering  
4  
5 218 algorithm was applied to fuzzily distribute the population into a set of clusters,  
6  
7 219 corresponding to the different multimorbidity patterns. We computed three  
8  
9 220 validation indices to obtain the optimal number of clusters ( $K$ ) and the optimal  
10  
11 221 value of the fuzziness parameter ( $m$ ): the partition coefficient whose optimal  
12  
13 222 choice for coefficient is at the maximum, and the Xie-Beni and the partition  
14  
15 223 entropy validation indices, whose optimal indices are at the minimum[26].  
16  
17 224 Considering the stochastic nature of the clusters, and the requirement of stable  
18  
19 225 multimorbidity clusters, 100 independent clustering repetitions were applied to  
20  
21 226 obtain the stable final solution.  
22  
23  
24  
25  
26  
27 227 To characterize the multimorbidity patterns corresponding to each cluster of  
28  
29 228 individuals, the prevalence of CC and GS in each cluster was calculated.  
30  
31 229 Observed/expected (O/E) ratios were calculated by dividing the prevalence of a  
32  
33 230 given disease within a cluster by its prevalence in the overall population. The  
34  
35 231 exclusivity of CC and GS, defined as the fraction of patients with the disease in  
36  
37 232 the cluster over the total number of patients with the disease, was also calculated.  
38  
39  
40  
41 233 A disease or a syndrome was considered to be relevant in a given cluster of  
42  
43 234 individuals when its O/E ratio was  $>1$  and its exclusivity was  $>25\%$ [27–29]. The  
44  
45 235 statistical significant final solution ranged from 4 to 8 clusters. After clinical  
46  
47 236 revision and discussion among the research team, 4 different clusters were  
48  
49 237 considered to make clinical sense according to the objective of the clustering.  
50  
51  
52 238 There is currently no consensus in the literature on the criteria used to select the  
53  
54 239 number of clusters or the O/E ratio cut-off point due to, in part, the novelty of the  
55  
56 240 analysis.  
57  
58  
59  
60

241 Finally, sociodemographic and clinical variables were described for all patients  
 242 assigned to each cluster. Analyses were performed using R 3.6.0 and SPSS 22.

### 243 Patient and Public Involvement

244 Since this was an observational study with variables and outcomes related to the  
 245 healthcare process, this research was developed without patient involvement.  
 246 Patients were not invited to comment on the study design and were not consulted  
 247 to develop patient relevant outcomes or interpret the results.

## 248 RESULTS

249 740 patients aged 65 years or older were included, with a mean age of 84.12  
 250 years (SD 7.01), a 53.24% of females and a mean Barthel Index of 65.07 (median  
 251 75). Sociodemographic and clinical variables are summarised in Table 1. Almost  
 252 all patients had two or more CC (98.65%; 95%CI 98.23-99.07), with a median of  
 253 8 CC and 6 GS per patient. Nearly 70% had consulted a health care service in  
 254 the 3 months prior to hospitalization due to chronic disease exacerbation.

255 Table 1. Sociodemographic and clinical variables of the studied cohort.

| Sociodemographic and clinical variables |        | N   | %     | 95% CI        |
|-----------------------------------------|--------|-----|-------|---------------|
| Age                                     | < 70   | 33  | 4.46  | 3.19 - 6.20   |
|                                         | 70-74  | 48  | 6.49  | 4.93 - 8.50   |
|                                         | 75-79  | 82  | 11.08 | 9.02 - 13.55  |
|                                         | 80-84  | 181 | 24.46 | 21.50 - 27.68 |
|                                         | 85-89  | 232 | 31.35 | 28.11 - 34.78 |
|                                         | 90-94  | 134 | 18.11 | 15.50 - 21.05 |
|                                         | >= 95  | 30  | 4.05  | 2.85 - 5.73   |
| Sex                                     | Female | 394 | 53.24 | 49.64 - 56.81 |
|                                         | Male   | 346 | 46.76 | 43.19 - 50.36 |
| Barthel index                           | < 20   | 90  | 12.16 | 10.00 - 14.71 |
|                                         | 20-35  | 76  | 10.27 | 8.28 - 12.67  |
|                                         | 40-55  | 124 | 16.76 | 14.24 - 19.62 |
|                                         | 60-95  | 294 | 39.73 | 36.27 - 43.30 |
|                                         | 100    | 156 | 21.08 | 18.30 - 24.17 |
| Age adjusted, updated Charlson          | 2-5    | 148 | 20.00 | 17.28 - 23.03 |

| Sociodemographic and clinical variables                     |                             | N   | %     | 95% CI        |
|-------------------------------------------------------------|-----------------------------|-----|-------|---------------|
| Comorbidity Index                                           | 6-8                         | 411 | 55.54 | 51.94 - 59.08 |
|                                                             | 9-14                        | 181 | 24.46 | 21.50 - 27.68 |
| Household                                                   | With relatives/other people | 523 | 70.68 | 67.30 - 73.84 |
|                                                             | Nursing home                | 95  | 12.84 | 10.62 - 15.44 |
|                                                             | Alone                       | 122 | 16.49 | 13.99 - 19.33 |
| Chronic disease exacerbation<br>3 months prior to admission | No                          | 225 | 30.41 | 27.20 - 33.81 |
|                                                             | Yes (total)                 | 515 | 69.59 | 66.19 - 72.80 |
|                                                             | Primary care                | 342 | 46.22 | 42.65 - 49.82 |
|                                                             | Emergencies                 | 263 | 35.54 | 32.17 - 39.06 |
|                                                             | Hospital admission          | 193 | 26.08 | 23.05 - 29.36 |
|                                                             | Outpatient care             | 8   | 1.08  | 0.55 - 2.12   |
| Destination at discharge                                    | Home                        | 468 | 63.24 | 59.71 - 66.64 |
|                                                             | Nursing home                | 105 | 14.19 | 11.86 - 16.89 |
|                                                             | Another hospital            | 101 | 13.65 | 11.36 - 16.31 |
|                                                             | Exitus                      | 66  | 8.92  | 7.07 - 11.19  |
| Multimorbidity                                              | No                          | 10  | 1.35  | 1.35 - 1.36   |
|                                                             | Yes                         | 730 | 98.65 | 98.23 - 99.07 |

256 CI = Confidence interval

257 Figure 1 shows the distribution of the number of CC by age groups. The most  
 258 frequent CC were hypertension (81.49%, 95%CI 78.53-84.12) and heart failure  
 259 (59.86%, 95%CI 56.29-63.34) (see Supplemental Table 2). Heart failure was also  
 260 the main cause of hospitalization (30.7% of patients had CM score=1), followed  
 261 by COPD (20.7%) (Supplemental Table 3).

262 There were some differences in CC between sexes, with females having more  
 263 frequently heart failure, degenerative arthropathy, obesity, hip fracture, thyroid  
 264 disease, asthma, osteoporosis, vertigo and non-schizophrenic mental disorders.  
 265 Males, in turn, had more frequently COPD, gout, neoplasia, peripheral  
 266 arteriopathy and ulcerative disease.

267 The most prevalent GS was polypharmacy (79.86%, 95%CI 76.82-82.60),  
 268 followed by frailty (61.76%, 95%CI 58.20-65.19). Females had a significantly  
 269 higher number of GS compared to males (Wilcoxon rank sum test,  $p < 0.001$ ), as

270 well as a higher prevalence of depression/anxiety, chronic pain, constipation,  
271 frailty, urinary/faecal incontinence and immobility.

272 Four statistically and clinically significant multimorbidity clusters or patterns were  
273 identified in our study population. For all clusters, CC and GS with an  
274 observed/expected ratio >1 and exclusivity >25% are represented in Figure 2  
275 (see also Supplemental Table 4). Sociodemographic and clinical characteristics  
276 of patients in each cluster are described in Table 2.

277 Table 2. Sociodemographic and clinical variables of the multimorbidity clusters.

|                                                                           |                               | Osteoarticular    | Psycho-geriatric  | Minor chronic conditions | Cardio-respiratory |
|---------------------------------------------------------------------------|-------------------------------|-------------------|-------------------|--------------------------|--------------------|
| Number of patients included, n (%)                                        |                               | 132 (17.8)        | 153 (20.7)        | 179 (24.2)               | 276 (37.3)         |
| Age at admission (y, mean $\pm$ SD)                                       |                               | 84.03 $\pm$ 6.48  | 84.51 $\pm$ 7.25  | 83.94 $\pm$ 7.19         | 84.06 $\pm$ 7.03   |
| Sex, n (%)                                                                | Male                          | 34 (25.7)         | 66 (42.8)         | 99 (55.5)                | 147 (53.4)         |
|                                                                           | Female                        | 98 (74.3)         | 87 (57.2)         | 80 (44.5)                | 129 (46.6)         |
| Barthel Index (mean $\pm$ SD)                                             |                               | 63.06 $\pm$ 24.78 | 47.62 $\pm$ 34.94 | 64.96 $\pm$ 33.56        | 75.76 $\pm$ 27.52  |
| Total n° chronic conditions (mean $\pm$ SD)                               |                               | 11.5 $\pm$ 3.64   | 7.68 $\pm$ 3.19   | 8.86 $\pm$ 3.08          | 7.59 $\pm$ 2.61    |
| Total n° geriatric syndromes / risk factors (mean $\pm$ SD)               |                               | 7.76 $\pm$ 2.07   | 8.16 $\pm$ 2.82   | 6.4 $\pm$ 3.32           | 4.42 $\pm$ 2       |
| Charlson Comorbidity Index, n (%)                                         | 2-5                           | 26 (19.9)         | 24 (15.6)         | 37 (20.4)                | 61 (22.2)          |
|                                                                           | 6-8                           | 73 (55.1)         | 89 (58.5)         | 96 (53.8)                | 153 (55.3)         |
|                                                                           | 9-14                          | 33 (25.0)         | 40 (25.9)         | 46 (25.7)                | 62 (22.6)          |
| Household, n (%)                                                          | With relatives / other people | 91 (68.7)         | 103 (67.2)        | 133 (74.5)               | 196 (71.1)         |
|                                                                           | Nursing home                  | 16 (11.8)         | 28 (18.4)         | 23 (12.8)                | 28 (10.3)          |
|                                                                           | Alone                         | 26 (19.5)         | 22 (14.3)         | 23 (12.7)                | 52 (18.7)          |
| Chronic disease exacerbation 3 months prior to the index admission, n (%) | No                            | 24 (18.3)         | 46 (30.1)         | 48 (27.0)                | 106 (38.5)         |
|                                                                           | Yes (total)                   | 108 (81.7)        | 107 (69.9)        | 130 (73.0)               | 170 (61.5)         |
|                                                                           | Primary care                  | 83 (62.7)         | 66 (43.3)         | 92 (51.6)                | 101 (36.5)         |
|                                                                           | Emergencies                   | 71 (53.6)         | 40 (26.2)         | 69 (38.5)                | 83 (30.2)          |
|                                                                           | Hospital admission            | 49 (37.1)         | 46 (30.1)         | 47 (26.1)                | 51 (18.6)          |
|                                                                           | Outpatient care               | 1 (0.7)           | 0 (0.3)           | 3 (1.4)                  | 4 (1.4)            |
| Destination at discharge, n (%)                                           | Home                          | 86 (65.3)         | 83 (54.0)         | 111 (62.0)               | 188 (68.1)         |
|                                                                           | Nursing home                  | 15 (11.1)         | 33 (21.3)         | 26 (14.5)                | 32 (11.5)          |
|                                                                           | Another hospital              | 15 (11.3)         | 17 (11.3)         | 26 (14.7)                | 42 (15.3)          |
|                                                                           | Exitus                        | 16 (12.3)         | 20 (13.3)         | 16 (8.8)                 | 14 (4.9)           |

278 SD = standard deviation.



1  
2  
3 279 The first cluster, named *osteoarticular*, included 132 patients (17.8%) having  
4  
5 280 osteoporosis, fractures, inflammatory osteoarticular disease, chronic pain and  
6  
7 281 degenerative arthropathy. Moreover, vertigo, sleep apnoea, asthma,  
8  
9  
10 282 depression/anxiety and sleep disorders were also over-represented. This cluster  
11  
12 283 included patients with the highest number of both CC and GS. About three  
13  
14 284 quarters were female, and most of them (82%) accessed healthcare services 3  
15  
16  
17 285 months prior to this admission.

18  
19  
20 286 Cluster 2, called *psychogeriatric*, had 152 patients (20.7%) and included mostly  
21  
22 287 GS: pressure ulcers, immobility, malnutrition, cognitive impairment, dementia,  
23  
24 288 incontinence and frailty. Patients in this group had a mean Barthel index lower  
25  
26  
27 289 than 50 and a high number of GS. Furthermore, nearly 20% of them were living  
28  
29 290 in a nursing home and in-hospital mortality was about 13%.

30  
31  
32 291 Cluster 3, named *minor chronic disease*, had 179 (24.2%) patients, and  
33  
34 292 represents a group of patients with a variety of conditions, such as hypertension,  
35  
36 293 dyslipidaemia, anaemia, gout, chronic renal insufficiency, polypharmacy, non-  
37  
38 294 ischaemic heart disease, and diverse GS. O/E ratios were close to 1 in most  
39  
40  
41 295 cases.

42  
43  
44 296 Finally, cluster 4, called *cardiorespiratory*, included 276 (37.3%) patients. The  
45  
46 297 over-represented diagnoses were COPD, heart failure and cardiac arrhythmia,  
47  
48 298 although the O/E ratios were very low. In this cluster, with the lowest number of  
49  
50  
51 299 CC and GS, and a Barthel index greater than 75, nearly 40% had no healthcare  
52  
53 300 consultation for a chronic disease exacerbation in the previous 3 months. This  
54  
55  
56 301 group had the lowest in-hospital mortality (5%).

57  
58  
59 302 **DISCUSSION**  
60

1  
2  
3 303 The present study aimed to identify multimorbidity patterns in patients aged 65  
4  
5 304 and above admitted to hospital because of an exacerbation of CC. The soft  
6  
7 305 clustering technique used, together with clinical criteria, was able to identify 4  
8  
9 306 different multimorbidity patterns, named osteoarticular, psychogeriatric, cardio-  
10  
11 307 respiratory and minor chronic disease, in a patient-centred approach taking into  
12  
13 308 account the importance of each disease in hospital management. Remarkably,  
14  
15 309 high chronic multimorbidity was found in all patients, regardless of the cluster. To  
16  
17 310 the best of our knowledge, this is the only study published to date that has  
18  
19 311 analysed multimorbidity patterns taking into account both CC (with their weight  
20  
21 312 during clinical management) and GS in this type of patients. Hence, these  
22  
23 313 identified patterns allow us to take a further step towards understanding the  
24  
25 314 patients' current or future healthcare needs.

26  
27  
28  
29  
30  
31 315 All clusters contain groups of conditions that make sense and are mostly  
32  
33 316 pathophysiologically related. From the clinical point of view, these clusters  
34  
35 317 resemble patient profiles that are intuitively perceived. Moreover, some  
36  
37 318 descriptive variables such as sex, Barthel index, mean number of CC or GS,  
38  
39 319 chronic pathology exacerbations in previous months, or hospital mortality, are  
40  
41 320 distributed in such a way that they may reinforce the distinction of these groups.

42  
43  
44  
45  
46 321 Coexistence of CC and GS was observed in all clusters except for the  
47  
48 322 cardiorespiratory, reinforcing the need to consider other clinically relevant  
49  
50 323 situations rather than only CC. In particular, the exclusivity and prevalence of GS  
51  
52 324 such as immobility, malnutrition, cognitive impairment or dementia were  
53  
54 325 considerable in the psychogeriatric cluster.

1  
2  
3 326 Interestingly, highly prevalent CC, such as heart failure and COPD, which also  
4  
5 327 frequently involve clinical management, only showed remarkable exclusivity and  
6  
7 328 O/E ratio in the cardiorespiratory pattern and were not over-represented  
8  
9  
10 329 elsewhere. This highlights the fact that even though some CC may not be over-  
11  
12 330 represented in a cluster, they can have a high prevalence and therefore need to  
13  
14 331 be properly addressed too.

16  
17  
18 332 With respect to the osteoarticular cluster, it displayed a pattern of female  
19  
20 333 predominance, with many CC and GS, high healthcare needs in recent months  
21  
22 334 due to their chronic pathology, and high in-hospital mortality. Thus, this profile  
23  
24 335 would identify a group of patients with a high probability of decompensation and  
25  
26 336 death.

27  
28  
29  
30 337 Finally, the so-called minor chronic diseases cluster was not very well defined. It  
31  
32 338 included some risk factors (hypertension, dyslipidaemia, polypharmacy) as well  
33  
34 339 as some CC and GS. Thus, it would be possible that it does not represent a real  
35  
36 340 cluster but either the set of cases that did not belong anywhere else.

37  
38  
39  
40 341 It should be noted that the type of analysis, the purpose for designing these  
41  
42 342 patterns and also their interpretation could all lead to different results or  
43  
44 343 conclusions. For instance, our aim in defining multimorbidity patterns in this  
45  
46 344 cohort was to identify profiles of patients with similar needs and even a similar  
47  
48 345 short-term prognosis at that time. For this reason, the importance of their  
49  
50 346 pathologies in the course of hospitalization was taken into account. Hence, the  
51  
52 347 ones that tend to have a minimal impact on clinical management, such as risk  
53  
54 348 factors like hypertension or dyslipidaemia did not have a leading role in the  
55  
56 349 patterns.  
57  
58  
59  
60

### 350 Comparison with other studies

351 Given the type of patients under study and the methodological approach to  
352 identify multimorbidity patterns, there are few publications to directly compare our  
353 results to. Clerencia-Sierra and colleagues[16] analysed multimorbidity patterns  
354 in hospitalized older patients. Their methodological and analytical approach was  
355 slightly different, and they did not take into account the weight of the diseases  
356 during the hospitalization process; however, they found a similar percentage of  
357 multimorbidity (99.7%) and 4 patterns that partially coincide with those of our  
358 study: cardiovascular, induced-dependency, falls, and osteoarticular.

359 Furthermore, several authors have published data on patterns identified from  
360 primary care electronic records in different age groups, with lists of non-  
361 comparable chronic problems and using different techniques (cluster analysis,  
362 exploratory factor analysis or latent class analysis)[16,28–33]. These results  
363 would not be directly comparable with our study, but all of them highlight the  
364 ability to identify association patterns of chronic diseases.

### 365 Strengths and limitations

366 The strengths of this study are the prospective design, ensuring data quality by  
367 thorough record keeping, the ascertainment of all CC and GS of the patient, as  
368 well as the use of a novel clustering technique. Soft clustering is a  
369 methodologically robust technique less susceptible to outliers in the data, choice  
370 of distance measure and the inclusion of inappropriate or irrelevant variables[23].  
371 Besides, our approach focuses on the patient instead of the pathologies, using a  
372 comprehensive list of conditions that includes both CC and GS, and determining  
373 a probability of belonging to each cluster. Additionally, we have taken into account

1  
2  
3 374 the relative importance of the different CC in the clinical management of the  
4  
5 375 patient during hospitalization, thus providing a better picture of the possible  
6  
7 376 complexity and needs during hospitalization.  
8  
9

10  
11 377 Furthermore, our work is not only limited to the identification of possible patterns.  
12  
13 378 We have validated them, in some way, by analysing some of the patients'  
14  
15 379 variables such as sex, number of CC, previous contacts with the health system,  
16  
17 380 hospital mortality or need for a nursing home.  
18  
19

20  
21 381 Nonetheless, our study presents some limitations that need to be considered.  
22  
23 382 Firstly, the identification of chronic pathologies does not exclusively follow a  
24  
25 383 validated list of codes but either an adaptation of different ones, a fact that could  
26  
27 384 hinder comparability with other studies on multimorbidity. Secondly, as this study  
28  
29 385 is not longitudinal, the chronology in which CC or GS appear cannot be analysed.  
30  
31 386 It is possible for a patient to evolve from one pattern to another throughout life,  
32  
33 387 as some authors have already pointed out[34], and therefore, the results only  
34  
35 388 show the present situation. However, given the purpose of the defined patterns,  
36  
37 389 this would not in itself be a limitation.  
38  
39  
40  
41

42 390 The clinical conditions severity or other possible aggravating factors have neither  
43  
44 391 been taken into account. Nevertheless, the registration of a variable that takes  
45  
46 392 into account the relevance of each CC during the care process acts, in some way,  
47  
48 393 as an indirect indicator of complexity when dealing with patients admitted  
49  
50 394 because of decompensation.  
51  
52  
53

#### 54 395 Clinical implications

55  
56

57 396 These patterns are not a picture of the community but of older patients in geriatric  
58  
59 397 or internal medicine departments, which are generally in more need of health  
60

1  
2  
3 398 services and more complex clinical management. However, not all of these  
4  
5 399 patients have the same requirements. In fact, one in five patients (the  
6  
7 400 psychogeriatric cluster) caused a great burden to both the patient and their  
8  
9 401 relatives while the patients in the most frequent cluster (cardiorespiratory), with  
10  
11 402 lower dependency and less GS, seemed to have better immediate outcome.  
12  
13  
14 403 Therefore, it is possible that the therapeutic objectives should be different in these  
15  
16 404 patients. More importantly, the ability to distinguish patients more objectively than  
17  
18 405 with the mere clinical impression may allow the design of better processes,  
19  
20 406 services or alternatives to conventional hospitalization. In addition, some patterns  
21  
22 407 may include patients with an increased risk of potentially inappropriate  
23  
24 408 prescription or adverse drug reactions. These aspects will be the object of future  
25  
26 409 analyses.

27  
28  
29  
30  
31 410 Finally, the development of clinical practice guidelines according to these  
32  
33 411 patterns needs to be considered, although it may be difficult given the magnitude  
34  
35 412 of the diseases comprised in each pattern [4,13]

### 36 37 38 39 413 **Conclusions**

40  
41  
42 414 In conclusion, in older patients admitted to hospital because of the exacerbation  
43  
44 415 of chronic health problems, it is possible to define multimorbidity clusters or  
45  
46 416 patterns using appropriate statistical techniques. These patterns make clinical  
47  
48 417 sense and could be the basis to reorganize circuits, processes or healthcare  
49  
50 418 models to tackle the increasing number of older, multimorbid patients.

### 51 52 53 54 419 **List of abbreviations**

55  
56  
57  
58 420 CC: chronic condition  
59  
60

1  
2  
3 421 GS: geriatric syndrome  
4

5  
6 422 CM: clinical management  
7

8  
9 423 O/E: observed/expected  
10

11  
12 424 COPD: chronic obstructive pulmonary disease  
13

14  
15 425 **Figure captions**  
16

17  
18 426 Figure 1. Distribution of the number of chronic conditions (excluding the following  
19  
20 427 risk factors: hypertension, dyslipidaemia, obesity, osteoporosis and drug-related  
21  
22 428 conditions) in relation to age groups.  
23

24  
25  
26 429 Figure 2. Observed/Expected (O/E) ratio and prevalence of chronic conditions  
27  
28 430 and geriatric syndromes/risk factors per multimorbidity cluster. Conditions with  
29  
30 431 exclusivity >25% and O/E ratios >1 in each cluster are represented. Conditions  
31  
32 432 are ordered by O/E ratio and from cluster 1 to 4. *COPD: Chronic Obstructive*  
33  
34 433 *Pulmonary Disease*  
35  
36  
37

38  
39 434 **Funding**  
40

41  
42 435 This work was supported by grants from Instituto de Salud Carlos III-FEDER,  
43  
44 436 [PI15/00552] and by the Network for Research into Healthcare in Chronic  
45  
46 437 Diseases, REDISSEC (RD16/0001/0002). These funding bodies had no role in  
47  
48 438 the design of the study, nor in the collection, analysis and interpretation of data  
49  
50 439 nor in writing the manuscript.  
51  
52

53  
54 440 **Competing interests**  
55

56  
57 441 The authors declare that they have no competing interests.  
58  
59  
60

1  
2  
3 442 **Data sharing statement**  
4  
5

6 443 The datasets used and/or analysed during the current study are available from  
7  
8 444 the corresponding author upon reasonable request.  
9

10  
11 445 **Authors' contributions**  
12  
13

14 446 MB conceived and supervised the study, discussed the results, wrote the first  
15  
16 447 version of the manuscript. SH, RJ, EdJ, RE and CM participated in patient  
17  
18 448 inclusion, data collection and discussion of the results and revised the  
19  
20 449 manuscript. AR executed the analysis and interpretation of multimorbidity  
21  
22 450 clusters. CV collaborated in the execution of the analyses and in the interpretation  
23  
24 451 of the multimorbidity patterns. ML participated in the statistical and graphical  
25  
26 452 analysis of the results, in the discussion of the results and the revision of several  
27  
28 453 manuscript versions. PR collaborated in the questionnaires' design, patient  
29  
30 454 inclusion, data collection and discussion of results and revised the manuscript.  
31  
32 455 All authors read and approved the final manuscript.  
33  
34  
35  
36  
37

38 456 **Acknowledgements**  
39  
40

41 457 The authors acknowledge the dedication and support of the entire MoPIM  
42  
43 458 research group, listed by institution:  
44  
45

46  
47 459 *Parc Taulí University Hospital*: Marisa Baré (Clinical Epidemiology and Cancer  
48  
49 460 Screening; REDISSEC), Susana Herranz (Acute care Geriatric Unit), Rosa  
50  
51 461 Jordana (Department of Internal Medicine), Maria Queralt Gorgas (Pharmacy  
52  
53 462 Department, REDISSEC), Sara Ortonobes (Pharmacy Department), Marina Lleal  
54  
55 463 (Fundació Parc Taulí, REDISSEC);  
56  
57  
58  
59  
60



1  
2  
3 464 *University Hospital of Vic*: Pere Roura-Poch (Epidemiology Unit; REDISSEC),  
4  
5 465 Daniel Sevilla, Núria Solà and Javier González (Pharmacy Department), Núria  
6  
7 466 Molist, Mariona Espauella (Department of Geriatrics); Oscar Mascaró  
8  
9 467 (Department of Internal Medicine);

10  
11  
12  
13 468 *Hospital del Mar Medical Research Institute-IMIM*: Elisabet de Jaime (Geriatrics  
14  
15 469 Department), Olivia Ferrandez (Pharmacy Department), Maria Sala (Department  
16  
17 470 of Epidemiology and Evaluation, REDISSEC), Miguel Ángel Márquez, Marta  
18  
19 471 Arellano, Carlos Clemente and Olga Sabartés (Department of Geriatrics), Núria  
20  
21 472 Carballo and Marta de Antonio (Pharmacy Department);

22  
23  
24  
25 473 *Hospital de Galdakao*: Rafael Estrada (Department of Internal Medicine), Maria  
26  
27 474 Olatz Ibarra (Pharmacy Department);

28  
29  
30  
31 475 *Complejo Hospitalario Universitario de Canarias*: Candelaria Martin (Department  
32  
33 476 of Internal Medicine), Gloria Julia Nazco (Pharmacy Department), Rubén  
34  
35 477 Hernández (Department of Internal Medicine).

36  
37  
38  
39 478 We are grateful to Sandra Prados, Antonio Gimeno and Beatriz Poblador for their  
40  
41 479 insightful comments, as well as to Blanca Rovira for her literature review as part  
42  
43 480 of the final project of her medical degree at UAB, and to Celia Corral, for helping  
44  
45 481 in tables and figures editing.

## 482 REFERENCES

- 483 1 Eurostat - Data Explorer.  
484 [https://appsso.eurostat.ec.europa.eu/nui/show.do?dataset=tps00200&lan](https://appsso.eurostat.ec.europa.eu/nui/show.do?dataset=tps00200&lang=en)  
485 [g=en](https://appsso.eurostat.ec.europa.eu/nui/show.do?dataset=tps00200&lang=en) (accessed 21 Oct 2020).  
486 2 OECD/EU. Health at a Glance: Europe 2018 State of Health in the EU

- 1  
2  
3 487 Cycle. 2018. doi:10.1787/health\_glance\_eur-2018-en  
4  
5  
6 488 3 Palladino R, Pennino F, Finbarr M, *et al.* Multimorbidity And Health  
7  
8 489 Outcomes In Older Adults In Ten European Health Systems, 2006-15.  
9  
10 490 *Health Aff (Millwood)* 2019;**38**:613–23. doi:10.1377/hlthaff.2018.05273  
11  
12  
13  
14 491 4 The Academy of Medical Sciences. Multimorbidity: a priority for global  
15  
16 492 health research. 2015. <https://acmedsci.ac.uk/file-download/82222577>  
17  
18  
19 493 5 Lugtenberg M, Burgers JS, Clancy C, *et al.* Current guidelines have  
20  
21 494 limited applicability to patients with comorbid conditions: A systematic  
22  
23 495 analysis of evidence-based guidelines. *PLoS One* 2011;**6**.  
24  
25 496 doi:10.1371/journal.pone.0025987  
26  
27  
28  
29 497 6 Buffel du Vaure C, Dechartres A, Battin C, *et al.* Exclusion of patients with  
30  
31 498 concomitant chronic conditions in ongoing randomised controlled trials  
32  
33 499 targeting 10 common chronic conditions and registered at  
34  
35 500 ClinicalTrials.gov: A systematic review of registration details. *BMJ Open*  
36  
37 501 2016;**6**:e012265. doi:10.1136/bmjopen-2016-012265  
38  
39  
40  
41 502 7 Fortin M, Stewart M, Poitras ME, *et al.* A systematic review of prevalence  
42  
43 503 studies on multimorbidity: Toward a more uniform methodology. *Ann Fam*  
44  
45 504 *Med* 2012;**10**:142–51. doi:10.1370/afm.1337  
46  
47  
48  
49 505 8 Diederichs C, Berger K, Bartels DB. The measurement of multiple chronic  
50  
51 506 diseases - A systematic review on existing multimorbidity indices. *J*  
52  
53 507 *Gerontol A Biol Sci Med Sci* 2011;**66**:301–11. doi:10.1093/gerona/glq208  
54  
55  
56  
57 508 9 Roso-Llorach A, Violán C, Foguet-Boreu Q, *et al.* Comparative analysis of  
58  
59 509 methods for identifying multimorbidity patterns: A study of ‘real-world’  
60

- 1  
2  
3 510 data. *BMJ Open* 2018;**8**:e018986. doi:10.1136/bmjopen-2017-018986  
4  
5  
6 511 10 Prados-Torres A, Calderón-Larrañaga A, Hanco-Saavedra J, *et al.*  
7  
8 512 Multimorbidity patterns: A systematic review. *J Clin Epidemiol*  
9  
10 513 2014;**67**:254–66. doi:10.1016/j.jclinepi.2013.09.021  
11  
12  
13  
14 514 11 Lu FP, Chang WC, Wu SC. Geriatric conditions, rather than  
15  
16 515 multimorbidity, as predictors of disability and mortality among  
17  
18 516 octogenarians: A population-based cohort study. *Geriatr Gerontol Int*  
19  
20 517 2016;**16**:345–51. doi:10.1111/ggi.12480  
21  
22  
23  
24 518 12 van der Heide I, Snoeijs SP, Boerma WGW, *et al.* How to strengthen  
25  
26 519 patient-centredness in caring for people with multimorbidity in Europe?  
27  
28 520 2017.<http://europepmc.org/books/NBK464537>  
29  
30  
31  
32 521 13 Rijken M, Struckmann V, Van Der Heide I, *et al.* How to improve care for  
33  
34 522 people with multimorbidity in Europe?  
35  
36 523 2016.[https://www.euro.who.int/en/about-](https://www.euro.who.int/en/about-us/partners/observatory/publications/policy-briefs-and-summaries/how-to-improve-care-for-people-with-multimorbidity-in-europe)  
37  
38 524 [us/partners/observatory/publications/policy-briefs-and-summaries/how-to-](https://www.euro.who.int/en/about-us/partners/observatory/publications/policy-briefs-and-summaries/how-to-improve-care-for-people-with-multimorbidity-in-europe)  
39  
40 525 [improve-care-for-people-with-multimorbidity-in-europe](https://www.euro.who.int/en/about-us/partners/observatory/publications/policy-briefs-and-summaries/how-to-improve-care-for-people-with-multimorbidity-in-europe)  
41  
42  
43  
44 526 14 NICE. Multimorbidity: clinical assessment and management NICE  
45  
46 527 guideline. 2016. [www.nice.org.uk/guidance/ng56](http://www.nice.org.uk/guidance/ng56)  
47  
48  
49 528 15 Catalá-López F, Alonso-Arroyo A, Page MJ, *et al.* Mapping of global  
50  
51 529 scientific research in comorbidity and multimorbidity: A cross-sectional  
52  
53 530 analysis. *PLoS One* 2018;**13**:e0189091.  
54  
55 531 doi:10.1371/journal.pone.0189091  
56  
57  
58  
59 532 16 Clerencia-Sierra M, Calderón-Larrañaga A, Martínez-Velilla N, *et al.*  
60

- 1  
2  
3 533 Multimorbidity patterns in hospitalized older patients: Associations among  
4  
5 534 chronic diseases and geriatric syndromes. *PLoS One* 2015;**10**:e0132909.  
6  
7 535 doi:10.1371/journal.pone.0132909  
8  
9  
10  
11 536 17 Baré M, Herranz S, Jordana R, *et al.* Multimorbidity patterns in chronic  
12  
13 537 older patients, potentially inappropriate prescribing and adverse drug  
14  
15 538 reactions: protocol of the multicentre prospective cohort study MoPIM.  
16  
17 539 *BMJ Open* 2020;**10**:e033322. doi:10.1136/bmjopen-2019-033322  
18  
19  
20  
21 540 18 Shah S, Vanclay F, Cooper B. Improving the sensitivity of the Barthel  
22  
23 541 Index for stroke rehabilitation. *J Clin Epidemiol* 1989;**42**:703–9.  
24  
25 542 doi:10.1016/0895-4356(89)90065-6  
26  
27  
28  
29 543 19 Salisbury C, Johnson L, Purdy S, *et al.* Epidemiology and impact of  
30  
31 544 multimorbidity in primary care: a retrospective cohort study. *Br J Gen*  
32  
33 545 *Pract* 2011;**61**:e12-21. doi:10.3399/bjgp11X548929  
34  
35  
36  
37 546 20 Charlson ME, Peter P, Ales KL, *et al.* A new method of classifying  
38  
39 547 prognostic comorbidity in longitudinal studies: development and  
40  
41 548 validation. *J Chron Dis* 1987;**40**:373–83. doi:10.1016/0021-  
42  
43 549 9681(87)90171-8  
44  
45  
46  
47 550 21 Amblàs-Novellas J, Martori JC, Espauella J, *et al.* Frail-VIG index: A  
48  
49 551 concise frailty evaluation tool for rapid geriatric assessment. *BMC Geriatr*  
50  
51 552 2018;**18**:29. doi:10.1186/s12877-018-0718-2  
52  
53  
54  
55 553 22 Quan H, Li B, Couris CM, *et al.* Updating and validating the charlson  
56  
57 554 comorbidity index and score for risk adjustment in hospital discharge  
58  
59 555 abstracts using data from 6 countries. *Am J Epidemiol* 2011;**173**:676–82.  
60

- 1  
2  
3 556 doi:10.1093/aje/kwq433  
4  
5  
6 557 23 Violán C, Foguet-Boreu Q, Fernández-Bertolín S, *et al.* Soft clustering  
7  
8 558 using real-world data for the identification of multimorbidity patterns in an  
9  
10 559 elderly population: cross-sectional study in a Mediterranean population.  
11  
12 2019;**9**:e029594. doi:10.1136/bmjopen-2019-029594  
13  
14  
15  
16 561 24 Chavent M, Kuentz-Simonet V, Labenne A, *et al.* Multivariate analysis of  
17  
18 562 mixed data: the R package PCAmixdata. arXiv preprint,  
19  
20 563 <https://arxiv.org/abs/1411.4911v4>. 2017.  
21  
22  
23  
24 564 25 Karlis D, Saporta G, Spinakis A. A simple rule for the selection of principal  
25  
26 565 components. *Commun Stat - Theory Methods* 2003;**32**:643–66.  
27  
28 566 doi:10.1081/STA-120018556  
29  
30  
31  
32 567 26 Zhao Q. *Cluster Validity in Clustering Methods*.  
33  
34 568 2012.<http://cs.joensuu.fi/sipu/pub/qinpei-thesis.pdf>  
35  
36  
37 569 27 Guisado-Clavero M, Roso-Llorach A, López-Jimenez T, *et al.*  
38  
39 570 Multimorbidity patterns in the elderly: A prospective cohort study with  
40  
41 571 cluster analysis. *BMC Geriatr* 2018;**18**:16. doi:10.1186/s12877-018-0705-  
42  
43 572 7  
44  
45  
46  
47 573 28 Marengoni A, Roso-Llorach A, Vetrano DL, *et al.* Patterns of  
48  
49 574 Multimorbidity in a Population-Based Cohort of Older People:  
50  
51 575 Sociodemographic, Lifestyle, Clinical, and Functional Differences. *J*  
52  
53 576 *Gerontol A Biol Sci Med Sci* 2019;**75**:798–805. doi:10.1093/gerona/glz137  
54  
55  
56  
57 577 29 Violán C, Roso-Llorach A, Foguet-Boreu Q, *et al.* Multimorbidity patterns  
58  
59 578 with K-means nonhierarchical cluster analysis. *BMC Fam Pract*

- 1  
2  
3 579 2018;**19**:108. doi:10.1186/s12875-018-0790-x  
4  
5  
6 580 30 Juul-Larsen HG, Christensen LD, Bandholm T, *et al.* Patterns of  
7  
8 581 multimorbidity and differences in healthcare utilization and complexity  
9  
10 582 among acutely hospitalized medical patients ( $\geq 65$  years) – a latent class  
11  
12 583 approach. *Clin Epidemiol* 2020;**12**:245–59. doi:10.2147/CLEP.S226586  
13  
14  
15  
16 584 31 Zhu Y, Edwards D, Mant J, *et al.* Characteristics, service use and  
17  
18 585 mortality of clusters of multimorbid patients in England: a population-  
19  
20 586 based study. *BMC Med* 2020;**18**:78. doi:10.1186/s12916-020-01543-8  
21  
22  
23  
24 587 32 Nguyen QD, Wu C, Odden MC, *et al.* Multimorbidity patterns, frailty, and  
25  
26 588 survival in community-dwelling older adults. *Journals Gerontol - Ser A Biol*  
27  
28 589 *Sci Med Sci* 2019;**74**:1265–70. doi:10.1093/gerona/gly205  
29  
30  
31  
32 590 33 Poblador-Plou B, van den Akker M, Vos R, *et al.* Similar multimorbidity  
33  
34 591 patterns in primary care patients from two European regions: results of a  
35  
36 592 factor analysis. *PLoS One* 2014;**9**:e100375.  
37  
38 593 doi:10.1371/journal.pone.0100375  
39  
40  
41  
42 594 34 Vetrano DL, Roso-Llorach A, Fernández S, *et al.* Twelve-year clinical  
43  
44 595 trajectories of multimorbidity in a population of older adults. *Nat Commun*  
45  
46 596 2020;**11**:1–9. doi:10.1038/s41467-020-16780-x  
47  
48  
49  
50 597

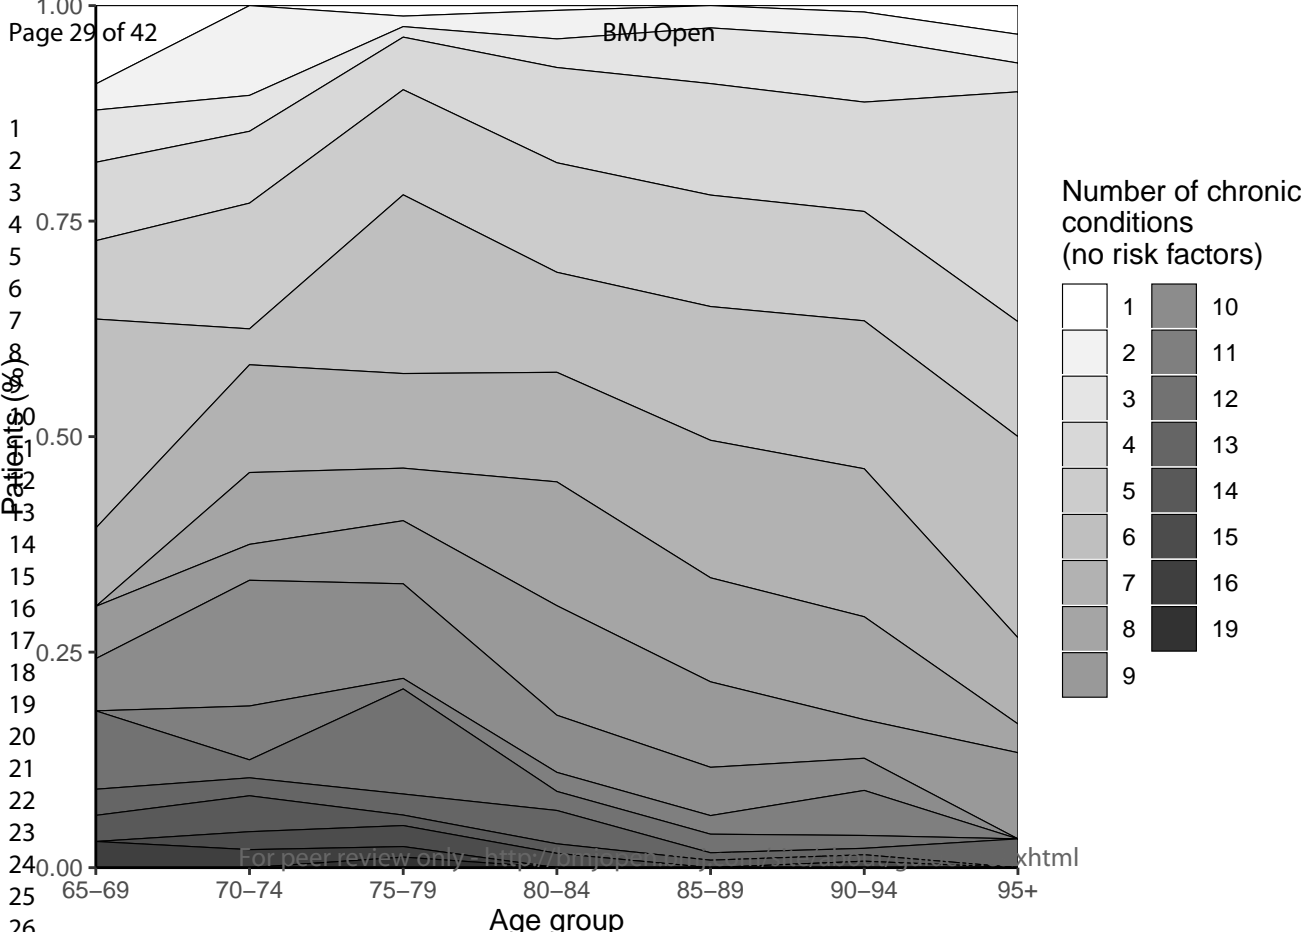

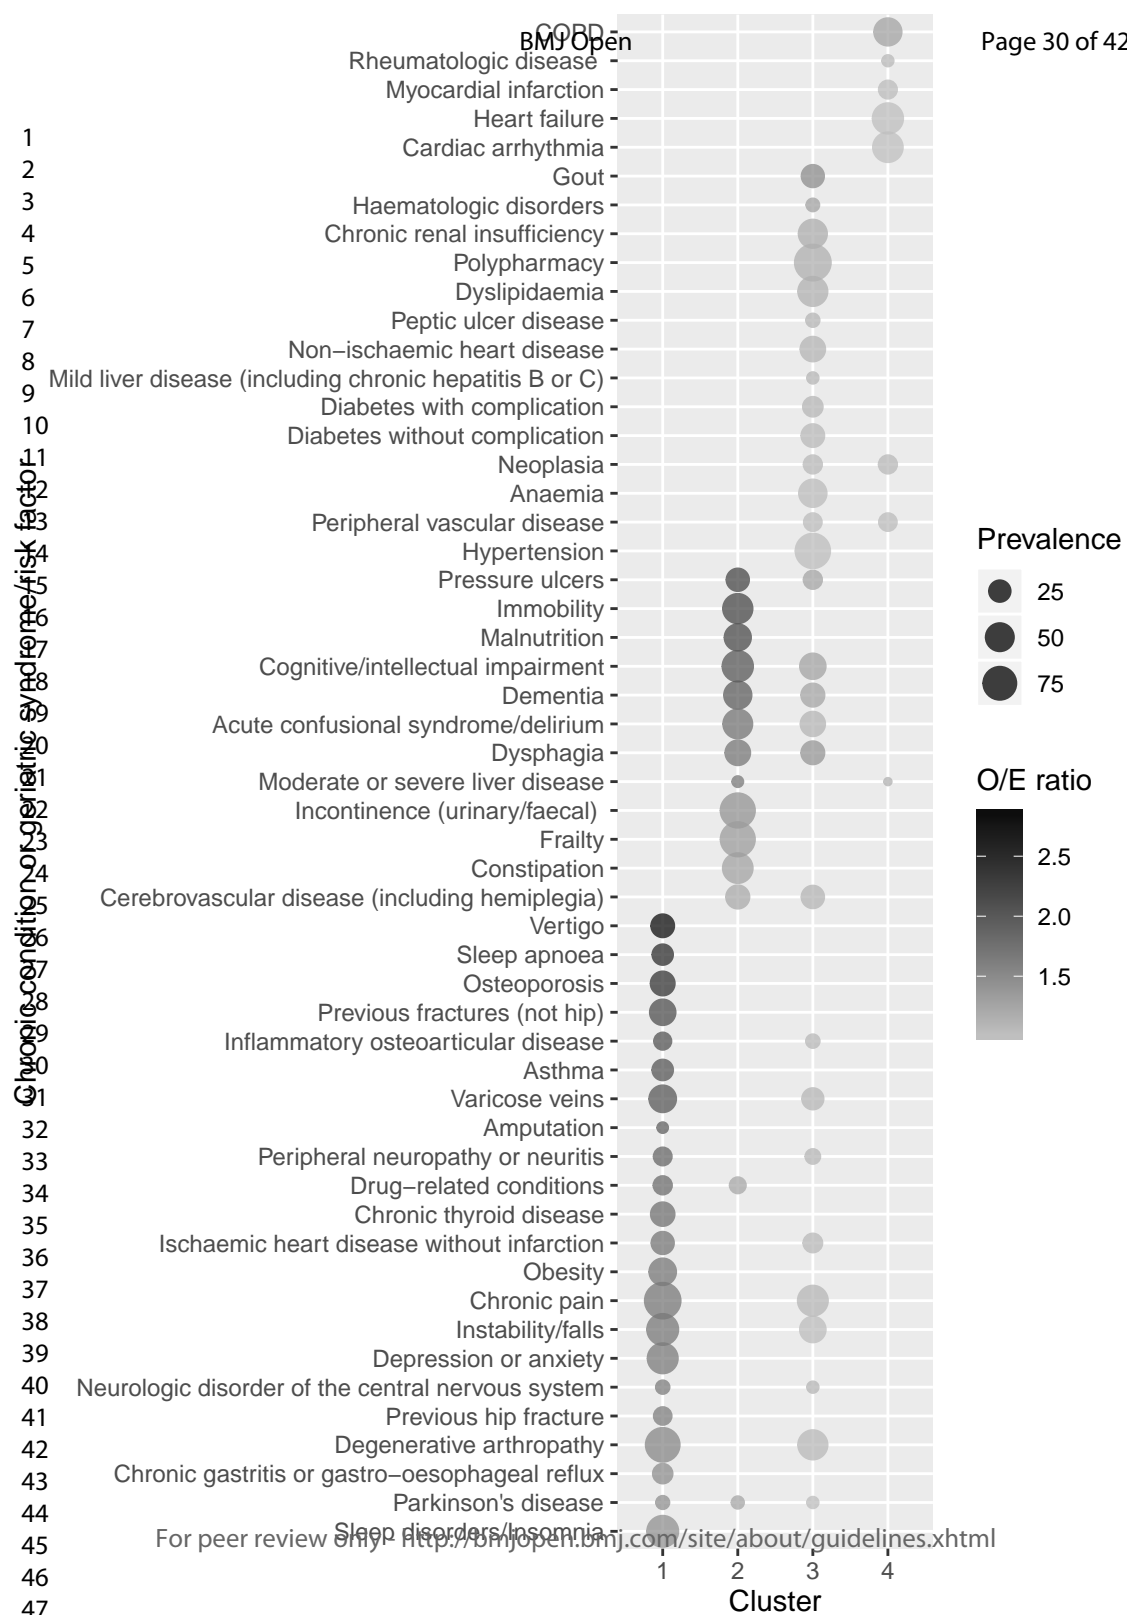



Supplemental Table 1. Chronic conditions and geriatric syndromes recorded.

| <b>Chronic conditions</b>                | <b>Geriatric syndromes and risk factors</b> |
|------------------------------------------|---------------------------------------------|
| <b><i>Charlson Index</i></b>             |                                             |
| 1. AIDS/HIV                              | Acute confusional syndrome/delirium         |
| 2. Any malignancy (excluding skin)       | Chronic pain                                |
| 3. Cerebrovascular disease               | Cognitive/Intellectual impairment           |
| 4. Chronic obstructive pulmonary disease | Constipation                                |
| 5. Congestive heart failure              | Depression or Anxiety                       |
| 6. Dementia                              | Dysphagia                                   |
| 7. Diabetes with complication            | Frailty                                     |
| 8. Diabetes without complication         | Immobility                                  |
| 9. Hemiplegia                            | Incontinence (Urinary/faecal)               |
| 10. Leukaemia                            | Instability/falls                           |
| 11. Lymphoma                             | Malnutrition                                |
| 12. Metastatic solid tumour              | Polypharmacy                                |
| 13. Mild liver disease                   | Pressure ulcers                             |
| 14. Moderate or severe liver disease     | Sensorial deficit                           |
| 15. Moderate or severe renal disease     | Sleep disorders/Insomnia                    |
| 16. Myocardial infarction                |                                             |
| 17. Peptic ulcer disease                 |                                             |
| 18. Peripheral vascular disease          |                                             |
| 19. Rheumatologic disease                |                                             |
| <b><i>Other conditions</i></b>           |                                             |
| 20. Amputation                           |                                             |
| 21. Anaemia                              |                                             |
| 22. Asthma                               |                                             |
| 23. Cardiac arrhythmia                   |                                             |
| 24. Cataract                             |                                             |
| 25. Chronic hepatitis (B or C)           |                                             |
| 26. Chronic pancreatic disease           |                                             |
| 27. Degenerative arthropathy             |                                             |
| 28. Dermatitis or eczema                 |                                             |

- 
- 1 29. Diverticular disease of the colon
  - 2 30. Drug-related conditions
  - 3 31. Dyslipidaemia (risk factor)
  - 4 32. Fibromyalgia
  - 5 33. Gallstones (previous hepatic colic)
  - 6 34. Chronic gastritis or gastro-oesophageal
  - 7 reflux
  - 8 35. Glaucoma
  - 9 36. Gout
  - 10 37. Haemorrhoids
  - 11 38. Haematologic disorders (myelodysplastic
  - 12 syndrome, gammopathy, polycythaemia)
  - 13 39. Hypertension (risk factor)
  - 14 40. Inflammatory osteoarticular disease
  - 15 41. Irritable bowel syndrome
  - 16 42. Ischaemic heart disease without infarction
  - 17 43. Migraine
  - 18 44. Neurologic disorder of the central nervous
  - 19 system
  - 20 45. Non-congestive heart failure
  - 21 46. Non-ischaemic heart disease
  - 22 (miocardiopathy, valvulopathy)
  - 23 47. Non-schizophrenic mental disorders
  - 24 (excluding depression and anxiety)
  - 25 48. Obesity (risk factor)
  - 26 49. Osteoporosis (risk factor)
  - 27 50. Other neurological pathologies (essential
  - 28 tremor)
  - 29 51. Other vascular diseases (ischaemia,
  - 30 aneurism)
  - 31 52. Parkinson's disease
  - 32 53. Peripheral neuropathy or neuritis
  - 33 54. Post-traumatic stress disorder
  - 34 55. Previous fractures (not hip)
  - 35 56. Previous hip fracture
-

- 
- 1 57. Prostatic benign hypertrophy
  - 2 58. Schizophrenia
  - 3 59. Sleep apnoea
  - 4 60. Chronic thyroid disease
  - 5 61. Tuberculosis
  - 6 62. Urinary tract stones (nephritic colic)
  - 7 63. Varicose veins of lower extremities
  - 8 64. Vertigo
- 

For peer review only

10  
11  
12  
13  
14  
15  
16  
17  
18  
19  
20  
21  
22  
23  
24  
25  
26  
27  
28  
29  
30  
31  
32  
33  
34  
35  
36  
37  
38  
39  
40  
41  
42  
43  
44  
45  
46

**Supplemental Table 2.** Prevalence rates of chronic conditions and geriatric syndromes / risk factors in the study population by sex, separately listed in decreasing order of total prevalence rate.

|                                                                    | Female (394) |       |               | Male (346) |       |               | Total (740) |       |               |
|--------------------------------------------------------------------|--------------|-------|---------------|------------|-------|---------------|-------------|-------|---------------|
|                                                                    | N            | %     | 95% CI        | N          | %     | 95% CI        | N           | %     | 95%CI         |
| <b>CHRONIC CONDITIONS</b>                                          |              |       |               |            |       |               |             |       |               |
| <b>Risk factors</b>                                                |              |       |               |            |       |               |             |       |               |
| Hypertension                                                       | 330          | 83.76 | 79.79 - 87.07 | 273        | 78.90 | 74.30 - 82.87 | 603         | 81.49 | 78.53 - 84.12 |
| Dyslipidaemia                                                      | 189          | 47.97 | 43.08 - 52.90 | 171        | 49.42 | 44.19 - 54.67 | 360         | 48.65 | 45.06 - 52.25 |
| Obesity                                                            | 127          | 32.23 | 27.81 - 37.00 | 66         | 19.08 | 15.28 - 23.55 | 193         | 26.08 | 23.05 - 29.36 |
| Osteoporosis                                                       | 82           | 20.81 | 17.09 - 25.09 | 21         | 6.07  | 4.00 - 9.10   | 103         | 13.92 | 11.61 - 16.60 |
| Drug-related conditions                                            | 44           | 11.17 | 8.42 - 14.66  | 23         | 6.65  | 4.47 - 9.78   | 67          | 9.05  | 7.19 - 11.34  |
| <b>Chronic Diseases</b>                                            |              |       |               |            |       |               |             |       |               |
| Heart failure                                                      | 255          | 64.72 | 59.88 - 69.28 | 188        | 54.34 | 49.07 - 59.51 | 443         | 59.86 | 56.29 - 63.34 |
| Cardiac arrhythmia                                                 | 216          | 54.82 | 49.89 - 59.67 | 207        | 59.83 | 54.58 - 64.86 | 423         | 57.16 | 53.57 - 60.68 |
| Degenerative arthropathy                                           | 228          | 57.87 | 52.94 - 62.64 | 157        | 45.38 | 40.21 - 50.64 | 385         | 52.03 | 48.43 - 55.61 |
| Anaemia                                                            | 182          | 46.19 | 41.33 - 51.13 | 152        | 43.93 | 38.80 - 49.20 | 334         | 45.14 | 41.58 - 48.74 |
| Moderate or severe renal disease                                   | 164          | 41.62 | 36.86 - 46.55 | 156        | 45.09 | 39.93 - 50.35 | 320         | 43.24 | 39.72 - 46.84 |
| Chronic obstructive pulmonary disease (COPD)                       | 90           | 22.84 | 18.97 - 27.24 | 183        | 52.89 | 47.63 - 58.09 | 273         | 36.89 | 33.49 - 40.43 |
| Non-ischaemic heart disease                                        | 125          | 31.73 | 27.33 - 36.48 | 113        | 32.66 | 27.93 - 37.77 | 238         | 32.16 | 28.90 - 35.61 |
| Diabetes without complication                                      | 101          | 25.63 | 21.57 - 30.17 | 100        | 28.90 | 24.38 - 33.89 | 201         | 27.16 | 24.08 - 30.48 |
| Cerebrovascular disease (including hemiplegia)                     | 95           | 24.11 | 20.15 - 28.57 | 93         | 26.88 | 22.48 - 31.78 | 188         | 25.41 | 22.40 - 28.66 |
| Dementia                                                           | 103          | 26.14 | 22.05 - 30.70 | 76         | 21.97 | 17.92 - 26.62 | 179         | 24.19 | 21.24 - 27.40 |
| Varicose veins of lower extremities                                | 98           | 24.87 | 20.86 - 29.37 | 66         | 19.08 | 15.28 - 23.55 | 164         | 22.16 | 19.32 - 25.29 |
| Previous fracture (not hip)                                        | 87           | 22.08 | 18.27 - 26.44 | 52         | 15.03 | 11.65 - 19.18 | 139         | 18.78 | 16.13 - 21.76 |
| Gout                                                               | 57           | 14.47 | 11.34 - 18.28 | 80         | 23.12 | 18.99 - 27.84 | 137         | 18.51 | 15.88 - 21.47 |
| Chronic thyroid disease                                            | 93           | 23.60 | 19.68 - 28.04 | 42         | 12.14 | 9.11 - 16.00  | 135         | 18.24 | 15.63 - 21.19 |
| Diabetes with complication                                         | 70           | 17.77 | 14.31 - 21.85 | 63         | 18.21 | 14.50 - 22.62 | 133         | 17.97 | 15.37 - 20.90 |
| Ischaemic heart disease without infarction                         | 58           | 14.72 | 11.56 - 18.56 | 62         | 17.92 | 14.24 - 22.31 | 120         | 16.22 | 13.74 - 19.05 |
| Myocardial infarction                                              | 47           | 11.93 | 9.09 - 15.50  | 64         | 18.50 | 14.76 - 22.93 | 111         | 15.00 | 12.61 - 17.75 |
| Neoplasia (including leukaemia, lymphoma, metastatic solid tumour) | 29           | 7.36  | 5.17 - 10.37  | 82         | 23.70 | 19.52 - 28.45 | 111         | 15.00 | 12.61 - 17.75 |
| Peripheral vascular disease                                        | 31           | 7.87  | 5.60 - 10.95  | 74         | 21.39 | 17.39 - 26.01 | 105         | 14.19 | 11.86 - 16.89 |
| Chronic gastritis or gastro-oesophageal reflux                     | 55           | 13.96 | 10.88 - 17.73 | 42         | 12.14 | 9.11 - 16.00  | 97          | 13.11 | 10.87 - 15.73 |

|                                                         | Female (394) |       |               | Male (346) |       |               | Total (740) |       |               |
|---------------------------------------------------------|--------------|-------|---------------|------------|-------|---------------|-------------|-------|---------------|
|                                                         | N            | %     | 95% CI        | N          | %     | 95% CI        | N           | %     | 95%CI         |
| Asthma                                                  | 74           | 18.78 | 15.23 - 22.93 | 8          | 2.31  | 1.18 - 4.50   | 82          | 11.08 | 9.02 - 13.55  |
| Gallstones                                              | 39           | 9.90  | 7.33 - 13.25  | 40         | 11.56 | 8.61 - 15.36  | 79          | 10.68 | 8.65 - 13.11  |
| Vertigo                                                 | 54           | 13.71 | 10.66 - 17.45 | 23         | 6.65  | 4.47 - 9.78   | 77          | 10.41 | 8.41 - 12.81  |
| Previous hip fracture                                   | 52           | 13.20 | 10.21 - 16.90 | 15         | 4.34  | 2.64 - 7.03   | 67          | 9.05  | 7.19 - 11.34  |
| Sleep apnoea                                            | 34           | 8.63  | 6.24 - 11.82  | 32         | 9.25  | 6.63 - 12.76  | 66          | 8.92  | 7.07 - 11.19  |
| Peripheral neuropathy or neuritis                       | 27           | 6.85  | 4.75 - 9.79   | 34         | 9.83  | 7.12 - 13.42  | 61          | 8.24  | 6.47 - 10.45  |
| Inflammatory osteoarticular disease                     | 26           | 6.60  | 4.54 - 9.49   | 23         | 6.65  | 4.47 - 9.78   | 49          | 6.62  | 5.04 - 8.65   |
| Peptic ulcer disease                                    | 11           | 2.79  | 1.57 - 4.93   | 35         | 10.12 | 7.36 - 13.74  | 46          | 6.22  | 4.69 - 8.19   |
| Haematologic disorders                                  | 14           | 3.55  | 2.13 - 5.88   | 22         | 6.36  | 4.24 - 9.44   | 36          | 4.86  | 3.53 - 6.66   |
| Parkinson disease                                       | 15           | 3.81  | 2.32 - 6.19   | 19         | 5.49  | 3.54 - 8.42   | 34          | 4.59  | 3.31 - 6.35   |
| Rheumatologic disease                                   | 22           | 5.58  | 3.72 - 8.31   | 10         | 2.89  | 1.58 - 5.24   | 32          | 4.32  | 3.08 - 6.04   |
| Mild liver disease (including chronic hepatitis B or C) | 12           | 3.05  | 1.75 - 5.25   | 20         | 5.78  | 3.77 - 8.76   | 32          | 4.32  | 3.08 - 6.04   |
| Neurologic disorder of the CNS                          | 11           | 2.79  | 1.57 - 4.93   | 21         | 6.07  | 4.00 - 9.10   | 32          | 4.32  | 3.08 - 6.04   |
| Moderate or severe liver disease                        | 9            | 2.28  | 1.21 - 4.28   | 10         | 2.89  | 1.58 - 5.24   | 19          | 2.57  | 1.65 - 3.98   |
| Amputation                                              | 4            | 1.02  | 0.40 - 2.58   | 12         | 3.47  | 1.99 - 5.96   | 16          | 2.16  | 1.34 - 3.48   |
| Urinary tract stones                                    | 9            | 2.28  | 1.21 - 4.28   | 5          | 1.45  | 0.62 - 3.34   | 14          | 1.89  | 1.13 - 3.15   |
| Non-schizophrenic mental disorders                      | 11           | 2.79  | 1.57 - 4.93   | 1          | 0.29  | 0.01 - 1.62   | 12          | 1.62  | 0.93 - 2.81   |
| Irritable bowel syndrome                                | 7            | 1.78  | 0.86 - 3.62   | 4          | 1.16  | 0.45 - 2.93   | 11          | 1.49  | 0.83 - 2.64   |
| Chronic pancreatic disease                              | 4            | 1.02  | 0.40 - 2.58   | 6          | 1.73  | 0.80 - 3.73   | 10          | 1.35  | 0.74 - 2.47   |
| Tuberculosis                                            | 5            | 1.27  | 0.54 - 2.94   | 4          | 1.16  | 0.45 - 2.93   | 9           | 1.22  | 0.64 - 2.30   |
| Other neurological pathologies                          | 3            | 0.76  | 0.26 - 2.21   | 6          | 1.73  | 0.80 - 3.73   | 9           | 1.22  | 0.64 - 2.30   |
| Fibromyalgia                                            | 6            | 1.52  | 0.70 - 3.28   | 2          | 0.58  | 0.16 - 2.08   | 8           | 1.08  | 0.55 - 2.12   |
| Migraine                                                | 4            | 1.02  | 0.40 - 2.58   | 0          | 0.00  | 0.00 - 1.10   | 4           | 0.54  | 0.21 - 1.38   |
| Schizophrenia                                           | 1            | 0.25  | 0.01 - 1.42   | 2          | 0.58  | 0.16 - 2.08   | 3           | 0.41  | 0.14 - 1.19   |
| Post-traumatic stress disorder                          | 1            | 0.25  | 0.01 - 1.42   | 2          | 0.58  | 0.16 - 2.08   | 3           | 0.41  | 0.14 - 1.19   |
| AIDS/HIV                                                | 0            | 0.00  | 0.00 - 0.00   | 0          | 0.00  | 0.00 - 0.00   | 0           | 0.00  | 0.00 - 0.00   |
| <b>GERIATRIC SYNDROMES AND RISK FACTORS</b>             |              |       |               |            |       |               |             |       |               |
| Polypharmacy                                            | 310          | 78.68 | 74.37 - 82.44 | 281        | 81.21 | 76.76 - 84.98 | 591         | 79.86 | 76.82 - 82.60 |
| Frailty                                                 | 269          | 68.27 | 63.52 - 72.67 | 188        | 54.34 | 49.07 - 59.51 | 457         | 61.76 | 58.20 - 65.19 |
| Incontinence (Urinary/faecal)                           | 273          | 69.29 | 64.57 - 73.64 | 157        | 45.38 | 40.21 - 50.64 | 430         | 58.11 | 54.52 - 61.61 |
| Chronic pain                                            | 231          | 58.63 | 53.71 - 63.39 | 171        | 49.42 | 44.19 - 54.67 | 402         | 54.32 | 50.72 - 57.88 |
| Constipation                                            | 201          | 51.02 | 46.09 - 55.92 | 139        | 40.17 | 35.14 - 45.42 | 340         | 45.95 | 42.39 - 49.55 |

|                                       | Female (394) |       |               | Male (346) |       |               | Total (740) |       |               |
|---------------------------------------|--------------|-------|---------------|------------|-------|---------------|-------------|-------|---------------|
|                                       | N            | %     | 95% CI        | N          | %     | 95% CI        | N           | %     | 95%CI         |
| Sleep disorders/Insomnia              | 189          | 47.97 | 43.08 - 52.90 | 144        | 41.62 | 36.54 - 46.88 | 333         | 45.00 | 41.45 - 48.60 |
| Sensorial deficit                     | 169          | 42.89 | 38.10 - 47.83 | 145        | 41.91 | 36.83 - 47.17 | 314         | 42.43 | 38.92 - 46.02 |
| Instability/falls                     | 158          | 40.10 | 35.38 - 45.01 | 128        | 36.99 | 32.08 - 42.20 | 286         | 38.65 | 35.21 - 42.21 |
| Depression or anxiety                 | 193          | 48.98 | 44.08 - 53.91 | 75         | 21.68 | 17.66 - 26.32 | 268         | 36.22 | 32.83 - 39.74 |
| Acute confusional syndrome / delirium | 118          | 29.95 | 25.64 - 34.65 | 117        | 33.82 | 29.03 - 38.95 | 235         | 31.76 | 28.50 - 35.20 |
| Cognitive/Intellectual impairment     | 133          | 33.76 | 29.26 - 38.56 | 96         | 27.75 | 23.29 - 32.69 | 229         | 30.95 | 27.72 - 34.37 |
| Immobility                            | 114          | 28.93 | 24.68 - 33.60 | 78         | 22.54 | 18.46 - 27.23 | 192         | 25.95 | 22.92 - 29.22 |
| Dysphagia                             | 78           | 19.80 | 16.16 - 24.01 | 81         | 23.41 | 19.26 - 28.15 | 159         | 21.49 | 18.68 - 24.59 |
| Malnutrition                          | 76           | 19.29 | 15.70 - 23.47 | 71         | 20.52 | 16.60 - 25.09 | 147         | 19.86 | 17.15 - 22.89 |
| Pressure ulcers                       | 57           | 14.47 | 11.34 - 18.28 | 38         | 10.98 | 8.11 - 14.72  | 95          | 12.84 | 10.62 - 15.44 |

peer review only

**Supplemental Table 3.** Weight as an indicator of importance on clinical management assigned to each chronic condition. Weight values range from 0 to 8, where 0 means no clinical management was required and 1 to 8 indicate clinical management from main cause of hospitalization (1) to chronic condition requiring the least medical attention (8). Chronic conditions are displayed in alphabetical order.

| Chronic conditions                             | Weight 0 |       | Weight 1 |       | Weight 2 |       | Weight 3 |      | Weight 4 |      | Weight 5 |      | Weight 6 |      | Weight 7 |      | Weight 8 |   |
|------------------------------------------------|----------|-------|----------|-------|----------|-------|----------|------|----------|------|----------|------|----------|------|----------|------|----------|---|
|                                                | N        | %     | N        | %     | N        | %     | N        | %    | N        | %    | N        | %    | N        | %    | N        | %    | N        | % |
| AIDS/HIV                                       | 740      | 100   | 0        | 0     | 0        | 0     | 0        | 0    | 0        | 0    | 0        | 0    | 0        | 0    | 0        | 0    | 0        | 0 |
| Amputation                                     | 739      | 99.86 | 0        | 0     | 1        | 0.14  | 0        | 0    | 0        | 0    | 0        | 0    | 0        | 0    | 0        | 0    | 0        | 0 |
| Anaemia                                        | 596      | 80.54 | 28       | 3.78  | 46       | 6.22  | 40       | 5.41 | 19       | 2.57 | 8        | 1.08 | 3        | 0.41 | 0        | 0    | 0        | 0 |
| Asthma                                         | 704      | 95.14 | 30       | 4.05  | 3        | 0.41  | 2        | 0.27 | 1        | 0.14 | 0        | 0    | 0        | 0    | 0        | 0    | 0        | 0 |
| Rheumatologic disease                          | 729      | 98.51 | 5        | 0.68  | 3        | 0.41  | 3        | 0.41 | 0        | 0    | 0        | 0    | 0        | 0    | 0        | 0    | 0        | 0 |
| Cardiac arrhythmia                             | 595      | 80.41 | 35       | 4.73  | 69       | 9.32  | 28       | 3.78 | 10       | 1.35 | 3        | 0.41 | 0        | 0    | 0        | 0    | 0        | 0 |
| Cerebrovascular disease (including hemiplegia) | 703      | 95    | 28       | 3.78  | 3        | 0.41  | 3        | 0.41 | 2        | 0.27 | 1        | 0.14 | 0        | 0    | 0        | 0    | 0        | 0 |
| Chronic gastritis or gastro-oesophageal reflux | 733      | 99.05 | 4        | 0.54  | 1        | 0.14  | 1        | 0.14 | 1        | 0.14 | 0        | 0    | 0        | 0    | 0        | 0    | 0        | 0 |
| Chronic pancreatic disease                     | 739      | 99.86 | 0        | 0     | 1        | 0.14  | 0        | 0    | 0        | 0    | 0        | 0    | 0        | 0    | 0        | 0    | 0        | 0 |
| Chronic obstructive pulmonary disease (COPD)   | 554      | 74.86 | 153      | 20.68 | 19       | 2.57  | 8        | 1.08 | 5        | 0.68 | 0        | 0    | 1        | 0.14 | 0        | 0    | 0        | 0 |
| Chronic thyroid disease                        | 722      | 97.57 | 2        | 0.27  | 1        | 0.14  | 4        | 0.54 | 7        | 0.95 | 3        | 0.41 | 1        | 0.14 | 0        | 0    | 0        | 0 |
| Degenerative arthropathy                       | 718      | 97.03 | 3        | 0.41  | 7        | 0.95  | 4        | 0.54 | 4        | 0.54 | 3        | 0.41 | 1        | 0.14 | 0        | 0    | 0        | 0 |
| Dementia                                       | 687      | 92.84 | 32       | 4.32  | 14       | 1.89  | 4        | 0.54 | 3        | 0.41 | 0        | 0    | 0        | 0    | 0        | 0    | 0        | 0 |
| Diabetes with complication                     | 710      | 95.95 | 9        | 1.22  | 7        | 0.95  | 5        | 0.68 | 4        | 0.54 | 2        | 0.27 | 3        | 0.41 | 0        | 0    | 0        | 0 |
| Diabetes without complication                  | 698      | 94.32 | 11       | 1.49  | 5        | 0.68  | 13       | 1.76 | 8        | 1.08 | 2        | 0.27 | 1        | 0.14 | 2        | 0.27 | 0        | 0 |
| Drug-related conditions                        | 722      | 97.57 | 5        | 0.68  | 3        | 0.41  | 3        | 0.41 | 4        | 0.54 | 1        | 0.14 | 1        | 0.14 | 1        | 0.14 | 0        | 0 |
| Dyslipidaemia                                  | 735      | 99.32 | 0        | 0     | 0        | 0     | 0        | 0    | 4        | 0.54 | 1        | 0.14 | 0        | 0    | 0        | 0    | 0        | 0 |
| Fibromyalgia                                   | 739      | 99.86 | 0        | 0     | 1        | 0.14  | 0        | 0    | 0        | 0    | 0        | 0    | 0        | 0    | 0        | 0    | 0        | 0 |
| Gallstones                                     | 730      | 98.65 | 6        | 0.81  | 3        | 0.41  | 1        | 0.14 | 0        | 0    | 0        | 0    | 0        | 0    | 0        | 0    | 0        | 0 |
| Gout                                           | 737      | 99.59 | 0        | 0     | 0        | 0     | 2        | 0.27 | 0        | 0    | 1        | 0.14 | 0        | 0    | 0        | 0    | 0        | 0 |
| Haematologic disorders                         | 730      | 98.65 | 2        | 0.27  | 5        | 0.68  | 2        | 0.27 | 1        | 0.14 | 0        | 0    | 0        | 0    | 0        | 0    | 0        | 0 |
| Heart failure                                  | 410      | 55.41 | 227      | 30.68 | 85       | 11.49 | 13       | 1.76 | 4        | 0.54 | 0        | 0    | 1        | 0.14 | 0        | 0    | 0        | 0 |
| Hypertension                                   | 698      | 94.32 | 10       | 1.35  | 14       | 1.89  | 12       | 1.62 | 4        | 0.54 | 2        | 0.27 | 0        | 0    | 0        | 0    | 0        | 0 |
| Inflammatory osteoarticular disease            | 727      | 98.24 | 8        | 1.08  | 1        | 0.14  | 1        | 0.14 | 1        | 0.14 | 1        | 0.14 | 1        | 0.14 | 0        | 0    | 0        | 0 |
| Irritable bowel syndrome                       | 740      | 100   | 0        | 0     | 0        | 0     | 0        | 0    | 0        | 0    | 0        | 0    | 0        | 0    | 0        | 0    | 0        | 0 |
| Ischaemic heart disease without infarction     | 714      | 96.49 | 10       | 1.35  | 14       | 1.89  | 1        | 0.14 | 0        | 0    | 1        | 0.14 | 0        | 0    | 0        | 0    | 0        | 0 |

|    |                                                                    |     |       |    |      |    |       |    |      |    |      |   |      |   |      |   |      |
|----|--------------------------------------------------------------------|-----|-------|----|------|----|-------|----|------|----|------|---|------|---|------|---|------|
| 1  | Migraine                                                           | 740 | 100   | 0  | 0    | 0  | 0     | 0  | 0    | 0  | 0    | 0 | 0    | 0 | 0    | 0 | 0    |
| 2  | Mild liver disease (including chronic hepatitis B or C)            | 733 | 99.05 | 5  | 0.68 | 0  | 0     | 1  | 0.14 | 0  | 0    | 0 | 0    | 0 | 0    | 1 | 0.14 |
| 3  | Moderate or severe liver disease                                   | 724 | 97.84 | 12 | 1.62 | 2  | 0.27  | 1  | 0.14 | 0  | 0    | 1 | 0.14 | 0 | 0    | 0 | 0    |
| 4  | Moderate or severe renal disease                                   | 552 | 74.59 | 39 | 5.27 | 77 | 10.41 | 44 | 5.95 | 23 | 3.11 | 4 | 0.54 | 1 | 0.14 | 0 | 0    |
| 5  | Myocardial infarction                                              | 716 | 96.76 | 20 | 2.7  | 3  | 0.41  | 1  | 0.14 | 0  | 0    | 0 | 0    | 0 | 0    | 0 | 0    |
| 6  | Neoplasia (including leukaemia, lymphoma, metastatic solid tumour) | 724 | 97.84 | 5  | 0.68 | 7  | 0.95  | 1  | 0.14 | 1  | 0.14 | 2 | 0.27 | 0 | 0    | 0 | 0    |
| 7  | Neurologic disorder of the CNS                                     | 736 | 99.46 | 2  | 0.27 | 2  | 0.27  | 0  | 0    | 0  | 0    | 0 | 0    | 0 | 0    | 0 | 0    |
| 8  | Non-ischaemic heart disease                                        | 695 | 93.92 | 15 | 2.03 | 16 | 2.16  | 12 | 1.62 | 0  | 0    | 2 | 0.27 | 0 | 0    | 0 | 0    |
| 9  | Non-schizophrenic mental disorders                                 | 732 | 98.92 | 2  | 0.27 | 2  | 0.27  | 1  | 0.14 | 2  | 0.27 | 1 | 0.14 | 0 | 0    | 0 | 0    |
| 10 | Obesity                                                            | 737 | 99.59 | 0  | 0    | 1  | 0.14  | 2  | 0.27 | 0  | 0    | 0 | 0    | 0 | 0    | 0 | 0    |
| 11 | Osteoporosis                                                       | 730 | 98.65 | 2  | 0.27 | 3  | 0.41  | 2  | 0.27 | 2  | 0.27 | 0 | 0    | 1 | 0.14 | 0 | 0    |
| 12 | Other neurological pathologies                                     | 740 | 100   | 0  | 0    | 0  | 0     | 0  | 0    | 0  | 0    | 0 | 0    | 0 | 0    | 0 | 0    |
| 13 | Parkinson's disease                                                | 737 | 99.59 | 3  | 0.41 | 0  | 0     | 0  | 0    | 0  | 0    | 0 | 0    | 0 | 0    | 0 | 0    |
| 14 | Peptic ulcer disease                                               | 737 | 99.59 | 2  | 0.27 | 1  | 0.14  | 0  | 0    | 0  | 0    | 0 | 0    | 0 | 0    | 0 | 0    |
| 15 | Peripheral neuropathy or neuritis                                  | 737 | 99.59 | 1  | 0.14 | 1  | 0.14  | 1  | 0.14 | 0  | 0    | 0 | 0    | 0 | 0    | 0 | 0    |
| 16 | Peripheral vascular disease                                        | 728 | 98.38 | 9  | 1.22 | 1  | 0.14  | 1  | 0.14 | 0  | 0    | 0 | 0    | 1 | 0.14 | 0 | 0    |
| 17 | Post-traumatic stress disorder                                     | 739 | 99.86 | 1  | 0.14 | 0  | 0     | 0  | 0    | 0  | 0    | 0 | 0    | 0 | 0    | 0 | 0    |
| 18 | Previous fracture (not hip)                                        | 730 | 98.65 | 5  | 0.68 | 2  | 0.27  | 2  | 0.27 | 1  | 0.14 | 0 | 0    | 0 | 0    | 0 | 0    |
| 19 | Previous hip fracture                                              | 740 | 100   | 0  | 0    | 0  | 0     | 0  | 0    | 0  | 0    | 0 | 0    | 0 | 0    | 0 | 0    |
| 20 | Schizophrenia                                                      | 740 | 100   | 0  | 0    | 0  | 0     | 0  | 0    | 0  | 0    | 0 | 0    | 0 | 0    | 0 | 0    |
| 21 | Sleep apnoea                                                       | 716 | 96.76 | 5  | 0.68 | 9  | 1.22  | 5  | 0.68 | 1  | 0.14 | 4 | 0.54 | 0 | 0    | 0 | 0    |
| 22 | Tuberculosis                                                       | 740 | 100   | 0  | 0    | 0  | 0     | 0  | 0    | 0  | 0    | 0 | 0    | 0 | 0    | 0 | 0    |
| 23 | Urinary tract stones                                               | 740 | 100   | 0  | 0    | 0  | 0     | 0  | 0    | 0  | 0    | 0 | 0    | 0 | 0    | 0 | 0    |
| 24 | Varicose veins of lower extremities                                | 725 | 97.97 | 1  | 0.14 | 6  | 0.81  | 2  | 0.27 | 4  | 0.54 | 2 | 0.27 | 0 | 0    | 0 | 0    |
| 25 | Vertigo                                                            | 740 | 100   | 0  | 0    | 0  | 0     | 0  | 0    | 0  | 0    | 0 | 0    | 0 | 0    | 0 | 0    |



**Supplemental table 4.** Prevalence, Observed/Expected (O/E) ratios and exclusivity of chronic conditions and geriatric syndromes / risk factors per multimorbidity cluster. Conditions with prevalence >2% were included. O/E ratios were calculated by dividing the prevalence of a disease within the cluster by its prevalence in the overall population. Exclusivity was calculated by dividing the number of patients with the disease in the cluster by the total number of participants with the disease. Conditions are ordered by decreasing O/E ratio of cluster 1.

|                                                | Cluster 1      |           |                 | Cluster 2      |           |                 | Cluster 3      |           |                 | Cluster 4      |           |                 |
|------------------------------------------------|----------------|-----------|-----------------|----------------|-----------|-----------------|----------------|-----------|-----------------|----------------|-----------|-----------------|
|                                                | Prevalence (%) | O/E ratio | Exclusivity (%) | Prevalence (%) | O/E ratio | Exclusivity (%) | Prevalence (%) | O/E ratio | Exclusivity (%) | Prevalence (%) | O/E ratio | Exclusivity (%) |
| Vertigo                                        | 29.58          | 2.84      | 50.67           | 9.52           | 0.91      | 18.92           | 6.85           | 0.66      | 15.90           | 4.05           | 0.39      | 14.52           |
| Sleep apnoea                                   | 22.11          | 2.48      | 44.19           | 5.82           | 0.65      | 13.50           | 8.12           | 0.91      | 21.99           | 4.85           | 0.54      | 20.33           |
| Osteoporosis                                   | 33.39          | 2.40      | 42.76           | 9.95           | 0.71      | 14.79           | 9.44           | 0.68      | 16.38           | 9.72           | 0.70      | 26.07           |
| Previous fracture (not hip)                    | 39.67          | 2.11      | 37.65           | 17.87          | 0.95      | 19.68           | 15.16          | 0.81      | 19.49           | 11.66          | 0.62      | 23.19           |
| Inflammatory osteoarticular disease            | 13.61          | 2.06      | 36.65           | 2.78           | 0.42      | 8.69            | 7.21           | 1.09      | 26.31           | 5.03           | 0.76      | 28.36           |
| Asthma                                         | 22.50          | 2.03      | 36.19           | 9.37           | 0.85      | 17.49           | 7.77           | 0.70      | 16.94           | 8.72           | 0.79      | 29.37           |
| Varicose veins of lower extremities            | 44.58          | 2.01      | 35.86           | 15.2           | 0.69      | 14.19           | 24.37          | 1.10      | 26.56           | 13.89          | 0.63      | 23.40           |
| Amputation                                     | 4.190          | 1.94      | 34.56           | 1.72           | 0.8       | 16.45           | 2.00           | 0.92      | 22.30           | 1.55           | 0.71      | 26.69           |
| Peripheral neuropathy or neuritis              | 15.37          | 1.86      | 33.23           | 6.00           | 0.73      | 15.06           | 9.03           | 1.10      | 26.46           | 5.58           | 0.68      | 25.26           |
| Drug-related conditions                        | 16.31          | 1.80      | 32.12           | 11.23          | 1.24      | 25.66           | 7.41           | 0.82      | 19.76           | 5.45           | 0.60      | 22.46           |
| Chronic thyroid disease                        | 32.14          | 1.76      | 31.40           | 13.73          | 0.75      | 15.57           | 16.06          | 0.88      | 21.26           | 15.52          | 0.85      | 31.77           |
| Ischaemic heart disease without infarction     | 27.75          | 1.71      | 30.5            | 10.85          | 0.67      | 13.84           | 17.59          | 1.08      | 26.20           | 12.79          | 0.79      | 29.46           |
| Obesity                                        | 44.29          | 1.70      | 30.27           | 19.14          | 0.73      | 15.18           | 25.15          | 0.96      | 23.28           | 21.84          | 0.84      | 31.27           |
| Chronic pain                                   | 91.68          | 1.69      | 30.09           | 50.3           | 0.93      | 19.15           | 59.72          | 1.10      | 26.55           | 35.23          | 0.65      | 24.22           |
| Instability/falls                              | 65.05          | 1.68      | 30.00           | 36.74          | 0.95      | 19.66           | 40.06          | 1.04      | 25.03           | 26.19          | 0.68      | 25.30           |
| Depression or Anxiety                          | 60.05          | 1.66      | 29.56           | 35.49          | 0.98      | 20.27           | 30.57          | 0.84      | 20.38           | 28.89          | 0.80      | 29.79           |
| Neurologic disorder of the CNS                 | 7.10           | 1.64      | 29.28           | 4.92           | 1.14      | 23.54           | 4.78           | 1.11      | 26.72           | 2.37           | 0.55      | 20.47           |
| Previous hip fracture                          | 14.76          | 1.63      | 29.06           | 9.23           | 1.02      | 21.08           | 6.20           | 0.69      | 16.55           | 8.08           | 0.89      | 33.31           |
| Degenerative arthropathy                       | 80.19          | 1.54      | 27.48           | 48.11          | 0.92      | 19.13           | 56.15          | 1.08      | 26.06           | 38.08          | 0.73      | 27.34           |
| Chronic gastritis or gastro-oesophageal reflux | 19.39          | 1.48      | 26.37           | 9.09           | 0.69      | 14.35           | 12.6           | 0.96      | 23.22           | 12.66          | 0.97      | 36.07           |
| Parkinson's disease                            | 6.72           | 1.46      | 26.07           | 5.73           | 1.25      | 25.78           | 4.77           | 1.04      | 25.08           | 2.84           | 0.62      | 23.06           |
| Sleep disorders/Insomnia                       | 64.93          | 1.44      | 25.72           | 51.57          | 1.15      | 23.70           | 42.58          | 0.95      | 22.85           | 33.41          | 0.74      | 27.73           |
| Moderate or severe renal disease               | 59.30          | 1.37      | 24.44           | 29.11          | 0.67      | 13.92           | 51.19          | 1.18      | 28.59           | 38.27          | 0.88      | 33.05           |
| Non-ischaemic heart disease                    | 43.07          | 1.34      | 23.87           | 23.15          | 0.72      | 14.89           | 36.01          | 1.12      | 27.04           | 29.46          | 0.92      | 34.20           |

|    |                                                                    |       |      |       |       |      |       |       |      |       |       |      |       |
|----|--------------------------------------------------------------------|-------|------|-------|-------|------|-------|-------|------|-------|-------|------|-------|
| 1  | Myocardial infarction                                              | 19.88 | 1.33 | 23.63 | 10.00 | 0.67 | 13.79 | 14.68 | 0.98 | 23.64 | 15.64 | 1.04 | 38.94 |
| 2  | Dyslipidaemia                                                      | 64.28 | 1.32 | 23.55 | 35.21 | 0.72 | 14.97 | 55.63 | 1.14 | 27.62 | 44.11 | 0.91 | 33.86 |
| 3  | Frailty                                                            | 81.11 | 1.31 | 23.41 | 82.71 | 1.34 | 27.70 | 55.05 | 0.89 | 21.53 | 45.26 | 0.73 | 27.36 |
| 4  | Anaemia                                                            | 59.26 | 1.31 | 23.40 | 42.23 | 0.94 | 19.35 | 47.71 | 1.06 | 25.53 | 38.34 | 0.85 | 31.72 |
| 5  | Gallstones                                                         | 13.87 | 1.30 | 23.16 | 10.6  | 0.99 | 20.54 | 9.66  | 0.90 | 21.85 | 9.85  | 0.92 | 34.46 |
| 6  | Haematologic disorders                                             | 6.24  | 1.28 | 22.88 | 2.80  | 0.58 | 11.91 | 6.24  | 1.28 | 30.99 | 4.46  | 0.92 | 34.22 |
| 7  | Constipation                                                       | 57.53 | 1.25 | 22.32 | 58.53 | 1.27 | 26.35 | 36.80 | 0.80 | 19.34 | 39.36 | 0.86 | 31.99 |
| 8  | Incontinence (Urinary/faecal)                                      | 72.26 | 1.24 | 22.17 | 82.95 | 1.43 | 29.52 | 54.73 | 0.94 | 22.75 | 39.78 | 0.68 | 25.56 |
| 9  | Gout                                                               | 22.86 | 1.23 | 22.01 | 9.85  | 0.53 | 11.01 | 27.66 | 1.49 | 36.08 | 15.32 | 0.83 | 30.90 |
| 10 | Diabetes with complication                                         | 21.71 | 1.21 | 21.53 | 14.68 | 0.82 | 16.89 | 19.79 | 1.10 | 26.59 | 16.84 | 0.94 | 34.99 |
| 11 | Polypharmacy                                                       | 96.12 | 1.20 | 21.45 | 64.75 | 0.81 | 16.77 | 92.87 | 1.16 | 28.08 | 72.07 | 0.90 | 33.70 |
| 12 | Rheumatologic disease                                              | 5.08  | 1.17 | 20.93 | 4.16  | 0.96 | 19.91 | 3.34  | 0.77 | 18.66 | 4.69  | 1.08 | 40.50 |
| 13 | Dysphagia                                                          | 24.83 | 1.16 | 20.60 | 36.49 | 1.70 | 35.13 | 29.98 | 1.40 | 33.70 | 6.09  | 0.28 | 10.58 |
| 14 | Cerebrovascular disease (including hemiplegia)                     | 29.02 | 1.14 | 20.36 | 30.75 | 1.21 | 25.04 | 28.38 | 1.12 | 26.98 | 18.79 | 0.74 | 27.62 |
| 15 | Acute confusional syndrome/delirium                                | 36.00 | 1.13 | 20.21 | 54.77 | 1.72 | 35.67 | 35.27 | 1.11 | 26.82 | 14.71 | 0.46 | 17.30 |
| 16 | Heart failure                                                      | 66.53 | 1.11 | 19.81 | 57.88 | 0.97 | 20.00 | 54.09 | 0.90 | 21.82 | 61.52 | 1.03 | 38.37 |
| 17 | Peripheral vascular disease                                        | 15.71 | 1.11 | 19.74 | 10.69 | 0.75 | 15.58 | 14.98 | 1.06 | 25.50 | 14.89 | 1.05 | 39.17 |
| 18 | Hypertension                                                       | 89.07 | 1.09 | 19.48 | 78.13 | 0.96 | 19.83 | 84.73 | 1.04 | 25.11 | 77.62 | 0.95 | 35.57 |
| 19 | Cardiac arrhythmia                                                 | 61.85 | 1.08 | 19.29 | 52.03 | 0.91 | 18.82 | 56.49 | 0.99 | 23.87 | 58.20 | 1.02 | 38.02 |
| 20 | Peptic ulcer disease                                               | 6.70  | 1.08 | 19.22 | 5.00  | 0.80 | 16.64 | 6.97  | 1.12 | 27.09 | 6.17  | 0.99 | 37.05 |
| 21 | Sensorial deficit                                                  | 39.51 | 0.93 | 16.60 | 44.27 | 1.04 | 21.58 | 43.84 | 1.03 | 24.95 | 41.89 | 0.99 | 36.87 |
| 22 | Immobility                                                         | 23.10 | 0.89 | 15.87 | 56.49 | 2.18 | 45.03 | 26.23 | 1.01 | 24.41 | 10.21 | 0.39 | 14.69 |
| 23 | Moderate or severe liver disease                                   | 2.23  | 0.87 | 15.46 | 4.33  | 1.69 | 34.91 | 0.69  | 0.27 | 6.51  | 2.96  | 1.15 | 43.11 |
| 24 | Neoplasia (including leukaemia, lymphoma, metastatic solid tumour) | 12.74 | 0.85 | 15.15 | 13.39 | 0.89 | 18.46 | 16.19 | 1.08 | 26.07 | 16.20 | 1.08 | 40.32 |
| 25 | Chronic obstructive pulmonary disease (COPD)                       | 29.97 | 0.81 | 14.48 | 27.29 | 0.74 | 15.30 | 34.75 | 0.94 | 22.75 | 46.90 | 1.27 | 47.47 |
| 26 | Mild liver disease (including chronic hepatitis B or C)            | 3.41  | 0.79 | 14.04 | 4.69  | 1.08 | 22.41 | 4.81  | 1.11 | 26.84 | 4.25  | 0.98 | 36.70 |
| 27 | Cognitive/Intellectual impairment                                  | 23.44 | 0.76 | 13.50 | 62.07 | 2.01 | 41.48 | 39.53 | 1.28 | 30.85 | 11.74 | 0.38 | 14.17 |
| 28 | Diabetes without complication                                      | 20.64 | 0.76 | 13.54 | 30.98 | 1.14 | 23.59 | 29.45 | 1.08 | 26.18 | 26.69 | 0.98 | 36.69 |
| 29 | Pressure ulcers                                                    | 7.44  | 0.58 | 10.33 | 28.11 | 2.19 | 45.28 | 16.20 | 1.26 | 30.48 | 4.78  | 0.37 | 13.90 |
| 30 | Dementia                                                           | 12.34 | 0.51 | 9.10  | 47.13 | 1.95 | 40.30 | 30.43 | 1.26 | 30.38 | 13.10 | 0.54 | 20.23 |
| 31 | Malnutrition                                                       | 8.69  | 0.44 | 7.80  | 42.75 | 2.15 | 44.50 | 13.57 | 0.68 | 16.50 | 16.60 | 0.84 | 31.20 |

1  
2  
3  
4  
5  
6  
7  
8  
9  
10  
11  
12  
13  
14  
15  
16  
17  
18  
19  
20  
21  
22  
23  
24  
25  
26  
27  
28  
29  
30  
31  
32  
33  
34  
35  
36  
37  
38  
39  
40  
41  
42  
43  
44  
45  
46

For peer review only

STROBE Statement—Checklist of items that should be included in reports of *cohort studies*

|                              | Item No | Recommendation                                                                                                                                                                                                                                                                                                         | Page No  |
|------------------------------|---------|------------------------------------------------------------------------------------------------------------------------------------------------------------------------------------------------------------------------------------------------------------------------------------------------------------------------|----------|
| <b>Title and abstract</b>    | 1       | (a) Indicate the study's design with a commonly used term in the title or the abstract<br>(b) Provide in the abstract an informative and balanced summary of what was done and what was found                                                                                                                          | 1<br>2-3 |
| <b>Introduction</b>          |         |                                                                                                                                                                                                                                                                                                                        |          |
| Background/rationale         | 2       | Explain the scientific background and rationale for the investigation being reported                                                                                                                                                                                                                                   | 4-5      |
| Objectives                   | 3       | State specific objectives, including any prespecified hypotheses                                                                                                                                                                                                                                                       | 5        |
| <b>Methods</b>               |         |                                                                                                                                                                                                                                                                                                                        |          |
| Study design                 | 4       | Present key elements of study design early in the paper                                                                                                                                                                                                                                                                | 6        |
| Setting                      | 5       | Describe the setting, locations, and relevant dates, including periods of recruitment, exposure, follow-up, and data collection                                                                                                                                                                                        | 6        |
| Participants                 | 6       | (a) Give the eligibility criteria, and the sources and methods of selection of participants. Describe methods of follow-up<br>(b) For matched studies, give matching criteria and number of exposed and unexposed                                                                                                      | 6        |
| Variables                    | 7       | Clearly define all outcomes, exposures, predictors, potential confounders, and effect modifiers. Give diagnostic criteria, if applicable                                                                                                                                                                               | 6-8      |
| Data sources/<br>measurement | 8*      | For each variable of interest, give sources of data and details of methods of assessment (measurement). Describe comparability of assessment methods if there is more than one group                                                                                                                                   | 6-8      |
| Bias                         | 9       | Describe any efforts to address potential sources of bias                                                                                                                                                                                                                                                              | 7-8      |
| Study size                   | 10      | Explain how the study size was arrived at                                                                                                                                                                                                                                                                              | 8        |
| Quantitative variables       | 11      | Explain how quantitative variables were handled in the analyses. If applicable, describe which groupings were chosen and why                                                                                                                                                                                           | 8-11     |
| Statistical methods          | 12      | (a) Describe all statistical methods, including those used to control for confounding<br>(b) Describe any methods used to examine subgroups and interactions<br>(c) Explain how missing data were addressed<br>(d) If applicable, explain how loss to follow-up was addressed<br>(e) Describe any sensitivity analyses | 8-11     |
| <b>Results</b>               |         |                                                                                                                                                                                                                                                                                                                        |          |
| Participants                 | 13*     | (a) Report numbers of individuals at each stage of study—eg numbers potentially eligible, examined for eligibility, confirmed eligible, included in the study, completing follow-up, and analysed<br>(b) Give reasons for non-participation at each stage<br>(c) Consider use of a flow diagram                        | 11       |
| Descriptive data             | 14*     | (a) Give characteristics of study participants (eg demographic, clinical, social) and information on exposures and potential confounders<br>(b) Indicate number of participants with missing data for each variable of interest<br>(c) Summarise follow-up time (eg, average and total amount)                         | 11-12    |
| Outcome data                 | 15*     | Report numbers of outcome events or summary measures over time                                                                                                                                                                                                                                                         | 12       |

|    |                          |    |                                                                                                                                                                                                              |       |
|----|--------------------------|----|--------------------------------------------------------------------------------------------------------------------------------------------------------------------------------------------------------------|-------|
| 1  | Main results             | 16 | (a) Give unadjusted estimates and, if applicable, confounder-adjusted estimates and their precision (eg, 95% confidence interval). Make clear which confounders were adjusted for and why they were included | 11-14 |
| 2  |                          |    | (b) Report category boundaries when continuous variables were categorized                                                                                                                                    |       |
| 3  |                          |    | (c) If relevant, consider translating estimates of relative risk into absolute risk for a meaningful time period                                                                                             |       |
| 4  |                          |    |                                                                                                                                                                                                              |       |
| 5  |                          |    |                                                                                                                                                                                                              |       |
| 6  |                          |    |                                                                                                                                                                                                              |       |
| 7  |                          |    |                                                                                                                                                                                                              |       |
| 8  |                          |    |                                                                                                                                                                                                              |       |
| 9  | Other analyses           | 17 | Report other analyses done—eg analyses of subgroups and interactions, and sensitivity analyses                                                                                                               | -     |
| 10 |                          |    |                                                                                                                                                                                                              |       |
| 11 | <b>Discussion</b>        |    |                                                                                                                                                                                                              |       |
| 12 |                          |    |                                                                                                                                                                                                              |       |
| 13 | Key results              | 18 | Summarise key results with reference to study objectives                                                                                                                                                     | 15-16 |
| 14 |                          |    |                                                                                                                                                                                                              |       |
| 15 | Limitations              | 19 | Discuss limitations of the study, taking into account sources of potential bias or imprecision. Discuss both direction and magnitude of any potential bias                                                   | 17-18 |
| 16 |                          |    |                                                                                                                                                                                                              |       |
| 17 | Interpretation           | 20 | Give a cautious overall interpretation of results considering objectives, limitations, multiplicity of analyses, results from similar studies, and other relevant evidence                                   | 18-19 |
| 18 |                          |    |                                                                                                                                                                                                              |       |
| 19 |                          |    |                                                                                                                                                                                                              |       |
| 20 | Generalisability         | 21 | Discuss the generalisability (external validity) of the study results                                                                                                                                        | 17    |
| 21 |                          |    |                                                                                                                                                                                                              |       |
| 22 | <b>Other information</b> |    |                                                                                                                                                                                                              |       |
| 23 | Funding                  | 22 | Give the source of funding and the role of the funders for the present study and, if applicable, for the original study on which the present article is based                                                | 20    |
| 24 |                          |    |                                                                                                                                                                                                              |       |
| 25 |                          |    |                                                                                                                                                                                                              |       |

\*Give information separately for exposed and unexposed groups.

**Note:** An Explanation and Elaboration article discusses each checklist item and gives methodological background and published examples of transparent reporting. The STROBE checklist is best used in conjunction with this article (freely available on the Web sites of PLoS Medicine at <http://www.plosmedicine.org/>, Annals of Internal Medicine at <http://www.annals.org/>, and Epidemiology at <http://www.epidem.com/>). Information on the STROBE Initiative is available at <http://www.strobe-statement.org>.

# BMJ Open

## Multimorbidity patterns of chronic conditions and geriatric syndromes in older patients from the MoPIM multicentre cohort study.

|                                 |                                                                                                                                                                                                                                                                                                                                                                                                                                                                                                                                                                                                                                                                                                                                                                                                               |
|---------------------------------|---------------------------------------------------------------------------------------------------------------------------------------------------------------------------------------------------------------------------------------------------------------------------------------------------------------------------------------------------------------------------------------------------------------------------------------------------------------------------------------------------------------------------------------------------------------------------------------------------------------------------------------------------------------------------------------------------------------------------------------------------------------------------------------------------------------|
| Journal:                        | <i>BMJ Open</i>                                                                                                                                                                                                                                                                                                                                                                                                                                                                                                                                                                                                                                                                                                                                                                                               |
| Manuscript ID                   | bmjopen-2021-049334.R1                                                                                                                                                                                                                                                                                                                                                                                                                                                                                                                                                                                                                                                                                                                                                                                        |
| Article Type:                   | Original research                                                                                                                                                                                                                                                                                                                                                                                                                                                                                                                                                                                                                                                                                                                                                                                             |
| Date Submitted by the Author:   | 07-Sep-2021                                                                                                                                                                                                                                                                                                                                                                                                                                                                                                                                                                                                                                                                                                                                                                                                   |
| Complete List of Authors:       | Baré, Marisa; Consorci Corporació Sanitària Parc Taulí, Clinical Epidemiology and Cancer Screening; REDISSEC<br>Herranz, Susana; Consorci Corporació Sanitària Parc Taulí, Acute care Geriatric Unit<br>Roso-Llorach, Albert; IDIAP Jordi Gol; Universitat Autònoma de Barcelona<br>Jordana, Rosa; Consorci Corporació Sanitària Parc Taulí, Internal Medicine<br>Violán, Concepción; IDIAP Jordi Gol<br>Lleal, Marina; Consorci Corporació Sanitària Parc Taulí, Clinical Epidemiology and Cancer Screening<br>Roura-Poch, Pere; Consorci Hospitalari de Vic, Epidemiology; REDISSEC<br>Arellano, Marta; Consorci Parc de Salut MAR de Barcelona, Geriatrics<br>Estrada, Rafael; Hospital Galdakao-Usansolo, Internal Medicine<br>Nazco, Gloria Julia; Hospital Universitario de Canarias, Hospital Pharmacy |
| <b>Primary Subject Heading</b>: | Health services research                                                                                                                                                                                                                                                                                                                                                                                                                                                                                                                                                                                                                                                                                                                                                                                      |
| Secondary Subject Heading:      | Geriatric medicine                                                                                                                                                                                                                                                                                                                                                                                                                                                                                                                                                                                                                                                                                                                                                                                            |
| Keywords:                       | INTERNAL MEDICINE, STATISTICS & RESEARCH METHODS, GERIATRIC MEDICINE, Quality in health care < HEALTH SERVICES ADMINISTRATION & MANAGEMENT                                                                                                                                                                                                                                                                                                                                                                                                                                                                                                                                                                                                                                                                    |
|                                 |                                                                                                                                                                                                                                                                                                                                                                                                                                                                                                                                                                                                                                                                                                                                                                                                               |

SCHOLARONE™  
Manuscripts



I, the Submitting Author has the right to grant and does grant on behalf of all authors of the Work (as defined in the below author licence), an exclusive licence and/or a non-exclusive licence for contributions from authors who are: i) UK Crown employees; ii) where BMJ has agreed a CC-BY licence shall apply, and/or iii) in accordance with the terms applicable for US Federal Government officers or employees acting as part of their official duties; on a worldwide, perpetual, irrevocable, royalty-free basis to BMJ Publishing Group Ltd ("BMJ") its licensees and where the relevant Journal is co-owned by BMJ to the co-owners of the Journal, to publish the Work in this journal and any other BMJ products and to exploit all rights, as set out in our [licence](#).

The Submitting Author accepts and understands that any supply made under these terms is made by BMJ to the Submitting Author unless you are acting as an employee on behalf of your employer or a postgraduate student of an affiliated institution which is paying any applicable article publishing charge ("APC") for Open Access articles. Where the Submitting Author wishes to make the Work available on an Open Access basis (and intends to pay the relevant APC), the terms of reuse of such Open Access shall be governed by a Creative Commons licence – details of these licences and which [Creative Commons](#) licence will apply to this Work are set out in our licence referred to above.

Other than as permitted in any relevant BMJ Author's Self Archiving Policies, I confirm this Work has not been accepted for publication elsewhere, is not being considered for publication elsewhere and does not duplicate material already published. I confirm all authors consent to publication of this Work and authorise the granting of this licence.

1  
2  
3 1 **MULTIMORBIDITY PATTERNS OF CHRONIC CONDITIONS AND GERIATRIC**  
4 **SYNDROMES IN OLDER PATIENTS FROM THE MoPIM MULTICENTRE**  
5 **2**  
6 **3**  
7 **COHORT STUDY.**

8  
9 4 Marisa Baré<sup>1,2,\*</sup>, Susana Herranz<sup>3</sup>, Albert Roso-Llorach<sup>4,5</sup>, Rosa Jordana<sup>6</sup>,  
10  
11 5 Concepción Violán<sup>4</sup>, Marina Lleal<sup>1</sup>, Pere Roura-Poch<sup>7,2</sup>, Marta Arellano<sup>8</sup>, Rafael  
12  
13 6 Estrada<sup>9</sup>, Gloria Julia Nazco<sup>10</sup>, on behalf of the MoPIM study group.

- 14  
15 7 1. Clinical Epidemiology and Cancer Screening Department, Consorci  
16  
17 8 Corporació Sanitària Parc Taulí, Sabadell, Spain  
18  
19 9 2. Health Services Research on Chronic Patients Network (REDISSEC),  
20  
21 10 Spain  
22  
23 11 3. Acute Care Geriatric Unit, Consorci Corporació Sanitària Parc Taulí,  
24  
25 12 Sabadell, Spain  
26  
27 13 4. Institut Universitari d'Investigació en Atenció Primària Jordi Gol (IDIAP  
28  
29 14 Jordi Gol), Barcelona, Spain.  
30  
31 15 5. Universitat Autònoma de Barcelona, Cerdanyola del Vallès, Spain.  
32  
33 16 6. Internal Medicine Department, Consorci Corporació Sanitària Parc Taulí,  
34  
35 17 Sabadell, Spain  
36  
37 18 7. Epidemiology Department, Consorci Hospitalari de Vic, Vic, Spain  
38  
39 19 8. Geriatrics Department, Consorci Parc de Salut MAR, Barcelona, Spain  
40  
41 20 9. Internal Medicine Department, Hospital Galdakao-Usansolo, Galdacano,  
42  
43 21 Spain  
44  
45 22 10. Pharmacy Department, Hospital Universitario de Canarias, La Laguna,  
46  
47 23 Spain

48  
49  
50  
51  
52  
53  
54  
55  
56  
57  
58  
59  
60  
24 \* **Corresponding author: Marisa Baré, MD, MPH, PhD**

25 Clinical Epidemiology and Cancer Screening

26 Corporació Sanitària Parc Taulí

27 Parc Taulí 1, 08208 Sabadell, Spain

28 phone: 0034 937458245

29 e-mail: [mbare@tauli.cat](mailto:mbare@tauli.cat)

30 Word count: 3779 words



1  
2  
3 31 **ABSTRACT**  
4  
5

6 32 **Objectives:** To estimate the frequency of chronic conditions and geriatric  
7  
8 33 syndromes in older patients admitted to hospital because of an exacerbation of  
9  
10 34 their chronic conditions, and to identify multimorbidity clusters in these patients.  
11  
12

13  
14 35 **Design:** Multicentre, prospective cohort study.  
15  
16

17 36 **Setting:** Internal medicine or geriatric services of five general teaching hospitals  
18  
19 37 in Spain.  
20  
21

22 38 **Participants:** 740 patients aged 65 and older, hospitalized because of an  
23  
24 39 exacerbation of their chronic conditions between September 2016 and December  
25  
26 40 2018.  
27  
28

29  
30 41 **Primary and secondary outcome measures:** Active chronic conditions and  
31  
32 42 geriatric syndromes (including risk factors) of the patient, a score about clinical  
33  
34 43 management of chronic conditions during admission, and destination at  
35  
36 44 discharge were collected, among other variables. Multimorbidity patterns were  
37  
38 45 identified using fuzzy c-means cluster analysis, taking into account the clinical  
39  
40 46 management score. Prevalence, observed/expected ratio and exclusivity of each  
41  
42 47 chronic condition and geriatric syndrome were calculated for each cluster, and  
43  
44 48 the final solution was approved after clinical revision and discussion among the  
45  
46 49 research team.  
47  
48

49  
50 50 **Results:** 740 patients were included (mean age 84.12 years, SD 7.01; 53.24%  
51  
52 51 female). Almost all patients had two or more chronic conditions (98.65%; 95%CI  
53  
54 52 98.23-99.07), the most frequent were hypertension (81.49%, 95%CI 78.53-84.12)  
55  
56 53 and heart failure (59.86%, 95%CI 56.29-63.34). The most prevalent geriatric  
57  
58  
59  
60

1  
2  
3 54 syndrome was polypharmacy (79.86%, 95%CI 76.82-82.60). Four statistically  
4  
5 55 and clinically significant multimorbidity clusters were identified: osteoarticular,  
6  
7 56 psychogeriatric, cardiorespiratory and minor chronic disease. Patient level  
8  
9 57 variables such as sex, Barthel Index, number of chronic conditions or geriatric  
10  
11 58 syndromes, chronic disease exacerbation 3 months prior to admission or  
12  
13 59 destination at discharge differed between clusters.  
14  
15  
16  
17

18 **Conclusions:** In older patients admitted to hospital because of the exacerbation  
19  
20 61 of chronic health problems, it is possible to define multimorbidity clusters using  
21  
22 62 soft clustering techniques. These clusters are clinically relevant and could be the  
23  
24 63 basis to reorganize healthcare circuits or processes to tackle the increasing  
25  
26 64 number of older, multimorbid patients.  
27  
28  
29

30 **Trial registration number** NCT02830425, 12<sup>th</sup> July 2016  
31  
32  
33

34 **Keywords:** Multimorbidity, patterns, soft clustering, older, chronic conditions,  
35  
36 67 geriatric syndromes.  
37  
38

### 39 **Strengths and limitations of this study**

40  
41

- 42 69 - The multimorbidity analysis in this study has been developed considering  
43  
44 70 a wide range of long-term conditions that may require healthcare in older  
45  
46 71 people.  
47  
48 72 - To the best of our knowledge, this is the first published study of  
49  
50 73 multimorbidity clusters in older patients to include chronic diseases  
51  
52 74 weighted by a clinical management score and geriatric syndromes.  
53  
54 75 - Soft clustering is an innovative, methodologically robust technique that can  
55  
56 76 lead to reliable results in the field of multimorbidity analysis.  
57  
58  
59  
60

1  
2  
3 77 - The list of chronic conditions and geriatric syndromes used in this study is  
4  
5 78 comprehensive but not standardized, thus hindering comparability with  
6  
7  
8 79 other studies.  
9

## 10 80 **BACKGROUND**

11  
12  
13  
14 81 According to the most recent Eurostat baseline population projections, old-age  
15  
16 82 dependency ratio (population 65y and over divided by population 15-64y) is about  
17  
18 83 32% in the European Union (EU) and it is expected to reach 52% in 2050,  
19  
20  
21 84 meaning that the EU's population will continue to grow older[1]. Together with  
22  
23 85 the fact that chronic conditions (CC) are the main cause of disability and mortality  
24  
25 86 in Europe, this implies that the coexistence of two or more chronic health  
26  
27 87 conditions, which constitutes the classic definition of multimorbidity, is becoming  
28  
29  
30 88 increasingly common[2].  
31

32  
33 89 Multimorbidity is therefore turning into an important challenge for the health  
34  
35 90 system because of the expanding proportion of older people with multiple CC and  
36  
37 91 treatments as well as the difficulties associated with their clinical  
38  
39 92 management[3,4]. Most clinical practice guidelines are focused on single  
40  
41 93 diseases, with limited recommendations for multimorbid patients[5], and, in  
42  
43 94 addition, randomized clinical trials often exclude older patients with  
44  
45 95 multimorbidity[6]. Despite the importance of multimorbidity in clinical practice,  
46  
47 96 different criteria about which conditions should be considered and how to  
48  
49 97 aggregate them are still under debate, which makes it difficult to compare  
50  
51 98 different estimations around the world[7–9].  
52  
53  
54  
55

56  
57 99 One of the novel, increasingly widespread definitions of multimorbidity considers  
58  
59 100 the non-spurious association of certain CC by sharing pathophysiological

1  
2  
3 101 mechanisms, giving rise to disease association patterns[10]. In order to identify  
4  
5 102 those patterns, different statistical methodologies have been explored. Among  
6  
7 103 these techniques, soft clustering allows to focus on patients rather than  
8  
9 104 diagnoses and is a useful method when there is a high overlap of diagnoses  
10  
11 105 between patients, as it enables patients to belong to more than one multimorbidity  
12  
13 106 pattern with a certain probability[11]  
14  
15  
16

17  
18 107 Besides CC, other clinically relevant situations such as geriatric syndromes (GS)  
19  
20 108 may also be considered in the definition of these patterns, since they might have  
21  
22 109 a great impact on the health-related quality of life and clinical management of old  
23  
24 110 patients[12]. In fact, the purpose of multimorbidity characterization (i.e., predicting  
25  
26 111 outcomes or use of health services, improving quality of care, organizing  
27  
28 112 healthcare services, etc.), will have an influence on its definition. In order to have  
29  
30 113 an accurate picture of the morbidity of each patient, a global consideration of all  
31  
32 114 conditions that may require healthcare attention is necessary, even if they are not  
33  
34 115 the reason for hospitalization. Along these lines, some countries have explicitly  
35  
36 116 recommended to acknowledge all long-term conditions for optimising care of  
37  
38 117 adult patients by reducing, for example, possible inappropriate treatments,  
39  
40 118 multiple healthcare appointments or poor health-related quality of life[13–15].  
41  
42  
43  
44  
45

46 119 During the past decade, there has been an increasing amount of publications that  
47  
48 120 consider multimorbidity[16], but few have focused on multimorbidity patterns in  
49  
50 121 older patients and even fewer take into account GS[17]. For this reason, we  
51  
52 122 launched a multicentre study in 2016 with multiple aims related to multimorbidity,  
53  
54 123 appropriateness of chronic treatments and adverse drug reactions in older  
55  
56 124 patients[18]. The objectives of the present analyses were to estimate the  
57  
58 125 frequency of CC and GS in older patients admitted to hospital because of an  
59  
60

1  
2  
3 126 exacerbation of their CC, and to identify possible multimorbidity patterns in these  
4  
5 127 patients.

## 8 128 **METHODS**

### 10 129 **Design and setting**

11  
12  
13  
14  
15 130 A multicentre, prospective cohort study including older patients hospitalized at  
16  
17 131 the internal medicine or geriatric services at five general teaching hospitals in  
18  
19 132 three different regions of Spain between September 2016 and December 2018  
20  
21  
22 133 was designed. The detailed protocol was previously published[18].

23  
24  
25 134 For the purposes of the study, older patients ( $\geq 65$  years old) admitted as a result  
26  
27 135 of the exacerbation of their chronic pathology were included. Patients referred to  
28  
29 136 home hospitalization, admitted because of an acute process not related to any  
30  
31 137 chronic disease, or with a fatal outcome expected at the time of admission were  
32  
33  
34 138 not included.

35  
36  
37  
38 139 No written informed consent was deemed necessary for this study.

### 39 40 41 140 **Data acquisition and variables**

42  
43  
44 141 The following sociodemographic and clinical data was retrieved by the clinical  
45  
46 142 team responsible for the patient: patient's code, date of birth, sex, functional  
47  
48 143 status just before entering the hospital (Barthel index)[19], household (alone, with  
49  
50 144 relatives or other people, in a nursing home), existence of any contact with  
51  
52 145 healthcare services (primary care, emergencies, hospital admission, outpatient  
53  
54 146 care, home care) in the 3 months prior to hospitalization due to exacerbation of  
55  
56  
57 147 any chronic disease, and destination at discharge from the present episode of  
58  
59  
60

1  
2  
3 148 hospitalization (home, transfer to another hospital, transfer to a nursing home,  
4  
5 149 *exitus*).

6  
7  
8  
9 150 Active CC of the patient at arrival to hospital, including some risk factors, were  
10  
11 151 collected (see Supplemental Table 1). For this purpose, the physicians of the  
12  
13 152 project defined, on a consensual basis, a limited list of 64 CC, coming from the  
14  
15 153 114 groups defined by Salisbury and colleagues[20] and including the 19  
16  
17 154 categories of the Charlson Index[21]. Following the same criteria as Salisbury, a  
18  
19 155 condition was considered to be chronic when it lasted for at least 6 months,  
20  
21 156 including past conditions that require ongoing disease or risk management,  
22  
23 157 important conditions with a significant risk of recurrence, or past conditions that  
24  
25 158 have continuing implications for patient management[20]. Drug-related conditions  
26  
27 159 of this list refer to poor management of medication related to a chronic disease  
28  
29 160 that has clinical implications in that hospitalization (such as any drug intolerance  
30  
31 161 or an excess drug poisoning).

32  
33  
34  
35  
36  
37 162 Additionally, for each of the CC, it was also recorded if they had required clinical  
38  
39 163 management (both at admission and during hospitalization) by assigning a  
40  
41 164 (subjective) correlative score (CM=1, 2, 3...) to each one, according to their  
42  
43 165 clinical importance during the attention process. Thus, CC that did not have any  
44  
45 166 significance during hospitalization, although recorded, had a score equal to zero.  
46  
47  
48 167 This correlative score was later used to compute a ratio to reflect the weight of  
49  
50 168 each CC in each patient in the index hospitalization.

51  
52  
53  
54 169 Specific GS and risk factors (acute confusional syndrome/delirium, chronic pain,  
55  
56 170 cognitive/intellectual impairment, constipation, depression or anxiety, dysphagia,  
57  
58 171 frailty, immobility, incontinence (urinary/faecal), instability/falls, malnutrition,  
59  
60

1  
2  
3 172 polypharmacy, pressure ulcers, sensorial deficit, sleep disorders/insomnia) were  
4  
5 173 also recorded. Two of the departments systematically apply a recently developed  
6  
7 174 scale for frailty [22], while the others consider clinical judgement (although based  
8  
9 175 on the same variables).

10  
11  
12  
13 176 In order to address potential sources of bias, a pilot study was conducted with  
14  
15 177 the first 10 admissions per centre to validate the data collection process and  
16  
17 178 identify problems that could arise. After that, proper changes were made in the  
18  
19 179 protocol and questionnaire. All available information sources were consulted in  
20  
21 180 order to register CC and GS, and the defined list was not closed. Nonetheless,  
22  
23 181 the registration of CC and GS was based on clinical criteria.

## 24 25 26 27 28 182 **Sampling and analysis**

29  
30  
31 183 A consecutive sample of 740 patients meeting the inclusion criteria were  
32  
33 184 included, proportionally distributed to the annual volume of hospitalizations of the  
34  
35 185 medicine and/or geriatric services of each centre. The estimated sample of 800  
36  
37 186 patients (see protocol[18]) could not be reached due to organizational reasons in  
38  
39 187 one of the participating centres.

40  
41  
42  
43 188 For the purposes of the analyses, some CC were grouped according to clinical  
44  
45 189 criteria: Hemiplegia was included in cerebrovascular disease; metastatic solid  
46  
47 190 tumour, leukaemia, lymphoma and any malignancy were grouped into  
48  
49 191 'neoplasia'; hepatitis B and C were included in mild liver disease, and both  
50  
51 192 congestive and non-congestive heart failure were grouped into 'heart failure'.  
52  
53 193 Other diseases were finally excluded of the analyses considering that they have  
54  
55 194 no impact on acute healthcare (cataract, dermatitis, diverticular disease of the  
56  
57  
58  
59  
60

1  
2  
3 195 colon, glaucoma, haemorrhoids, other vascular diseases and prostatic benign  
4  
5 196 hypertrophy). In the end, 51 CC and 15 GS were analysed.  
6  
7

8  
9 197 The updated Charlson Comorbidity Index[23], age adjusted, was computed and  
10  
11 198 categorized according to tertiles distribution.  
12

13  
14 199 Descriptive statistics were performed to assess patient clinical and  
15  
16 200 sociodemographic characteristics and to obtain overall prevalence estimates of  
17  
18 201 CC and GS, stratified by sex. Multimorbidity was firstly defined as the presence  
19  
20 202 of two or more CC. Cumulative number of CC and GS per patient were computed,  
21  
22 203 respectively.  
23

#### 24 25 26 204 *Multimorbidity patterns* 27

28  
29 205 CC or GS with a prevalence <2% were excluded to avoid statistical noise and  
30  
31 206 therefore spurious findings in the cluster solutions, leaving a list of 40 CC and 15  
32  
33 207 GS. In order to take into account if a CC had required clinical management (CM),  
34  
35 208 a ratio variable (R) was computed as follows:  
36  
37

38  
39 209 If  $CC=0$  &  $CM=0 \rightarrow R=0$   
40

41  
42 210 If  $CC=1$  &  $CM=m \rightarrow R=1/m$ ;  $\max(m) = \max \text{value}(CM) = 8$ ;  
43  
44

45  
46 211 If  $CC=1$  &  $CM=0 \rightarrow R=0.1$   
47

48  
49 212 Multimorbidity patterns were identified using the fuzzy c-means cluster analysis  
50  
51 213 algorithm, which belongs to the family of *soft* clustering algorithms. The algorithm  
52  
53 214 estimates  $c$  cluster centres (similar to  $k$ -means) but with fuzziness so that  
54  
55 215 individuals may belong to more than one pattern. Through this technique, we  
56  
57  
58  
59  
60



1  
2  
3 216 obtained clusters of individuals and a membership matrix, which indicates the  
4  
5 217 degree of participation of each subject in each cluster.  
6  
7

8 218 As a first step, and similarly to Violán *et. al.*[24], the PCAmix algorithm for  
9  
10 219 categorical and continuous data (GS and R variables respectively) was  
11  
12 220 implemented to reduce and transform the dataset to all continuous data[25]. To  
13  
14 221 decide the number of retained dimensions, the Karlis-Saporta-Spinaki rule was  
15  
16 222 used[26]. Then, a soft clustering algorithm was applied to fuzzily distribute the  
17  
18 223 population into a set of clusters, corresponding to the different multimorbidity  
19  
20 224 patterns. We computed three validation indices to obtain the optimal number of  
21  
22 225 clusters ( $K$ ) and the optimal value of the fuzziness parameter ( $m$ ): the partition  
23  
24 226 coefficient whose optimal choice for coefficient is at the maximum, and the Xie-  
25  
26 227 Beni and the partition entropy validation indices, whose optimal indices are at the  
27  
28 228 minimum[27]. Considering the stochastic nature of the clusters, and the  
29  
30 229 requirement of stable multimorbidity clusters, 100 independent clustering  
31  
32 230 repetitions were applied to obtain the stable final solution.  
33  
34  
35  
36  
37  
38

39 231 To describe each identified cluster of individuals, the prevalence of CC and GS  
40  
41 232 in each one was calculated. Observed/expected (O/E) ratios were calculated by  
42  
43 233 dividing the prevalence of a given disease within a cluster by its prevalence in the  
44  
45 234 overall population. The exclusivity of CC and GS, defined as the fraction of  
46  
47 235 patients with the disease in the cluster over the total number of patients with the  
48  
49 236 disease, was also calculated. A CC or a GS was considered to be relevant in a  
50  
51 237 given cluster of individuals when its O/E ratio was  $>1$  and its exclusivity was  
52  
53 238  $>25\%$ [28–30]. The statistical significant final solution ranged from 4 to 8 clusters.  
54  
55  
56  
57 239 After clinical revision and discussion among the research team, 4 different  
58  
59 240 clusters were considered to be consistent with the clinical observations as well  
60

241 as the objective of the clustering. There is currently no consensus in the literature  
 242 on the criteria used to select the number of clusters or the O/E ratio cut-off point  
 243 due to, in part, the novelty of the analysis.

244 Finally, sociodemographic and clinical variables were described for all patients  
 245 assigned to each cluster. Analyses were performed using R 3.6.0 and SPSS 22.

## 246 Patient and Public Involvement

247 Since this was an observational study with variables and outcomes related to the  
 248 healthcare process, this research was developed without patient involvement.  
 249 Patients were not invited to comment on the study design and were not consulted  
 250 to develop patient relevant outcomes or interpret the results.

## 251 RESULTS

252 740 patients aged 65 years or older were included, with a mean age of 84.12  
 253 years (SD 7.01), a 53.24% of females and a mean Barthel Index of 65.07 (median  
 254 75). Sociodemographic and clinical variables are summarised in Table 1. Almost  
 255 all patients had two or more CC (98.65%; 95%CI 98.23-99.07), with a median of  
 256 8 CC and 6 GS per patient. Nearly 70% had consulted a health care service in  
 257 the 3 months prior to hospitalization due to chronic disease exacerbation.

258 Table 1. Sociodemographic and clinical variables of the studied cohort.

| Sociodemographic and clinical variables | N      | %   | 95% CI |               |
|-----------------------------------------|--------|-----|--------|---------------|
| Age                                     | < 70   | 33  | 4.46   | 3.19 - 6.20   |
|                                         | 70-74  | 48  | 6.49   | 4.93 - 8.50   |
|                                         | 75-79  | 82  | 11.08  | 9.02 - 13.55  |
|                                         | 80-84  | 181 | 24.46  | 21.50 - 27.68 |
|                                         | 85-89  | 232 | 31.35  | 28.11 - 34.78 |
|                                         | 90-94  | 134 | 18.11  | 15.50 - 21.05 |
| Sex                                     | >= 95  | 30  | 4.05   | 2.85 - 5.73   |
|                                         | Female | 394 | 53.24  | 49.64 - 56.81 |

1  
2  
3  
4  
5  
6  
7  
8  
9  
10  
11  
12  
13  
14  
15  
16  
17  
18  
19  
20  
21  
22  
23  
24  
25  
26  
27  
28  
29  
30  
31  
32  
33  
34  
35  
36  
37  
38  
39  
40  
41  
42  
43  
44  
45  
46  
47  
48  
49  
50  
51  
52  
53  
54  
55  
56  
57  
58  
59  
60

| Sociodemographic and clinical variables                     |                             | N   | %     | 95% CI        |
|-------------------------------------------------------------|-----------------------------|-----|-------|---------------|
|                                                             | Male                        | 346 | 46.76 | 43.19 - 50.36 |
| Barthel index                                               | < 20                        | 90  | 12.16 | 10.00 - 14.71 |
|                                                             | 20-35                       | 76  | 10.27 | 8.28 - 12.67  |
|                                                             | 40-55                       | 124 | 16.76 | 14.24 - 19.62 |
|                                                             | 60-95                       | 294 | 39.73 | 36.27 - 43.30 |
|                                                             | 100                         | 156 | 21.08 | 18.30 - 24.17 |
| Age adjusted, updated Charlson Comorbidity Index            | 2-5                         | 148 | 20.00 | 17.28 - 23.03 |
|                                                             | 6-8                         | 411 | 55.54 | 51.94 - 59.08 |
|                                                             | 9-14                        | 181 | 24.46 | 21.50 - 27.68 |
| Household                                                   | With relatives/other people | 523 | 70.68 | 67.30 - 73.84 |
|                                                             | Nursing home                | 95  | 12.84 | 10.62 - 15.44 |
|                                                             | Alone                       | 122 | 16.49 | 13.99 - 19.33 |
| Chronic disease exacerbation<br>3 months prior to admission | No                          | 225 | 30.41 | 27.20 - 33.81 |
|                                                             | Yes (total)                 | 515 | 69.59 | 66.19 - 72.80 |
|                                                             | Primary care                | 342 | 46.22 | 42.65 - 49.82 |
|                                                             | Emergencies                 | 263 | 35.54 | 32.17 - 39.06 |
|                                                             | Hospital admission          | 193 | 26.08 | 23.05 - 29.36 |
|                                                             | Outpatient care             | 8   | 1.08  | 0.55 - 2.12   |
| Conditions requiring clinical management (CM)               | Home care                   | 14  | 1.89  | 1.13 - 3.15   |
|                                                             | 1                           | 302 | 40.81 | 37.36 - 44.39 |
|                                                             | 2                           | 216 | 29.19 | 26.03 - 32.57 |
|                                                             | 3                           | 106 | 14.32 | 11.98 - 17.03 |
|                                                             | 4                           | 72  | 9.73  | 7.80 - 12.08  |
|                                                             | 5                           | 28  | 3.78  | 2.63 - 5.41   |
|                                                             | 6                           | 13  | 1.76  | 1.03 - 2.98   |
|                                                             | 7                           | 2   | 0.27  | 0.07 - 0.98   |
| Destination at discharge                                    | 8                           | 1   | 0.14  | 0.007 - 0.76  |
|                                                             | Home                        | 468 | 63.24 | 59.71 - 66.64 |
|                                                             | Nursing home                | 105 | 14.19 | 11.86 - 16.89 |
|                                                             | Another hospital            | 101 | 13.65 | 11.36 - 16.31 |
| Multimorbidity                                              | Exitus                      | 66  | 8.92  | 7.07 - 11.19  |
|                                                             | No                          | 10  | 1.35  | 1.35 - 1.36   |
|                                                             | Yes                         | 730 | 98.65 | 98.23 - 99.07 |

259 CI = Confidence interval

260 Figure 1 shows the distribution of the number of CC by age groups. The most  
 261 frequent CC were hypertension (81.49%, 95%CI 78.53-84.12) and heart failure  
 262 (59.86%, 95%CI 56.29-63.34) (see Supplemental Table 2). Heart failure was also  
 263 the main cause of hospitalization (30.7% of patients had CM score=1), followed  
 264 by COPD (20.7%) (Supplemental Table 3).

265 There were some differences in CC between sexes, with females having more  
 266 frequently heart failure, degenerative arthropathy, obesity, hip fracture, thyroid  
 267 disease, asthma, osteoporosis, vertigo and non-schizophrenic mental disorders.  
 268 Males, in turn, had more frequently COPD, gout, neoplasia, peripheral  
 269 arteriopathy and ulcerative disease.

270 The most prevalent GS was polypharmacy (79.86%, 95%CI 76.82-82.60),  
 271 followed by frailty (61.76%, 95%CI 58.20-65.19). Females had a significantly  
 272 higher number of GS compared to males (Wilcoxon rank sum test,  $p < 0.001$ ), as  
 273 well as a higher prevalence of depression/anxiety, chronic pain, constipation,  
 274 frailty, urinary/faecal incontinence and immobility.

275 Four statistically and clinically significant multimorbidity clusters or patterns were  
 276 identified in our study population. For all clusters, CC and GS with an  
 277 observed/expected ratio  $>1$  and exclusivity  $>25\%$  are represented in Figure 2  
 278 (see also Supplemental Table 4 for all CC and GS). Sociodemographic and  
 279 clinical characteristics of patients in each cluster are described in Table 2.

280 Table 2. Sociodemographic and clinical variables of the multimorbidity clusters.

|                                                             |                               | Osteoarticular    | Psycho-geriatric  | Minor chronic conditions | Cardio-respiratory |
|-------------------------------------------------------------|-------------------------------|-------------------|-------------------|--------------------------|--------------------|
| Number of patients included, n (%)                          |                               | 132 (17.8)        | 153 (20.7)        | 179 (24.2)               | 276 (37.3)         |
| Age at admission (y, mean $\pm$ SD)                         |                               | 84.03 $\pm$ 6.48  | 84.51 $\pm$ 7.25  | 83.94 $\pm$ 7.19         | 84.06 $\pm$ 7.03   |
| Sex, n (%)                                                  | Male                          | 34 (25.7)         | 66 (42.8)         | 99 (55.5)                | 147 (53.4)         |
|                                                             | Female                        | 98 (74.3)         | 87 (57.2)         | 80 (44.5)                | 129 (46.6)         |
| Barthel Index (mean $\pm$ SD)                               |                               | 63.06 $\pm$ 24.78 | 47.62 $\pm$ 34.94 | 64.96 $\pm$ 33.56        | 75.76 $\pm$ 27.52  |
| Total n° chronic conditions (mean $\pm$ SD)                 |                               | 11.5 $\pm$ 3.64   | 7.68 $\pm$ 3.19   | 8.86 $\pm$ 3.08          | 7.59 $\pm$ 2.61    |
| Total n° geriatric syndromes / risk factors (mean $\pm$ SD) |                               | 7.76 $\pm$ 2.07   | 8.16 $\pm$ 2.82   | 6.4 $\pm$ 3.32           | 4.42 $\pm$ 2       |
| Charlson Comorbidity Index, n (%)                           | 2-5                           | 26 (19.9)         | 24 (15.6)         | 37 (20.4)                | 61 (22.2)          |
|                                                             | 6-8                           | 73 (55.1)         | 89 (58.5)         | 96 (53.8)                | 153 (55.3)         |
|                                                             | 9-14                          | 33 (25.0)         | 40 (25.9)         | 46 (25.7)                | 62 (22.6)          |
| Household, n (%)                                            | With relatives / other people | 91 (68.7)         | 103 (67.2)        | 133 (74.5)               | 196 (71.1)         |

|                                                                           |                    | Osteoarticular | Psycho-geriatric | Minor chronic conditions | Cardio-respiratory |
|---------------------------------------------------------------------------|--------------------|----------------|------------------|--------------------------|--------------------|
|                                                                           | Nursing home       | 16 (11.8)      | 28 (18.4)        | 23 (12.8)                | 28 (10.3)          |
|                                                                           | Alone              | 26 (19.5)      | 22 (14.3)        | 23 (12.7)                | 52 (18.7)          |
| Chronic disease exacerbation 3 months prior to the index admission, n (%) | No                 | 24 (18.3)      | 46 (30.1)        | 48 (27.0)                | 106 (38.5)         |
|                                                                           | Yes (total)        | 108 (81.7)     | 107 (69.9)       | 130 (73.0)               | 170 (61.5)         |
|                                                                           | Primary care       | 83 (62.7)      | 66 (43.3)        | 92 (51.6)                | 101 (36.5)         |
|                                                                           | Emergencies        | 71 (53.6)      | 40 (26.2)        | 69 (38.5)                | 83 (30.2)          |
|                                                                           | Hospital admission | 49 (37.1)      | 46 (30.1)        | 47 (26.1)                | 51 (18.6)          |
|                                                                           | Outpatient care    | 1 (0.7)        | 0 (0.3)          | 3 (1.4)                  | 4 (1.4)            |
|                                                                           | Home care          | 2 (1.5)        | 2 (1.1)          | 3 (1.8)                  | 7 (2.6)            |
| Destination at discharge, n (%)                                           | Home               | 86 (65.3)      | 83 (54.0)        | 111 (62.0)               | 188 (68.1)         |
|                                                                           | Nursing home       | 15 (11.1)      | 33 (21.3)        | 26 (14.5)                | 32 (11.5)          |
|                                                                           | Another hospital   | 15 (11.3)      | 17 (11.3)        | 26 (14.7)                | 42 (15.3)          |
|                                                                           | Exitus             | 16 (12.3)      | 20 (13.3)        | 16 (8.8)                 | 14 (4.9)           |

281 SD = standard deviation.

282 The first cluster, named *osteoarticular*, included 132 patients (17.8%) having  
 283 osteoporosis, fractures, inflammatory osteoarticular disease, chronic pain and  
 284 degenerative arthropathy. Moreover, vertigo, sleep apnoea, asthma,  
 285 depression/anxiety and sleep disorders were also over-represented. This cluster  
 286 included patients with the highest number of both CC and GS. About three  
 287 quarters were female, and most of them (82%) accessed healthcare services 3  
 288 months prior to this admission.

289 Cluster 2, called *psychogeriatric*, had 152 patients (20.7%) and included mostly  
 290 GS: pressure ulcers, immobility, malnutrition, cognitive impairment, dementia,  
 291 incontinence and frailty. Patients in this group had a mean Barthel index lower  
 292 than 50 and a high number of GS. Furthermore, nearly 20% of them were living  
 293 in a nursing home and in-hospital mortality was about 13%.

294 Cluster 3, named *minor chronic disease*, had 179 (24.2%) patients, and  
 295 represents a group of patients with a variety of conditions, such as hypertension,  
 296 dyslipidaemia, anaemia, gout, chronic renal insufficiency, polypharmacy, non-

1  
2  
3 297 ischaemic heart disease, and diverse GS. O/E ratios were close to 1 in most  
4  
5 298 cases.  
6  
7

8  
9 299 Finally, cluster 4, called *cardiorespiratory*, included 276 (37.3%) patients. The  
10  
11 300 over-represented diagnoses were COPD, heart failure and cardiac arrhythmia,  
12  
13 301 although the O/E ratios were very low. In this cluster, with the lowest number of  
14  
15 302 CC and GS, and a Barthel index greater than 75, nearly 40% had no healthcare  
16  
17 303 consultation for a chronic disease exacerbation in the previous 3 months. This  
18  
19 304 group had the lowest in-hospital mortality (5%).  
20  
21  
22

## 23 305 **DISCUSSION**

24  
25  
26 306 The present study aimed to identify multimorbidity patterns in patients aged 65  
27  
28 307 and above admitted to hospital because of an exacerbation of CC. The soft  
29  
30 308 clustering technique used, together with clinical criteria, was able to identify 4  
31  
32 309 different multimorbidity patterns, named osteoarticular, psychogeriatric, cardio-  
33  
34 310 respiratory and minor chronic disease, in a patient-centred approach taking into  
35  
36 311 account the importance of each disease in hospital management. Remarkably,  
37  
38 312 high chronic multimorbidity was found in all patients, regardless of the cluster. To  
39  
40 313 the best of our knowledge, this is the only study published to date that has  
41  
42 314 analysed multimorbidity patterns taking into account both CC (with their weight  
43  
44 315 during clinical management) and GS in this type of patients. Hence, these  
45  
46 316 identified patterns allow us to take a further step towards understanding the  
47  
48 317 patients' current or future healthcare needs.  
49  
50  
51  
52  
53

54  
55 318 Two very important aspects of multimorbidity patterns analysis are the purpose  
56  
57 319 for designing such patterns and the target population, which clearly condition the  
58  
59 320 obtained results or conclusions. For instance, our aim in defining multimorbidity  
60

1  
2  
3 321 patterns in this cohort was to identify profiles of patients with similar clinical needs  
4  
5 322 during the index hospitalization and even a similar short-term prognosis at that  
6  
7 323 time. For this reason, the importance of their pathologies in the course of  
8  
9 324 hospitalization was also taken into account. Hence, the ones that tend to have a  
10  
11 325 minimal impact on clinical management, such as risk factors like hypertension or  
12  
13 326 dyslipidaemia did not have a leading role in the patterns.  
14  
15  
16

17 327 All clusters contain coherent groups of conditions that are mostly  
18  
19 328 pathophysiologically related. From the clinical point of view, these clusters  
20  
21 329 resemble patient profiles that are intuitively perceived. Moreover, some  
22  
23 330 descriptive variables such as sex, Barthel index, mean number of CC or GS,  
24  
25 331 chronic pathology exacerbations in previous months, or hospital mortality, are  
26  
27 332 distributed in such a way that they may reinforce the distinction of these groups.  
28  
29  
30

31  
32 333 Coexistence of CC and GS was observed in all clusters except for the  
33  
34 334 cardiorespiratory, reinforcing the need to consider other clinically relevant  
35  
36 335 situations rather than only CC. In particular, the exclusivity and prevalence of GS  
37  
38 336 such as immobility, malnutrition, cognitive impairment or dementia were  
39  
40 337 considerable in the psychogeriatric cluster.  
41  
42  
43

44 338 Interestingly, highly prevalent CC, such as heart failure and COPD, which also  
45  
46 339 frequently involve clinical management, only showed remarkable exclusivity and  
47  
48 340 O/E ratio in the cardiorespiratory pattern and were not over-represented  
49  
50 341 elsewhere. This highlights the fact that even though some CC may not be over-  
51  
52 342 represented in a cluster, they can have a high prevalence and therefore need to  
53  
54 343 be properly addressed too.  
55  
56  
57  
58  
59  
60

1  
2  
3 344 With respect to the osteoarticular cluster, it displayed a pattern of female  
4  
5 345 predominance, with many CC and GS, high healthcare needs in recent months  
6  
7 346 due to their chronic pathology, and high in-hospital mortality. Thus, this profile  
8  
9 347 would identify a group of patients with a high probability of decompensation and  
10  
11 348 death.

12  
13  
14  
15 349 Finally, the so-called minor chronic diseases cluster was not very well defined. It  
16  
17 350 included some risk factors (hypertension, dyslipidaemia, polypharmacy) as well  
18  
19 351 as some CC and GS. Thus, it would be possible that it does not represent a real  
20  
21 352 cluster but either the set of cases that did not belong anywhere else.

### 22 23 24 25 353 Comparison with other studies

26  
27  
28 354 Given the type of patients under study and the methodological approach to  
29  
30 355 identify multimorbidity patterns, there are few publications to directly compare our  
31  
32 356 results to. Clerencia-Sierra and colleagues[17] analysed multimorbidity patterns  
33  
34 357 in hospitalized older patients. Their methodological and analytical approach was  
35  
36 358 slightly different, and they did not take into account the weight of the diseases  
37  
38 359 during the hospitalization process; however, they found a similar percentage of  
39  
40 360 multimorbidity (99.7%) and 4 patterns that partially coincide with those of our  
41  
42 361 study: cardiovascular, induced-dependency, falls, and osteoarticular.

43  
44  
45  
46  
47 362 Furthermore, several authors have published data on patterns identified from  
48  
49 363 primary care electronic records in different age groups, with lists of non-  
50  
51 364 comparable chronic problems and using different techniques (cluster analysis,  
52  
53 365 exploratory factor analysis or latent class analysis)[17,29–34]. These results  
54  
55 366 would not be directly comparable with our study, but all of them highlight the  
56  
57 367 ability to identify association patterns of chronic diseases.  
58  
59  
60



1  
2  
3 368 Strengths and limitations  
4  
5

6 369 The strengths of this study are the prospective design, ensuring data quality by  
7  
8 370 thorough record keeping, the ascertainment of all CC and GS of the patient, as  
9  
10 371 well as the use of a novel clustering technique. Soft clustering is a  
11  
12 372 methodologically robust technique less susceptible to outliers in the data, choice  
13  
14 373 of distance measure and the inclusion of inappropriate or irrelevant variables[24].  
15  
16 374 Besides, our approach focuses beyond organ diseases by incorporating GS, and  
17  
18 375 using a comprehensive list retrieved by the clinical team. Additionally, we have  
19  
20 376 taken into account the relative importance of the different CC in the clinical  
21  
22 377 management of the patient during hospitalization, thus providing a better picture  
23  
24 378 of the possible complexity and needs during hospitalization.  
25  
26  
27  
28  
29

30 379 Furthermore, our work is not only limited to the identification of possible patterns.  
31  
32 380 We have validated them, in some way, by analysing some of the patients'  
33  
34 381 variables such as sex, number of CC, previous contacts with the health system,  
35  
36 382 hospital mortality or need for a nursing home.  
37  
38  
39

40 383 Nonetheless, our study presents some limitations that need to be considered.  
41  
42 384 Firstly, the identification of chronic pathologies does not exclusively follow a  
43  
44 385 validated list of codes but either an adaptation of different ones, a fact that could  
45  
46 386 hinder comparability with other studies on multimorbidity. Secondly, as this study  
47  
48 387 is not longitudinal, the chronology in which CC or GS appear cannot be analysed.  
49  
50 388 It is possible for a patient to evolve from one pattern to another throughout life,  
51  
52 389 as some authors have already pointed out[35], and therefore, the results only  
53  
54 390 show the present situation. However, given the purpose of the defined patterns,  
55  
56 391 this would not in itself be a limitation.  
57  
58  
59  
60

1  
2  
3 392 From a clinical point of view, the lack of usage of standard scales or diagnostic  
4  
5 393 criteria for determining all CC or GS could question the validity of this information.  
6  
7 394 However, the study gathered the data as it was routinely registered in the different  
8  
9 395 departments. Frailty should derive from a comprehensive assessment of the  
10  
11 396 patient in a standardized way that still lacks of systematic implementation in the  
12  
13 397 healthcare routine[36]. Nevertheless, our multimorbidity study wanted to go a little  
14  
15 398 further, also considering GS (frailty included), an unusual fact in the bibliography  
16  
17 399 on clusters of multimorbidity in older patients in spite of its importance for decision  
18  
19 400 making in the clinical practice.

20  
21  
22  
23  
24 401 The clinical conditions severity or other possible aggravating factors have neither  
25  
26 402 been gathered. Nevertheless, the registration of a variable that takes into account  
27  
28 403 the relevance of each CC during the care process acts, in some way, as a proxy  
29  
30 404 of the importance of each disease in the index hospitalization when dealing with  
31  
32 405 patients admitted because of decompensation. Considering the purpose of  
33  
34 406 defining the patterns in the whole study, and not knowing useful precedents in  
35  
36 407 the consulted bibliography, the assignment made by the medical professional  
37  
38 408 who attended the patient was an easy, simple measure, and shared by all  
39  
40 409 professionals at the time of writing the clinical course.

#### 41 Clinical implications

42  
43  
44  
45  
46  
47  
48  
49 411 These patterns are not a picture of the community but of older patients in geriatric  
50  
51 412 or internal medicine departments, which are generally in more need of health  
52  
53 413 services and more complex clinical management. However, not all of these  
54  
55 414 patients have the same requirements. In fact, one in five patients (the  
56  
57 415 psychogeriatric cluster) caused a great burden to both the patient and their  
58  
59  
60

1  
2  
3 416 relatives while the patients in the most frequent cluster (cardiorespiratory), with  
4  
5 417 lower dependency and less GS, seemed to have better immediate outcome.  
6  
7 418 Therefore, it is possible that the therapeutic objectives should be different in these  
8  
9 419 patients. More importantly, the ability to distinguish patients more objectively than  
10  
11 420 with the mere clinical impression may allow the design of better processes,  
12  
13 421 services or alternatives to conventional hospitalization. Indeed, the identification  
14  
15 422 of multimorbidity patterns in subsets of the population in order to detect  
16  
17 423 underlying factors, understand their burden on patients and develop preventive  
18  
19 424 strategies is considered a research priority. Finally, the development of clinical  
20  
21 425 practice guidelines according to these patterns needs to be considered, although  
22  
23 426 it may be difficult given the magnitude of the diseases comprised in each pattern  
24  
25 427 [4,14]. In addition, some patterns may include patients with an increased risk of  
26  
27 428 potentially inappropriate prescription or adverse drug reactions. These aspects  
28  
29 429 will be the object of future analyses.  
30  
31  
32  
33  
34  
35

## 36 430 **Conclusions**

37  
38  
39 431 In conclusion, in older patients admitted to hospital because of the exacerbation  
40  
41 432 of chronic health problems, it is possible to define multimorbidity clusters or  
42  
43 433 patterns using appropriate statistical techniques. These patterns seem clinically  
44  
45 434 coherent and could be the basis to reorganize circuits, processes or healthcare  
46  
47 435 models to tackle the increasing number of older, multimorbid patients.  
48  
49  
50

## 51 436 **List of abbreviations**

52  
53  
54 437 CC: chronic condition

55  
56  
57 438 GS: geriatric syndrome  
58  
59  
60

1  
2  
3 439 CM: clinical management  
4  
5

6 440 O/E: observed/expected  
7  
8

9 441 COPD: chronic obstructive pulmonary disease  
10  
11

## 12 442 **Figure captions**

13  
14

15 443 Figure 1. Distribution of the number of chronic conditions (excluding the following  
16  
17 444 risk factors: hypertension, dyslipidaemia, obesity, osteoporosis and drug-related  
18  
19 445 conditions) in relation to age groups.  
20  
21  
22

23 446 Figure 2. Observed/Expected (O/E) ratio and prevalence of chronic conditions  
24  
25 447 and geriatric syndromes/risk factors per multimorbidity cluster. Conditions with  
26  
27 448 exclusivity >25% and O/E ratios >1 in each cluster are represented. Conditions  
28  
29 449 are ordered by O/E ratio and from cluster 1 to 4. *COPD: Chronic Obstructive*  
30  
31  
32 450 *Pulmonary Disease*  
33  
34  
35

## 36 451 **Ethics approval statement**

37  
38

39 452 This study was approved by the clinical research ethics committees of each  
40  
41 453 centre: Comité Ético de investigación Clínica del Parc Taulí, Comitè Ètic  
42  
43 454 d'Investigació Clínica Osona per a la Recerca i Educació Sanitàries (FORES),  
44  
45 455 Comité de Ètica de la Investigación con Medicamentos (CEIm)-Parc de Salut  
46  
47 456 MAR, Comité Ético de Investigación Clínica de Euskadi, Comité de Ètica de  
48  
49 457 Investigación del Hospital Universitario de Canarias. No written informed consent  
50  
51  
52 458 was deemed necessary for this study.  
53  
54  
55

## 56 459 **Funding**

57  
58  
59  
60

1  
2  
3 460 This work was supported by grants from Instituto de Salud Carlos III-FEDER,  
4  
5 461 [PI15/00552] and by the Network for Research into Healthcare in Chronic  
6  
7 462 Diseases, REDISSEC (RD16/0001/0002). These funding bodies had no role in  
8  
9 463 the design of the study, nor in the collection, analysis and interpretation of data  
10  
11 464 nor in writing the manuscript.  
12  
13  
14

### 15 465 **Competing interests**

16  
17  
18 466 The authors declare that they have no competing interests.  
19  
20

### 21 467 **Data sharing statement**

22  
23  
24 468 The datasets used and/or analysed during the current study are available from  
25  
26 469 the corresponding author upon reasonable request.  
27  
28  
29

### 30 470 **Authors' contributions**

31  
32  
33 471 MB conceived and supervised the study, discussed the results, wrote the first  
34  
35 472 version of the manuscript. SH, RJ, MA, RE and GJN participated in patient  
36  
37 473 inclusion, data collection and discussion of the results and revised the  
38  
39 474 manuscript. AR executed the analysis and interpretation of multimorbidity  
40  
41 475 clusters. CV collaborated in the execution of the analyses and in the interpretation  
42  
43 476 of the multimorbidity patterns. ML participated in the statistical and graphical  
44  
45 477 analysis of the results, in the discussion of the results and the revision of several  
46  
47 478 manuscript versions. PR collaborated in the questionnaires' design, patient  
48  
49 479 inclusion, data collection and discussion of results and revised the manuscript.  
50  
51  
52 480 All authors read and approved the final manuscript.  
53  
54  
55  
56

### 57 481 **Acknowledgements**

1  
2  
3 482 The authors acknowledge the dedication and support of the entire MoPIM  
4  
5 483 research group, listed by institution:  
6  
7

8 484 *Parc Taulí University Hospital*: Marisa Baré (Clinical Epidemiology and Cancer  
9  
10 485 Screening; REDISSEC), Susana Herranz (Acute care Geriatric Unit), Rosa  
11  
12 486 Jordana (Department of Internal Medicine), Maria Queralt Gorgas (Pharmacy  
13  
14 487 Department, REDISSEC), Sara Ortonobes (Pharmacy Department), Marina Lleal  
15  
16 488 (Fundació Parc Taulí, REDISSEC);  
17  
18

19  
20 489 *University Hospital of Vic*: Pere Roura-Poch (Epidemiology Unit; REDISSEC),  
21  
22 490 Daniel Sevilla, Núria Solà and Javier González (Pharmacy Department), Núria  
23  
24 491 Molist, Mariona Espauella (Department of Geriatrics); Oscar Mascaró  
25  
26 492 (Department of Internal Medicine);  
27  
28

29  
30 493 *Hospital del Mar Medical Research Institute-IMIM*: Elisabet de Jaime (Geriatrics  
31  
32 494 Department), Olivia Ferrandez (Pharmacy Department), Maria Sala (Department  
33  
34 495 of Epidemiology and Evaluation, REDISSEC), Miguel Ángel Márquez, Marta  
35  
36 496 Arellano, Carlos Clemente and Olga Sabartés (Department of Geriatrics), Núria  
37  
38 497 Carballo and Marta de Antonio (Pharmacy Department);  
39  
40

41  
42 498 *Hospital de Galdakao*: Rafael Estrada (Department of Internal Medicine), Maria  
43  
44 499 Olatz Ibarra (Pharmacy Department);  
45  
46

47  
48 500 *Complejo Hospitalario Universitario de Canarias*: Candelaria Martin (Department  
49  
50 501 of Internal Medicine), Gloria Julia Nazco (Pharmacy Department), Rubén  
51  
52 502 Hernández (Department of Internal Medicine).  
53  
54

55  
56 503 We are grateful to Sandra Prados, Antonio Gimeno and Beatriz Poblador for their  
57  
58 504 insightful comments, as well as to Blanca Rovira for her literature review as part  
59  
60

1  
2  
3  
4  
5  
6  
7  
8  
9  
10  
11  
12  
13  
14  
15  
16  
17  
18  
19  
20  
21  
22  
23  
24  
25  
26  
27  
28  
29  
30  
31  
32  
33  
34  
35  
36  
37  
38  
39  
40  
41  
42  
43  
44  
45  
46  
47  
48  
49  
50  
51  
52  
53  
54  
55  
56  
57  
58  
59  
60

505 of the final project of her medical degree at UAB, and to Celia Corral, for helping  
506 in tables and figures editing.

507

For peer review only

508 **REFERENCES**

- 509 1 Eurostat - Data Explorer.  
510 [https://appsso.eurostat.ec.europa.eu/nui/show.do?dataset=tps00200&lan](https://appsso.eurostat.ec.europa.eu/nui/show.do?dataset=tps00200&lang=en)  
511 [g=en](https://appsso.eurostat.ec.europa.eu/nui/show.do?dataset=tps00200&lang=en) (accessed 21 Oct 2020).
- 512 2 OECD/EU. Health at a Glance: Europe 2018 State of Health in the EU  
513 Cycle. 2018. doi:10.1787/health\_glance\_eur-2018-en
- 514 3 Palladino R, Pennino F, Finbarr M, *et al.* Multimorbidity And Health  
515 Outcomes In Older Adults In Ten European Health Systems, 2006-15.  
516 *Health Aff (Millwood)* 2019;**38**:613–23. doi:10.1377/hlthaff.2018.05273
- 517 4 The Academy of Medical Sciences. Multimorbidity: a priority for global  
518 health research. 2018. <https://acmedsci.ac.uk/file-download/82222577>
- 519 5 Lugtenberg M, Burgers JS, Clancy C, *et al.* Current guidelines have limited  
520 applicability to patients with comorbid conditions: A systematic analysis of  
521 evidence-based guidelines. *PLoS One* 2011;**6**.  
522 doi:10.1371/journal.pone.0025987
- 523 6 Buffel du Vaure C, Dechartres A, Battin C, *et al.* Exclusion of patients with  
524 concomitant chronic conditions in ongoing randomised controlled trials  
525 targeting 10 common chronic conditions and registered at  
526 ClinicalTrials.gov: A systematic review of registration details. *BMJ Open*  
527 2016;**6**:e012265. doi:10.1136/bmjopen-2016-012265
- 528 7 Fortin M, Stewart M, Poitras ME, *et al.* A systematic review of prevalence  
529 studies on multimorbidity: Toward a more uniform methodology. *Ann Fam*  
530 *Med* 2012;**10**:142–51. doi:10.1370/afm.1337



- 1  
2  
3 531 8 Diederichs C, Berger K, Bartels DB. The measurement of multiple chronic  
4  
5 532 diseases - A systematic review on existing multimorbidity indices. *J*  
6  
7 533 *Gerontol A Biol Sci Med Sci* 2011;**66**:301–11. doi:10.1093/gerona/glq208  
8  
9  
10  
11 534 9 Roso-Llorach A, Violán C, Foguet-Boreu Q, *et al.* Comparative analysis of  
12  
13 535 methods for identifying multimorbidity patterns: A study of ‘real-world’ data.  
14  
15 536 *BMJ Open* 2018;**8**:e018986. doi:10.1136/bmjopen-2017-018986  
16  
17  
18 537 10 Prados-Torres A, Calderón-Larrañaga A, Hanco-Saavedra J, *et al.*  
19  
20 538 Multimorbidity patterns: A systematic review. *J Clin Epidemiol*  
21  
22 539 2014;**67**:254–66. doi:10.1016/j.jclinepi.2013.09.021  
23  
24  
25  
26 540 11 Jyoti Bora D, Kumar Gupta A. A Comparative study Between Fuzzy  
27  
28 541 Clustering Algorithm and Hard Clustering Algorithm. *Int J Comput Trends*  
29  
30 542 *Technol* 2014;**10**.<http://www.ijctjournal.org> (accessed 26 Aug 2021).  
31  
32  
33  
34 543 12 Lu FP, Chang WC, Wu SC. Geriatric conditions, rather than multimorbidity,  
35  
36 544 as predictors of disability and mortality among octogenarians: A population-  
37  
38 545 based cohort study. *Geriatr Gerontol Int* 2016;**16**:345–51.  
39  
40 546 doi:10.1111/ggi.12480  
41  
42  
43  
44 547 13 van der Heide I, Snoeijis SP, Boerma WGW, *et al.* How to strengthen  
45  
46 548 patient-centredness in caring for people with multimorbidity in Europe?  
47  
48 549 2017.<http://europepmc.org/books/NBK464537>  
49  
50  
51  
52 550 14 Rijken M, Struckmann V, Van Der Heide I, *et al.* How to improve care for  
53  
54 551 people with multimorbidity in Europe? 2016.  
55  
56 552 [https://www.euro.who.int/en/about-](https://www.euro.who.int/en/about-us/partners/observatory/publications/policy-briefs-and-summaries/how-to-)  
57  
58 553 [us/partners/observatory/publications/policy-briefs-and-summaries/how-to-](https://www.euro.who.int/en/about-us/partners/observatory/publications/policy-briefs-and-summaries/how-to-)  
59  
60

- 1  
2  
3 554 improve-care-for-people-with-multimorbidity-in-europe  
4  
5  
6 555 15 NICE. Multimorbidity: clinical assessment and management NICE  
7  
8 556 guideline. 2016. [www.nice.org.uk/guidance/ng56](http://www.nice.org.uk/guidance/ng56)  
9  
10  
11 557 16 Catalá-López F, Alonso-Arroyo A, Page MJ, *et al.* Mapping of global  
12  
13 scientific research in comorbidity and multimorbidity: A cross-sectional  
14 558 analysis. *PLoS One* 2018;**13**:e0189091.  
15  
16 559 doi:10.1371/journal.pone.0189091  
17  
18 560  
19  
20  
21 561 17 Clerencia-Sierra M, Calderón-Larrañaga A, Martínez-Velilla N, *et al.*  
22  
23 Multimorbidity patterns in hospitalized older patients: Associations among  
24 562 chronic diseases and geriatric syndromes. *PLoS One* 2015;**10**:e0132909.  
25  
26 563 doi:10.1371/journal.pone.0132909  
27  
28 564  
29  
30  
31 565 18 Baré M, Herranz S, Jordana R, *et al.* Multimorbidity patterns in chronic older  
32  
33 patients, potentially inappropriate prescribing and adverse drug reactions:  
34 566 protocol of the multicentre prospective cohort study MoPIM. *BMJ Open*  
35  
36 567 2020;**10**:e033322. doi:10.1136/bmjopen-2019-033322  
37  
38 568  
39  
40  
41 569 19 Shah S, Vanclay F, Cooper B. Improving the sensitivity of the Barthel Index  
42  
43 for stroke rehabilitation. *J Clin Epidemiol* 1989;**42**:703–9.  
44 570 doi:10.1016/0895-4356(89)90065-6  
45  
46 571  
47  
48  
49 572 20 Salisbury C, Johnson L, Purdy S, *et al.* Epidemiology and impact of  
50  
51 multimorbidity in primary care: a retrospective cohort study. *Br J Gen Pract*  
52 573 2011;**61**:e12-21. doi:10.3399/bjgp11X548929  
53  
54 574  
55  
56  
57 575 21 Charlson ME, Peter P, Ales KL, *et al.* A new method of classifying  
58  
59 prognostic comorbidity in longitudinal studies: development and validation.  
60 576

- 1  
2  
3 577 *J Chron Dis* 1987;**40**:373–83. doi:10.1016/0021-9681(87)90171-8  
4  
5  
6 578 22 Amblàs-Novellas J, Martori JC, Espauella J, *et al.* Frail-VIG index: A  
7  
8 579 concise frailty evaluation tool for rapid geriatric assessment. *BMC Geriatr*  
9  
10 580 2018;**18**:29. doi:10.1186/s12877-018-0718-2  
11  
12  
13  
14 581 23 Quan H, Li B, Couris CM, *et al.* Updating and validating the charlson  
15  
16 582 comorbidity index and score for risk adjustment in hospital discharge  
17  
18 583 abstracts using data from 6 countries. *Am J Epidemiol* 2011;**173**:676–82.  
19  
20 584 doi:10.1093/aje/kwq433  
21  
22  
23  
24 585 24 Violán C, Foguet-Boreu Q, Fernández-Bertolín S, *et al.* Soft clustering  
25  
26 586 using real-world data for the identification of multimorbidity patterns in an  
27  
28 587 elderly population: cross-sectional study in a Mediterranean population.  
29  
30 588 2019;**9**:e029594. doi:10.1136/bmjopen-2019-029594  
31  
32  
33  
34 589 25 Chavent M, Kuentz-Simonet V, Labenne A, *et al.* Multivariate analysis of  
35  
36 590 mixed data: the R package PCAmixdata. arXiv preprint,  
37  
38 591 <https://arxiv.org/abs/1411.4911v4>. 2017.  
39  
40  
41  
42 592 26 Karlis D, Saporta G, Spinakis A. A simple rule for the selection of principal  
43  
44 593 components. *Commun Stat - Theory Methods* 2003;**32**:643–66.  
45  
46 594 doi:10.1081/STA-120018556  
47  
48  
49 595 27 Zhao Q. *Cluster Validity in Clustering Methods*.  
50  
51 596 2012.<http://cs.joensuu.fi/sipu/pub/qinpei-thesis.pdf>  
52  
53  
54  
55 597 28 Guisado-Clavero M, Roso-Llorach A, López-Jimenez T, *et al.*  
56  
57 598 Multimorbidity patterns in the elderly: A prospective cohort study with  
58  
59 599 cluster analysis. *BMC Geriatr* 2018;**18**:16. doi:10.1186/s12877-018-0705-

- 1  
2  
3 600 7  
4  
5  
6 601 29 Marengoni A, Roso-Llorach A, Vetrano DL, *et al.* Patterns of Multimorbidity  
7  
8 602 in a Population-Based Cohort of Older People: Sociodemographic,  
9  
10 603 Lifestyle, Clinical, and Functional Differences. *J Gerontol A Biol Sci Med*  
11  
12 604 *Sci* 2019;**75**:798–805. doi:10.1093/gerona/glz137  
13  
14  
15  
16 605 30 Violán C, Roso-Llorach A, Foguet-Boreu Q, *et al.* Multimorbidity patterns  
17  
18 606 with K-means nonhierarchical cluster analysis. *BMC Fam Pract*  
19  
20 607 2018;**19**:108. doi:10.1186/s12875-018-0790-x  
21  
22  
23  
24 608 31 Juul-Larsen HG, Christensen LD, Bandholm T, *et al.* Patterns of  
25  
26 609 multimorbidity and differences in healthcare utilization and complexity  
27  
28 610 among acutely hospitalized medical patients (≥65 years) – a latent class  
29  
30 611 approach. *Clin Epidemiol* 2020;**12**:245–59. doi:10.2147/CLEP.S226586  
31  
32  
33  
34 612 32 Zhu Y, Edwards D, Mant J, *et al.* Characteristics, service use and mortality  
35  
36 613 of clusters of multimorbid patients in England: a population-based study.  
37  
38 614 *BMC Med* 2020;**18**:78. doi:10.1186/s12916-020-01543-8  
39  
40  
41  
42 615 33 Nguyen QD, Wu C, Odden MC, *et al.* Multimorbidity patterns, frailty, and  
43  
44 616 survival in community-dwelling older adults. *Journals Gerontol - Ser A Biol*  
45  
46 617 *Sci Med Sci* 2019;**74**:1265–70. doi:10.1093/gerona/gly205  
47  
48  
49  
50 618 34 Poblador-Plou B, van den Akker M, Vos R, *et al.* Similar multimorbidity  
51  
52 619 patterns in primary care patients from two European regions: results of a  
53  
54 620 factor analysis. *PLoS One* 2014;**9**:e100375.  
55  
56 621 doi:10.1371/journal.pone.0100375  
57  
58  
59  
60 622 35 Vetrano DL, Roso-Llorach A, Fernández S, *et al.* Twelve-year clinical

1  
2  
3  
4  
5  
6  
7  
8  
9  
10  
11  
12  
13  
14  
15  
16  
17  
18  
19  
20  
21  
22  
23  
24  
25  
26  
27  
28  
29  
30  
31  
32  
33  
34  
35  
36  
37  
38  
39  
40  
41  
42  
43  
44  
45  
46  
47  
48  
49  
50  
51  
52  
53  
54  
55  
56  
57  
58  
59  
60

623 trajectories of multimorbidity in a population of older adults. *Nat Commun*  
624 2020;**11**:1–9. doi:10.1038/s41467-020-16780-x  
625 36 Ward K, Reuben D. Comprehensive geriatric assessment. In: *UpToDate*.  
626 2020. [https://www.uptodate.com/contents/comprehensive-geriatric-](https://www.uptodate.com/contents/comprehensive-geriatric-assessment)  
627 [assessment](https://www.uptodate.com/contents/comprehensive-geriatric-assessment) (accessed 2 Sep 2021).

628

For peer review only

BMJ Open

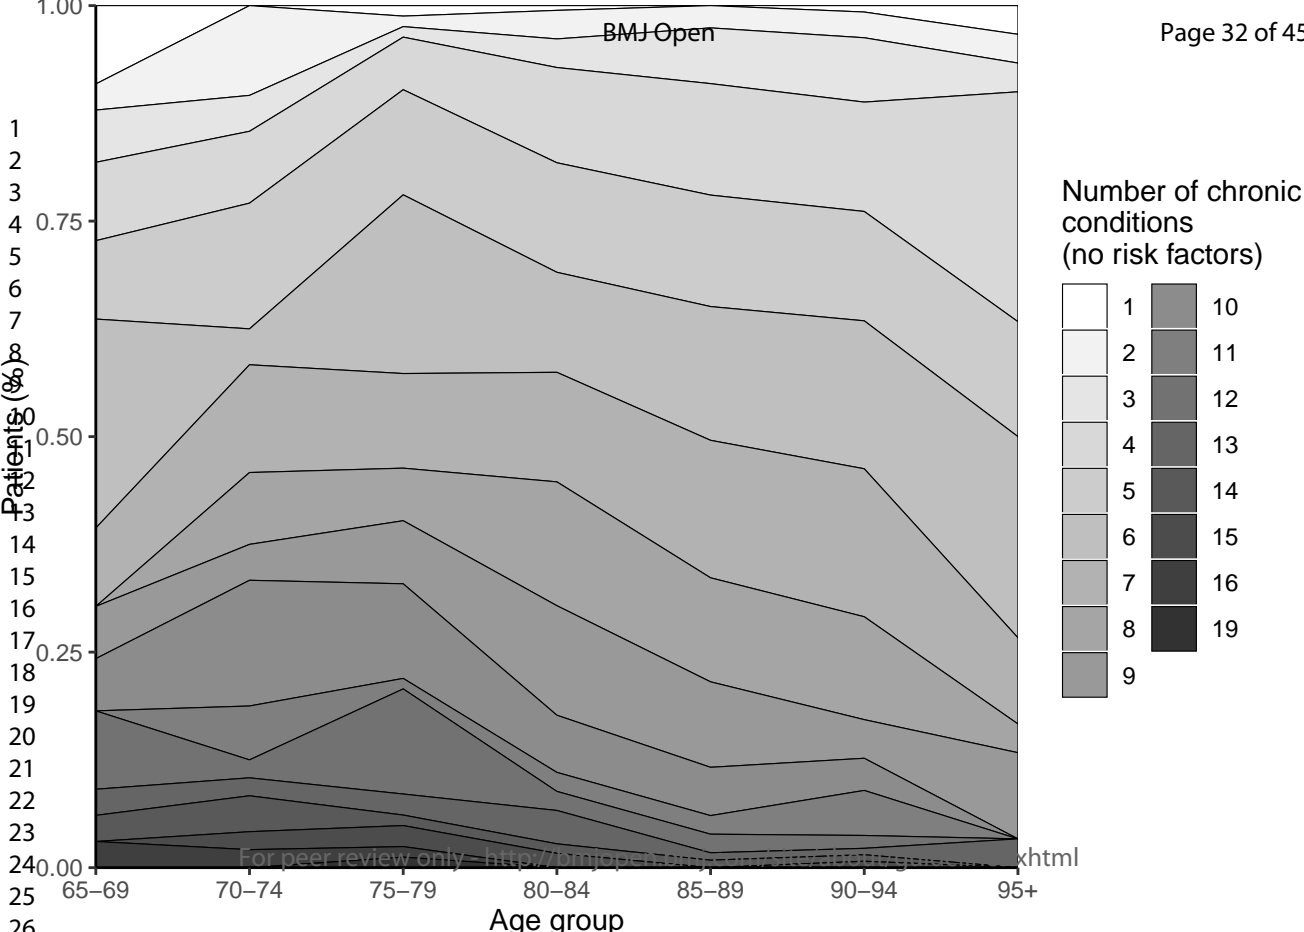

1  
2  
3  
4  
5  
6  
7  
8  
9  
10  
11  
12  
13  
14  
15  
16  
17  
18  
19  
20  
21  
22  
23  
24  
25  
26  
27  
28  
29  
30  
31  
32  
33  
34  
35  
36  
37  
38  
39  
40  
41  
42  
43  
44  
45  
46  
47

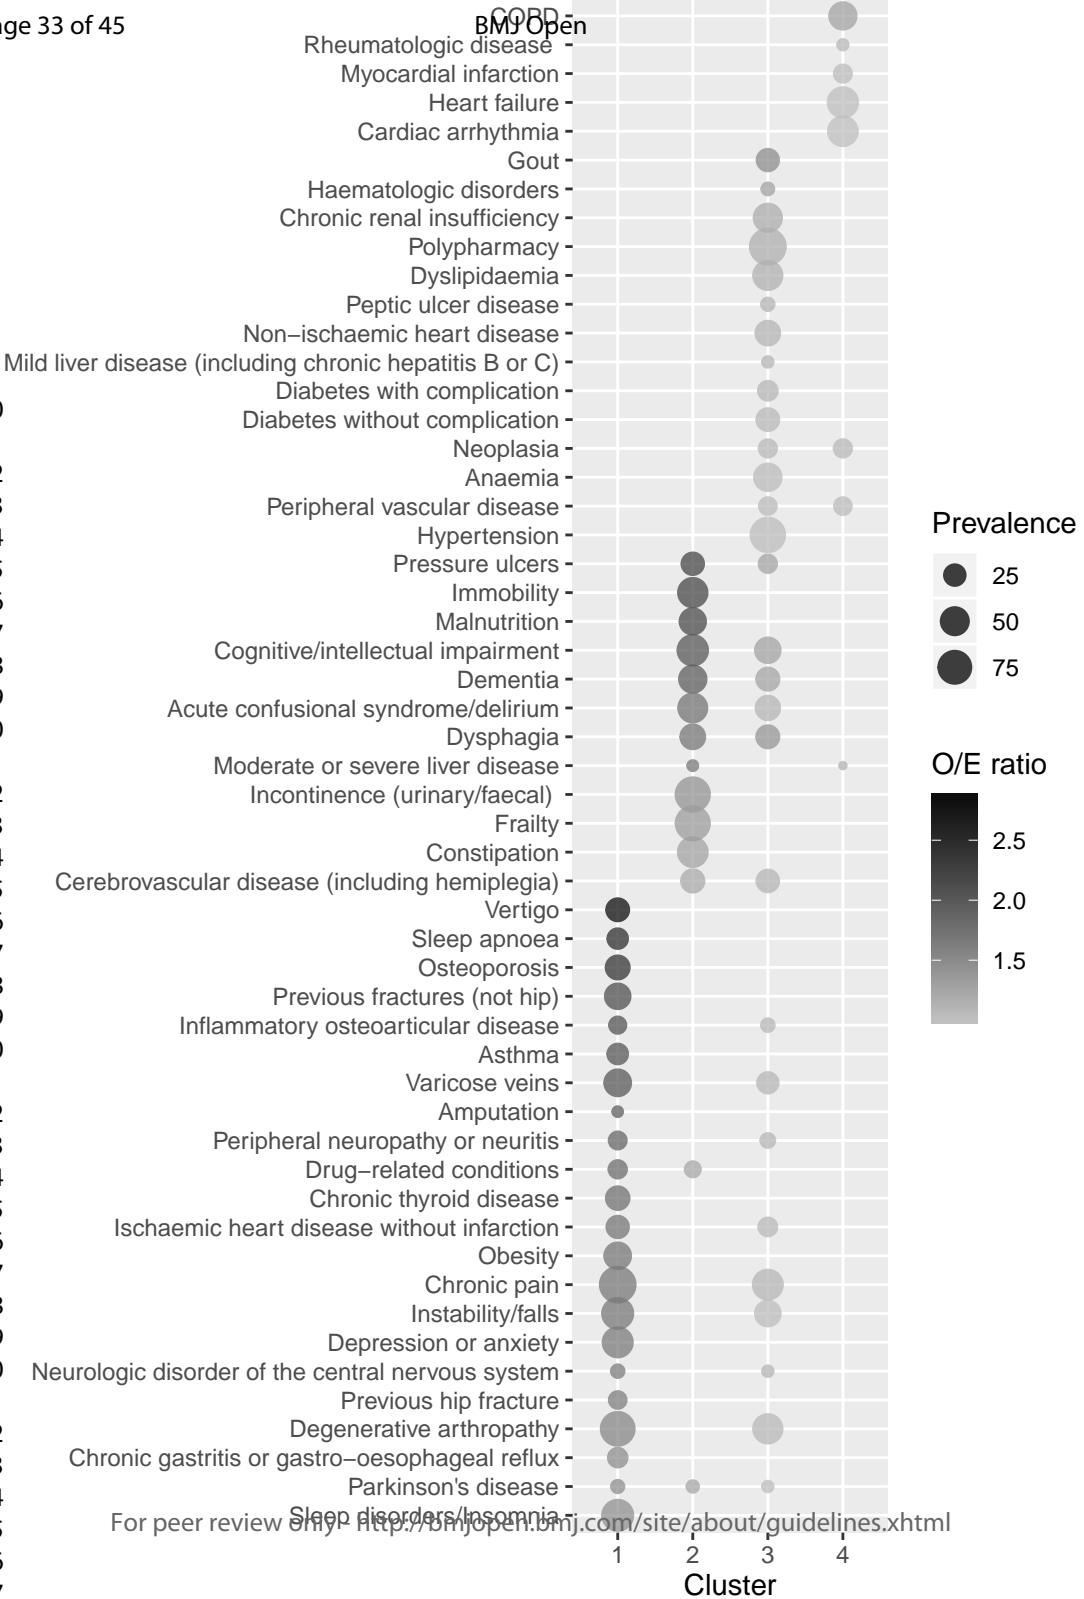

Supplemental Table 1. Chronic conditions and geriatric syndromes recorded.

| Chronic conditions                       | Geriatric syndromes and risk factors |
|------------------------------------------|--------------------------------------|
| <b><i>Charlson Index</i></b>             |                                      |
| 1. AIDS/HIV                              | Acute confusional syndrome/delirium  |
| 2. Any malignancy (excluding skin)       | Chronic pain                         |
| 3. Cerebrovascular disease               | Cognitive/Intellectual impairment    |
| 4. Chronic obstructive pulmonary disease | Constipation                         |
| 5. Congestive heart failure              | Depression or Anxiety                |
| 6. Dementia                              | Dysphagia                            |
| 7. Diabetes with complication            | Frailty                              |
| 8. Diabetes without complication         | Immobility                           |
| 9. Hemiplegia                            | Incontinence (Urinary/faecal)        |
| 10. Leukaemia                            | Instability/falls                    |
| 11. Lymphoma                             | Malnutrition                         |
| 12. Metastatic solid tumour              | Polypharmacy                         |
| 13. Mild liver disease                   | Pressure ulcers                      |
| 14. Moderate or severe liver disease     | Sensorial deficit                    |
| 15. Moderate or severe renal disease     | Sleep disorders/Insomnia             |
| 16. Myocardial infarction                |                                      |
| 17. Peptic ulcer disease                 |                                      |
| 18. Peripheral vascular disease          |                                      |
| 19. Rheumatologic disease                |                                      |
| <b><i>Other conditions</i></b>           |                                      |
| 20. Amputation                           |                                      |
| 21. Anaemia                              |                                      |
| 22. Asthma                               |                                      |
| 23. Cardiac arrhythmia                   |                                      |
| 24. Cataract                             |                                      |
| 25. Chronic hepatitis (B or C)           |                                      |
| 26. Chronic pancreatic disease           |                                      |
| 27. Degenerative arthropathy             |                                      |
| 28. Dermatitis or eczema                 |                                      |



- 
- 1 29. Diverticular disease of the colon
  - 2 30. Drug-related conditions
  - 3 31. Dyslipidaemia (risk factor)
  - 4 32. Fibromyalgia
  - 5 33. Gallstones (previous hepatic colic)
  - 6 34. Chronic gastritis or gastro-oesophageal
  - 7 reflux
  - 8 35. Glaucoma
  - 9 36. Gout
  - 10 37. Haemorrhoids
  - 11 38. Haematologic disorders (myelodysplastic
  - 12 syndrome, gammopathy, polycythaemia)
  - 13 39. Hypertension (risk factor)
  - 14 40. Inflammatory osteoarticular disease
  - 15 41. Irritable bowel syndrome
  - 16 42. Ischaemic heart disease without infarction
  - 17 43. Migraine
  - 18 44. Neurologic disorder of the central nervous
  - 19 system
  - 20 45. Non-congestive heart failure
  - 21 46. Non-ischaemic heart disease
  - 22 (miocardiopathy, valvulopathy)
  - 23 47. Non-schizophrenic mental disorders
  - 24 (excluding depression and anxiety)
  - 25 48. Obesity (risk factor)
  - 26 49. Osteoporosis (risk factor)
  - 27 50. Other neurological pathologies (essential
  - 28 tremor)
  - 29 51. Other vascular diseases (ischaemia,
  - 30 aneurism)
  - 31 52. Parkinson's disease
  - 32 53. Peripheral neuropathy or neuritis
  - 33 54. Post-traumatic stress disorder
  - 34 55. Previous fractures (not hip)
  - 35 56. Previous hip fracture
-

---

1 57. Prostatic benign hypertrophy

2 58. Schizophrenia

3 59. Sleep apnoea

4 60. Chronic thyroid disease

5 61. Tuberculosis

6 62. Urinary tract stones (nephritic colic)

7 63. Varicose veins of lower extremities

8 64. Vertigo

---

9  
10  
11  
12  
13  
14  
15  
16  
17  
18  
19  
20  
21  
22  
23  
24  
25  
26  
27  
28  
29  
30  
31  
32  
33  
34  
35  
36  
37  
38  
39  
40  
41  
42  
43  
44  
45  
46

For peer review only

**Supplemental Table 2.** Prevalence rates of chronic conditions and geriatric syndromes / risk factors in the study population by sex, separately listed in decreasing order of total prevalence rate.

|                                                                    | Female (394) |       |               | Male (346) |       |               | Total (740) |       |               |
|--------------------------------------------------------------------|--------------|-------|---------------|------------|-------|---------------|-------------|-------|---------------|
|                                                                    | N            | %     | 95% CI        | N          | %     | 95% CI        | N           | %     | 95%CI         |
| <b>CHRONIC CONDITIONS</b>                                          |              |       |               |            |       |               |             |       |               |
| <b>Risk factors</b>                                                |              |       |               |            |       |               |             |       |               |
| Hypertension                                                       | 330          | 83.76 | 79.79 - 87.07 | 273        | 78.90 | 74.30 - 82.87 | 603         | 81.49 | 78.53 - 84.12 |
| Dyslipidaemia                                                      | 189          | 47.97 | 43.08 - 52.90 | 171        | 49.42 | 44.19 - 54.67 | 360         | 48.65 | 45.06 - 52.25 |
| Obesity                                                            | 127          | 32.23 | 27.81 - 37.00 | 66         | 19.08 | 15.28 - 23.55 | 193         | 26.08 | 23.05 - 29.36 |
| Osteoporosis                                                       | 82           | 20.81 | 17.09 - 25.09 | 21         | 6.07  | 4.00 - 9.10   | 103         | 13.92 | 11.61 - 16.60 |
| Drug-related conditions                                            | 44           | 11.17 | 8.42 - 14.66  | 23         | 6.65  | 4.47 - 9.78   | 67          | 9.05  | 7.19 - 11.34  |
| <b>Chronic Diseases</b>                                            |              |       |               |            |       |               |             |       |               |
| Heart failure                                                      | 255          | 64.72 | 59.88 - 69.28 | 188        | 54.34 | 49.07 - 59.51 | 443         | 59.86 | 56.29 - 63.34 |
| Cardiac arrhythmia                                                 | 216          | 54.82 | 49.89 - 59.67 | 207        | 59.83 | 54.58 - 64.86 | 423         | 57.16 | 53.57 - 60.68 |
| Degenerative arthropathy                                           | 228          | 57.87 | 52.94 - 62.64 | 157        | 45.38 | 40.21 - 50.64 | 385         | 52.03 | 48.43 - 55.61 |
| Anaemia                                                            | 182          | 46.19 | 41.33 - 51.13 | 152        | 43.93 | 38.80 - 49.20 | 334         | 45.14 | 41.58 - 48.74 |
| Moderate or severe renal disease                                   | 164          | 41.62 | 36.86 - 46.55 | 156        | 45.09 | 39.93 - 50.35 | 320         | 43.24 | 39.72 - 46.84 |
| Chronic obstructive pulmonary disease (COPD)                       | 90           | 22.84 | 18.97 - 27.24 | 183        | 52.89 | 47.63 - 58.09 | 273         | 36.89 | 33.49 - 40.43 |
| Non-ischaemic heart disease                                        | 125          | 31.73 | 27.33 - 36.48 | 113        | 32.66 | 27.93 - 37.77 | 238         | 32.16 | 28.90 - 35.61 |
| Diabetes without complication                                      | 101          | 25.63 | 21.57 - 30.17 | 100        | 28.90 | 24.38 - 33.89 | 201         | 27.16 | 24.08 - 30.48 |
| Cerebrovascular disease (including hemiplegia)                     | 95           | 24.11 | 20.15 - 28.57 | 93         | 26.88 | 22.48 - 31.78 | 188         | 25.41 | 22.40 - 28.66 |
| Dementia                                                           | 103          | 26.14 | 22.05 - 30.70 | 76         | 21.97 | 17.92 - 26.62 | 179         | 24.19 | 21.24 - 27.40 |
| Varicose veins of lower extremities                                | 98           | 24.87 | 20.86 - 29.37 | 66         | 19.08 | 15.28 - 23.55 | 164         | 22.16 | 19.32 - 25.29 |
| Previous fracture (not hip)                                        | 87           | 22.08 | 18.27 - 26.44 | 52         | 15.03 | 11.65 - 19.18 | 139         | 18.78 | 16.13 - 21.76 |
| Gout                                                               | 57           | 14.47 | 11.34 - 18.28 | 80         | 23.12 | 18.99 - 27.84 | 137         | 18.51 | 15.88 - 21.47 |
| Chronic thyroid disease                                            | 93           | 23.60 | 19.68 - 28.04 | 42         | 12.14 | 9.11 - 16.00  | 135         | 18.24 | 15.63 - 21.19 |
| Diabetes with complication                                         | 70           | 17.77 | 14.31 - 21.85 | 63         | 18.21 | 14.50 - 22.62 | 133         | 17.97 | 15.37 - 20.90 |
| Ischaemic heart disease without infarction                         | 58           | 14.72 | 11.56 - 18.56 | 62         | 17.92 | 14.24 - 22.31 | 120         | 16.22 | 13.74 - 19.05 |
| Myocardial infarction                                              | 47           | 11.93 | 9.09 - 15.50  | 64         | 18.50 | 14.76 - 22.93 | 111         | 15.00 | 12.61 - 17.75 |
| Neoplasia (including leukaemia, lymphoma, metastatic solid tumour) | 29           | 7.36  | 5.17 - 10.37  | 82         | 23.70 | 19.52 - 28.45 | 111         | 15.00 | 12.61 - 17.75 |
| Peripheral vascular disease                                        | 31           | 7.87  | 5.60 - 10.95  | 74         | 21.39 | 17.39 - 26.01 | 105         | 14.19 | 11.86 - 16.89 |
| Chronic gastritis or gastro-oesophageal reflux                     | 55           | 13.96 | 10.88 - 17.73 | 42         | 12.14 | 9.11 - 16.00  | 97          | 13.11 | 10.87 - 15.73 |

|                                                         | Female (394) |       |               | Male (346) |       |               | Total (740) |       |               |
|---------------------------------------------------------|--------------|-------|---------------|------------|-------|---------------|-------------|-------|---------------|
|                                                         | N            | %     | 95% CI        | N          | %     | 95% CI        | N           | %     | 95%CI         |
| Asthma                                                  | 74           | 18.78 | 15.23 - 22.93 | 8          | 2.31  | 1.18 - 4.50   | 82          | 11.08 | 9.02 - 13.55  |
| Gallstones                                              | 39           | 9.90  | 7.33 - 13.25  | 40         | 11.56 | 8.61 - 15.36  | 79          | 10.68 | 8.65 - 13.11  |
| Vertigo                                                 | 54           | 13.71 | 10.66 - 17.45 | 23         | 6.65  | 4.47 - 9.78   | 77          | 10.41 | 8.41 - 12.81  |
| Previous hip fracture                                   | 52           | 13.20 | 10.21 - 16.90 | 15         | 4.34  | 2.64 - 7.03   | 67          | 9.05  | 7.19 - 11.34  |
| Sleep apnoea                                            | 34           | 8.63  | 6.24 - 11.82  | 32         | 9.25  | 6.63 - 12.76  | 66          | 8.92  | 7.07 - 11.19  |
| Peripheral neuropathy or neuritis                       | 27           | 6.85  | 4.75 - 9.79   | 34         | 9.83  | 7.12 - 13.42  | 61          | 8.24  | 6.47 - 10.45  |
| Inflammatory osteoarticular disease                     | 26           | 6.60  | 4.54 - 9.49   | 23         | 6.65  | 4.47 - 9.78   | 49          | 6.62  | 5.04 - 8.65   |
| Peptic ulcer disease                                    | 11           | 2.79  | 1.57 - 4.93   | 35         | 10.12 | 7.36 - 13.74  | 46          | 6.22  | 4.69 - 8.19   |
| Haematologic disorders                                  | 14           | 3.55  | 2.13 - 5.88   | 22         | 6.36  | 4.24 - 9.44   | 36          | 4.86  | 3.53 - 6.66   |
| Parkinson disease                                       | 15           | 3.81  | 2.32 - 6.19   | 19         | 5.49  | 3.54 - 8.42   | 34          | 4.59  | 3.31 - 6.35   |
| Rheumatologic disease                                   | 22           | 5.58  | 3.72 - 8.31   | 10         | 2.89  | 1.58 - 5.24   | 32          | 4.32  | 3.08 - 6.04   |
| Mild liver disease (including chronic hepatitis B or C) | 12           | 3.05  | 1.75 - 5.25   | 20         | 5.78  | 3.77 - 8.76   | 32          | 4.32  | 3.08 - 6.04   |
| Neurologic disorder of the CNS                          | 11           | 2.79  | 1.57 - 4.93   | 21         | 6.07  | 4.00 - 9.10   | 32          | 4.32  | 3.08 - 6.04   |
| Moderate or severe liver disease                        | 9            | 2.28  | 1.21 - 4.28   | 10         | 2.89  | 1.58 - 5.24   | 19          | 2.57  | 1.65 - 3.98   |
| Amputation                                              | 4            | 1.02  | 0.40 - 2.58   | 12         | 3.47  | 1.99 - 5.96   | 16          | 2.16  | 1.34 - 3.48   |
| Urinary tract stones                                    | 9            | 2.28  | 1.21 - 4.28   | 5          | 1.45  | 0.62 - 3.34   | 14          | 1.89  | 1.13 - 3.15   |
| Non-schizophrenic mental disorders                      | 11           | 2.79  | 1.57 - 4.93   | 1          | 0.29  | 0.01 - 1.62   | 12          | 1.62  | 0.93 - 2.81   |
| Irritable bowel syndrome                                | 7            | 1.78  | 0.86 - 3.62   | 4          | 1.16  | 0.45 - 2.93   | 11          | 1.49  | 0.83 - 2.64   |
| Chronic pancreatic disease                              | 4            | 1.02  | 0.40 - 2.58   | 6          | 1.73  | 0.80 - 3.73   | 10          | 1.35  | 0.74 - 2.47   |
| Tuberculosis                                            | 5            | 1.27  | 0.54 - 2.94   | 4          | 1.16  | 0.45 - 2.93   | 9           | 1.22  | 0.64 - 2.30   |
| Other neurological pathologies                          | 3            | 0.76  | 0.26 - 2.21   | 6          | 1.73  | 0.80 - 3.73   | 9           | 1.22  | 0.64 - 2.30   |
| Fibromyalgia                                            | 6            | 1.52  | 0.70 - 3.28   | 2          | 0.58  | 0.16 - 2.08   | 8           | 1.08  | 0.55 - 2.12   |
| Migraine                                                | 4            | 1.02  | 0.40 - 2.58   | 0          | 0.00  | 0.00 - 1.10   | 4           | 0.54  | 0.21 - 1.38   |
| Schizophrenia                                           | 1            | 0.25  | 0.01 - 1.42   | 2          | 0.58  | 0.16 - 2.08   | 3           | 0.41  | 0.14 - 1.19   |
| Post-traumatic stress disorder                          | 1            | 0.25  | 0.01 - 1.42   | 2          | 0.58  | 0.16 - 2.08   | 3           | 0.41  | 0.14 - 1.19   |
| AIDS/HIV                                                | 0            | 0.00  | 0.00 - 0.00   | 0          | 0.00  | 0.00 - 0.00   | 0           | 0.00  | 0.00 - 0.00   |
| <b>GERIATRIC SYNDROMES AND RISK FACTORS</b>             |              |       |               |            |       |               |             |       |               |
| Polypharmacy                                            | 310          | 78.68 | 74.37 - 82.44 | 281        | 81.21 | 76.76 - 84.98 | 591         | 79.86 | 76.82 - 82.60 |
| Frailty                                                 | 269          | 68.27 | 63.52 - 72.67 | 188        | 54.34 | 49.07 - 59.51 | 457         | 61.76 | 58.20 - 65.19 |
| Incontinence (Urinary/faecal)                           | 273          | 69.29 | 64.57 - 73.64 | 157        | 45.38 | 40.21 - 50.64 | 430         | 58.11 | 54.52 - 61.61 |
| Chronic pain                                            | 231          | 58.63 | 53.71 - 63.39 | 171        | 49.42 | 44.19 - 54.67 | 402         | 54.32 | 50.72 - 57.88 |
| Constipation                                            | 201          | 51.02 | 46.09 - 55.92 | 139        | 40.17 | 35.14 - 45.42 | 340         | 45.95 | 42.39 - 49.55 |

1  
2  
3  
4  
5  
6  
7  
8  
9  
10  
11  
12  
13  
14  
15  
16  
17  
18  
19  
20  
21  
22  
23  
24  
25  
26  
27  
28  
29  
30  
31  
32  
33  
34  
35  
36  
37  
38  
39  
40  
41  
42  
43  
44  
45  
46

|                                       | Female (394) |       |               | Male (346) |       |               | Total (740) |       |               |
|---------------------------------------|--------------|-------|---------------|------------|-------|---------------|-------------|-------|---------------|
|                                       | N            | %     | 95% CI        | N          | %     | 95% CI        | N           | %     | 95%CI         |
| Sleep disorders/Insomnia              | 189          | 47.97 | 43.08 - 52.90 | 144        | 41.62 | 36.54 - 46.88 | 333         | 45.00 | 41.45 - 48.60 |
| Sensorial deficit                     | 169          | 42.89 | 38.10 - 47.83 | 145        | 41.91 | 36.83 - 47.17 | 314         | 42.43 | 38.92 - 46.02 |
| Instability/falls                     | 158          | 40.10 | 35.38 - 45.01 | 128        | 36.99 | 32.08 - 42.20 | 286         | 38.65 | 35.21 - 42.21 |
| Depression or anxiety                 | 193          | 48.98 | 44.08 - 53.91 | 75         | 21.68 | 17.66 - 26.32 | 268         | 36.22 | 32.83 - 39.74 |
| Acute confusional syndrome / delirium | 118          | 29.95 | 25.64 - 34.65 | 117        | 33.82 | 29.03 - 38.95 | 235         | 31.76 | 28.50 - 35.20 |
| Cognitive/Intellectual impairment     | 133          | 33.76 | 29.26 - 38.56 | 96         | 27.75 | 23.29 - 32.69 | 229         | 30.95 | 27.72 - 34.37 |
| Immobility                            | 114          | 28.93 | 24.68 - 33.60 | 78         | 22.54 | 18.46 - 27.23 | 192         | 25.95 | 22.92 - 29.22 |
| Dysphagia                             | 78           | 19.80 | 16.16 - 24.01 | 81         | 23.41 | 19.26 - 28.15 | 159         | 21.49 | 18.68 - 24.59 |
| Malnutrition                          | 76           | 19.29 | 15.70 - 23.47 | 71         | 20.52 | 16.60 - 25.09 | 147         | 19.86 | 17.15 - 22.89 |
| Pressure ulcers                       | 57           | 14.47 | 11.34 - 18.28 | 38         | 10.98 | 8.11 - 14.72  | 95          | 12.84 | 10.62 - 15.44 |

peer review only

**Supplemental Table 3.** Weight as an indicator of importance on clinical management assigned to each chronic condition. Weight values range from 0 to 8, where 0 means no clinical management was required and 1 to 8 indicate clinical management from main cause of hospitalization (1) to chronic condition requiring the least medical attention (8). Chronic conditions are displayed in alphabetical order.

| Chronic conditions                             | Weight 0 |       | Weight 1 |       | Weight 2 |       | Weight 3 |      | Weight 4 |      | Weight 5 |      | Weight 6 |      | Weight 7 |      | Weight 8 |   |
|------------------------------------------------|----------|-------|----------|-------|----------|-------|----------|------|----------|------|----------|------|----------|------|----------|------|----------|---|
|                                                | N        | %     | N        | %     | N        | %     | N        | %    | N        | %    | N        | %    | N        | %    | N        | %    | N        | % |
| AIDS/HIV                                       | 740      | 100   | 0        | 0     | 0        | 0     | 0        | 0    | 0        | 0    | 0        | 0    | 0        | 0    | 0        | 0    | 0        | 0 |
| Amputation                                     | 739      | 99.86 | 0        | 0     | 1        | 0.14  | 0        | 0    | 0        | 0    | 0        | 0    | 0        | 0    | 0        | 0    | 0        | 0 |
| Anaemia                                        | 596      | 80.54 | 28       | 3.78  | 46       | 6.22  | 40       | 5.41 | 19       | 2.57 | 8        | 1.08 | 3        | 0.41 | 0        | 0    | 0        | 0 |
| Asthma                                         | 704      | 95.14 | 30       | 4.05  | 3        | 0.41  | 2        | 0.27 | 1        | 0.14 | 0        | 0    | 0        | 0    | 0        | 0    | 0        | 0 |
| Rheumatologic disease                          | 729      | 98.51 | 5        | 0.68  | 3        | 0.41  | 3        | 0.41 | 0        | 0    | 0        | 0    | 0        | 0    | 0        | 0    | 0        | 0 |
| Cardiac arrhythmia                             | 595      | 80.41 | 35       | 4.73  | 69       | 9.32  | 28       | 3.78 | 10       | 1.35 | 3        | 0.41 | 0        | 0    | 0        | 0    | 0        | 0 |
| Cerebrovascular disease (including hemiplegia) | 703      | 95    | 28       | 3.78  | 3        | 0.41  | 3        | 0.41 | 2        | 0.27 | 1        | 0.14 | 0        | 0    | 0        | 0    | 0        | 0 |
| Chronic gastritis or gastro-oesophageal reflux | 733      | 99.05 | 4        | 0.54  | 1        | 0.14  | 1        | 0.14 | 1        | 0.14 | 0        | 0    | 0        | 0    | 0        | 0    | 0        | 0 |
| Chronic pancreatic disease                     | 739      | 99.86 | 0        | 0     | 1        | 0.14  | 0        | 0    | 0        | 0    | 0        | 0    | 0        | 0    | 0        | 0    | 0        | 0 |
| Chronic obstructive pulmonary disease (COPD)   | 554      | 74.86 | 153      | 20.68 | 19       | 2.57  | 8        | 1.08 | 5        | 0.68 | 0        | 0    | 1        | 0.14 | 0        | 0    | 0        | 0 |
| Chronic thyroid disease                        | 722      | 97.57 | 2        | 0.27  | 1        | 0.14  | 4        | 0.54 | 7        | 0.95 | 3        | 0.41 | 1        | 0.14 | 0        | 0    | 0        | 0 |
| Degenerative arthropathy                       | 718      | 97.03 | 3        | 0.41  | 7        | 0.95  | 4        | 0.54 | 4        | 0.54 | 3        | 0.41 | 1        | 0.14 | 0        | 0    | 0        | 0 |
| Dementia                                       | 687      | 92.84 | 32       | 4.32  | 14       | 1.89  | 4        | 0.54 | 3        | 0.41 | 0        | 0    | 0        | 0    | 0        | 0    | 0        | 0 |
| Diabetes with complication                     | 710      | 95.95 | 9        | 1.22  | 7        | 0.95  | 5        | 0.68 | 4        | 0.54 | 2        | 0.27 | 3        | 0.41 | 0        | 0    | 0        | 0 |
| Diabetes without complication                  | 698      | 94.32 | 11       | 1.49  | 5        | 0.68  | 13       | 1.76 | 8        | 1.08 | 2        | 0.27 | 1        | 0.14 | 2        | 0.27 | 0        | 0 |
| Drug-related conditions                        | 722      | 97.57 | 5        | 0.68  | 3        | 0.41  | 3        | 0.41 | 4        | 0.54 | 1        | 0.14 | 1        | 0.14 | 1        | 0.14 | 0        | 0 |
| Dyslipidaemia                                  | 735      | 99.32 | 0        | 0     | 0        | 0     | 0        | 0    | 4        | 0.54 | 1        | 0.14 | 0        | 0    | 0        | 0    | 0        | 0 |
| Fibromyalgia                                   | 739      | 99.86 | 0        | 0     | 1        | 0.14  | 0        | 0    | 0        | 0    | 0        | 0    | 0        | 0    | 0        | 0    | 0        | 0 |
| Gallstones                                     | 730      | 98.65 | 6        | 0.81  | 3        | 0.41  | 1        | 0.14 | 0        | 0    | 0        | 0    | 0        | 0    | 0        | 0    | 0        | 0 |
| Gout                                           | 737      | 99.59 | 0        | 0     | 0        | 0     | 2        | 0.27 | 0        | 0    | 1        | 0.14 | 0        | 0    | 0        | 0    | 0        | 0 |
| Haematologic disorders                         | 730      | 98.65 | 2        | 0.27  | 5        | 0.68  | 2        | 0.27 | 1        | 0.14 | 0        | 0    | 0        | 0    | 0        | 0    | 0        | 0 |
| Heart failure                                  | 410      | 55.41 | 227      | 30.68 | 85       | 11.49 | 13       | 1.76 | 4        | 0.54 | 0        | 0    | 1        | 0.14 | 0        | 0    | 0        | 0 |
| Hypertension                                   | 698      | 94.32 | 10       | 1.35  | 14       | 1.89  | 12       | 1.62 | 4        | 0.54 | 2        | 0.27 | 0        | 0    | 0        | 0    | 0        | 0 |
| Inflammatory osteoarticular disease            | 727      | 98.24 | 8        | 1.08  | 1        | 0.14  | 1        | 0.14 | 1        | 0.14 | 1        | 0.14 | 1        | 0.14 | 0        | 0    | 0        | 0 |
| Irritable bowel syndrome                       | 740      | 100   | 0        | 0     | 0        | 0     | 0        | 0    | 0        | 0    | 0        | 0    | 0        | 0    | 0        | 0    | 0        | 0 |
| Ischaemic heart disease without infarction     | 714      | 96.49 | 10       | 1.35  | 14       | 1.89  | 1        | 0.14 | 0        | 0    | 1        | 0.14 | 0        | 0    | 0        | 0    | 0        | 0 |

|    |                                                                    |     |       |    |      |    |       |    |      |    |      |   |      |   |      |   |      |
|----|--------------------------------------------------------------------|-----|-------|----|------|----|-------|----|------|----|------|---|------|---|------|---|------|
| 1  | Migraine                                                           | 740 | 100   | 0  | 0    | 0  | 0     | 0  | 0    | 0  | 0    | 0 | 0    | 0 | 0    | 0 | 0    |
| 2  | Mild liver disease (including chronic hepatitis B or C)            | 733 | 99.05 | 5  | 0.68 | 0  | 0     | 1  | 0.14 | 0  | 0    | 0 | 0    | 0 | 0    | 1 | 0.14 |
| 3  | Moderate or severe liver disease                                   | 724 | 97.84 | 12 | 1.62 | 2  | 0.27  | 1  | 0.14 | 0  | 0    | 1 | 0.14 | 0 | 0    | 0 | 0    |
| 4  | Moderate or severe renal disease                                   | 552 | 74.59 | 39 | 5.27 | 77 | 10.41 | 44 | 5.95 | 23 | 3.11 | 4 | 0.54 | 1 | 0.14 | 0 | 0    |
| 5  | Myocardial infarction                                              | 716 | 96.76 | 20 | 2.7  | 3  | 0.41  | 1  | 0.14 | 0  | 0    | 0 | 0    | 0 | 0    | 0 | 0    |
| 6  | Neoplasia (including leukaemia, lymphoma, metastatic solid tumour) | 724 | 97.84 | 5  | 0.68 | 7  | 0.95  | 1  | 0.14 | 1  | 0.14 | 2 | 0.27 | 0 | 0    | 0 | 0    |
| 7  | Neurologic disorder of the CNS                                     | 736 | 99.46 | 2  | 0.27 | 2  | 0.27  | 0  | 0    | 0  | 0    | 0 | 0    | 0 | 0    | 0 | 0    |
| 8  | Non-ischaemic heart disease                                        | 695 | 93.92 | 15 | 2.03 | 16 | 2.16  | 12 | 1.62 | 0  | 0    | 2 | 0.27 | 0 | 0    | 0 | 0    |
| 9  | Non-schizophrenic mental disorders                                 | 732 | 98.92 | 2  | 0.27 | 2  | 0.27  | 1  | 0.14 | 2  | 0.27 | 1 | 0.14 | 0 | 0    | 0 | 0    |
| 10 | Obesity                                                            | 737 | 99.59 | 0  | 0    | 1  | 0.14  | 2  | 0.27 | 0  | 0    | 0 | 0    | 0 | 0    | 0 | 0    |
| 11 | Osteoporosis                                                       | 730 | 98.65 | 2  | 0.27 | 3  | 0.41  | 2  | 0.27 | 2  | 0.27 | 0 | 0    | 1 | 0.14 | 0 | 0    |
| 12 | Other neurological pathologies                                     | 740 | 100   | 0  | 0    | 0  | 0     | 0  | 0    | 0  | 0    | 0 | 0    | 0 | 0    | 0 | 0    |
| 13 | Parkinson's disease                                                | 737 | 99.59 | 3  | 0.41 | 0  | 0     | 0  | 0    | 0  | 0    | 0 | 0    | 0 | 0    | 0 | 0    |
| 14 | Peptic ulcer disease                                               | 737 | 99.59 | 2  | 0.27 | 1  | 0.14  | 0  | 0    | 0  | 0    | 0 | 0    | 0 | 0    | 0 | 0    |
| 15 | Peripheral neuropathy or neuritis                                  | 737 | 99.59 | 1  | 0.14 | 1  | 0.14  | 1  | 0.14 | 0  | 0    | 0 | 0    | 0 | 0    | 0 | 0    |
| 16 | Peripheral vascular disease                                        | 728 | 98.38 | 9  | 1.22 | 1  | 0.14  | 1  | 0.14 | 0  | 0    | 0 | 0    | 1 | 0.14 | 0 | 0    |
| 17 | Post-traumatic stress disorder                                     | 739 | 99.86 | 1  | 0.14 | 0  | 0     | 0  | 0    | 0  | 0    | 0 | 0    | 0 | 0    | 0 | 0    |
| 18 | Previous fracture (not hip)                                        | 730 | 98.65 | 5  | 0.68 | 2  | 0.27  | 2  | 0.27 | 1  | 0.14 | 0 | 0    | 0 | 0    | 0 | 0    |
| 19 | Previous hip fracture                                              | 740 | 100   | 0  | 0    | 0  | 0     | 0  | 0    | 0  | 0    | 0 | 0    | 0 | 0    | 0 | 0    |
| 20 | Schizophrenia                                                      | 740 | 100   | 0  | 0    | 0  | 0     | 0  | 0    | 0  | 0    | 0 | 0    | 0 | 0    | 0 | 0    |
| 21 | Sleep apnoea                                                       | 716 | 96.76 | 5  | 0.68 | 9  | 1.22  | 5  | 0.68 | 1  | 0.14 | 4 | 0.54 | 0 | 0    | 0 | 0    |
| 22 | Tuberculosis                                                       | 740 | 100   | 0  | 0    | 0  | 0     | 0  | 0    | 0  | 0    | 0 | 0    | 0 | 0    | 0 | 0    |
| 23 | Urinary tract stones                                               | 740 | 100   | 0  | 0    | 0  | 0     | 0  | 0    | 0  | 0    | 0 | 0    | 0 | 0    | 0 | 0    |
| 24 | Varicose veins of lower extremities                                | 725 | 97.97 | 1  | 0.14 | 6  | 0.81  | 2  | 0.27 | 4  | 0.54 | 2 | 0.27 | 0 | 0    | 0 | 0    |
| 25 | Vertigo                                                            | 740 | 100   | 0  | 0    | 0  | 0     | 0  | 0    | 0  | 0    | 0 | 0    | 0 | 0    | 0 | 0    |

For peer review only

32  
33  
34  
35  
36  
37  
38  
39  
40  
41  
42  
43  
44  
45  
46

**Supplemental table 4.** Prevalence, Observed/Expected (O/E) ratios and exclusivity of chronic conditions and geriatric syndromes / risk factors per multimorbidity cluster. Conditions with prevalence >2% were included. O/E ratios were calculated by dividing the prevalence of a disease within the cluster by its prevalence in the overall population. Exclusivity was calculated by dividing the number of patients with the disease in the cluster by the total number of participants with the disease. Conditions are ordered by decreasing O/E ratio of cluster 1.

|                                                | Cluster 1      |           |                 | Cluster 2      |           |                 | Cluster 3      |           |                 | Cluster 4      |           |                 |
|------------------------------------------------|----------------|-----------|-----------------|----------------|-----------|-----------------|----------------|-----------|-----------------|----------------|-----------|-----------------|
|                                                | Prevalence (%) | O/E ratio | Exclusivity (%) | Prevalence (%) | O/E ratio | Exclusivity (%) | Prevalence (%) | O/E ratio | Exclusivity (%) | Prevalence (%) | O/E ratio | Exclusivity (%) |
| Vertigo                                        | 29.58          | 2.84      | 50.67           | 9.52           | 0.91      | 18.92           | 6.85           | 0.66      | 15.90           | 4.05           | 0.39      | 14.52           |
| Sleep apnoea                                   | 22.11          | 2.48      | 44.19           | 5.82           | 0.65      | 13.50           | 8.12           | 0.91      | 21.99           | 4.85           | 0.54      | 20.33           |
| Osteoporosis                                   | 33.39          | 2.40      | 42.76           | 9.95           | 0.71      | 14.79           | 9.44           | 0.68      | 16.38           | 9.72           | 0.70      | 26.07           |
| Previous fracture (not hip)                    | 39.67          | 2.11      | 37.65           | 17.87          | 0.95      | 19.68           | 15.16          | 0.81      | 19.49           | 11.66          | 0.62      | 23.19           |
| Inflammatory osteoarticular disease            | 13.61          | 2.06      | 36.65           | 2.78           | 0.42      | 8.69            | 7.21           | 1.09      | 26.31           | 5.03           | 0.76      | 28.36           |
| Asthma                                         | 22.50          | 2.03      | 36.19           | 9.37           | 0.85      | 17.49           | 7.77           | 0.70      | 16.94           | 8.72           | 0.79      | 29.37           |
| Varicose veins of lower extremities            | 44.58          | 2.01      | 35.86           | 15.2           | 0.69      | 14.19           | 24.37          | 1.10      | 26.56           | 13.89          | 0.63      | 23.40           |
| Amputation                                     | 4.190          | 1.94      | 34.56           | 1.72           | 0.8       | 16.45           | 2.00           | 0.92      | 22.30           | 1.55           | 0.71      | 26.69           |
| Peripheral neuropathy or neuritis              | 15.37          | 1.86      | 33.23           | 6.00           | 0.73      | 15.06           | 9.03           | 1.10      | 26.46           | 5.58           | 0.68      | 25.26           |
| Drug-related conditions                        | 16.31          | 1.80      | 32.12           | 11.23          | 1.24      | 25.66           | 7.41           | 0.82      | 19.76           | 5.45           | 0.60      | 22.46           |
| Chronic thyroid disease                        | 32.14          | 1.76      | 31.40           | 13.73          | 0.75      | 15.57           | 16.06          | 0.88      | 21.26           | 15.52          | 0.85      | 31.77           |
| Ischaemic heart disease without infarction     | 27.75          | 1.71      | 30.5            | 10.85          | 0.67      | 13.84           | 17.59          | 1.08      | 26.20           | 12.79          | 0.79      | 29.46           |
| Obesity                                        | 44.29          | 1.70      | 30.27           | 19.14          | 0.73      | 15.18           | 25.15          | 0.96      | 23.28           | 21.84          | 0.84      | 31.27           |
| Chronic pain                                   | 91.68          | 1.69      | 30.09           | 50.3           | 0.93      | 19.15           | 59.72          | 1.10      | 26.55           | 35.23          | 0.65      | 24.22           |
| Instability/falls                              | 65.05          | 1.68      | 30.00           | 36.74          | 0.95      | 19.66           | 40.06          | 1.04      | 25.03           | 26.19          | 0.68      | 25.30           |
| Depression or Anxiety                          | 60.05          | 1.66      | 29.56           | 35.49          | 0.98      | 20.27           | 30.57          | 0.84      | 20.38           | 28.89          | 0.80      | 29.79           |
| Neurologic disorder of the CNS                 | 7.10           | 1.64      | 29.28           | 4.92           | 1.14      | 23.54           | 4.78           | 1.11      | 26.72           | 2.37           | 0.55      | 20.47           |
| Previous hip fracture                          | 14.76          | 1.63      | 29.06           | 9.23           | 1.02      | 21.08           | 6.20           | 0.69      | 16.55           | 8.08           | 0.89      | 33.31           |
| Degenerative arthropathy                       | 80.19          | 1.54      | 27.48           | 48.11          | 0.92      | 19.13           | 56.15          | 1.08      | 26.06           | 38.08          | 0.73      | 27.34           |
| Chronic gastritis or gastro-oesophageal reflux | 19.39          | 1.48      | 26.37           | 9.09           | 0.69      | 14.35           | 12.6           | 0.96      | 23.22           | 12.66          | 0.97      | 36.07           |
| Parkinson's disease                            | 6.72           | 1.46      | 26.07           | 5.73           | 1.25      | 25.78           | 4.77           | 1.04      | 25.08           | 2.84           | 0.62      | 23.06           |
| Sleep disorders/Insomnia                       | 64.93          | 1.44      | 25.72           | 51.57          | 1.15      | 23.70           | 42.58          | 0.95      | 22.85           | 33.41          | 0.74      | 27.73           |
| Moderate or severe renal disease               | 59.30          | 1.37      | 24.44           | 29.11          | 0.67      | 13.92           | 51.19          | 1.18      | 28.59           | 38.27          | 0.88      | 33.05           |
| Non-ischaemic heart disease                    | 43.07          | 1.34      | 23.87           | 23.15          | 0.72      | 14.89           | 36.01          | 1.12      | 27.04           | 29.46          | 0.92      | 34.20           |



|    |                                                                    |       |      |       |       |      |       |       |      |       |       |      |       |
|----|--------------------------------------------------------------------|-------|------|-------|-------|------|-------|-------|------|-------|-------|------|-------|
| 1  | Myocardial infarction                                              | 19.88 | 1.33 | 23.63 | 10.00 | 0.67 | 13.79 | 14.68 | 0.98 | 23.64 | 15.64 | 1.04 | 38.94 |
| 2  | Dyslipidaemia                                                      | 64.28 | 1.32 | 23.55 | 35.21 | 0.72 | 14.97 | 55.63 | 1.14 | 27.62 | 44.11 | 0.91 | 33.86 |
| 3  | Frailty                                                            | 81.11 | 1.31 | 23.41 | 82.71 | 1.34 | 27.70 | 55.05 | 0.89 | 21.53 | 45.26 | 0.73 | 27.36 |
| 4  | Anaemia                                                            | 59.26 | 1.31 | 23.40 | 42.23 | 0.94 | 19.35 | 47.71 | 1.06 | 25.53 | 38.34 | 0.85 | 31.72 |
| 5  | Gallstones                                                         | 13.87 | 1.30 | 23.16 | 10.6  | 0.99 | 20.54 | 9.66  | 0.90 | 21.85 | 9.85  | 0.92 | 34.46 |
| 6  | Haematologic disorders                                             | 6.24  | 1.28 | 22.88 | 2.80  | 0.58 | 11.91 | 6.24  | 1.28 | 30.99 | 4.46  | 0.92 | 34.22 |
| 7  | Constipation                                                       | 57.53 | 1.25 | 22.32 | 58.53 | 1.27 | 26.35 | 36.80 | 0.80 | 19.34 | 39.36 | 0.86 | 31.99 |
| 8  | Incontinence (Urinary/faecal)                                      | 72.26 | 1.24 | 22.17 | 82.95 | 1.43 | 29.52 | 54.73 | 0.94 | 22.75 | 39.78 | 0.68 | 25.56 |
| 9  | Gout                                                               | 22.86 | 1.23 | 22.01 | 9.85  | 0.53 | 11.01 | 27.66 | 1.49 | 36.08 | 15.32 | 0.83 | 30.90 |
| 10 | Diabetes with complication                                         | 21.71 | 1.21 | 21.53 | 14.68 | 0.82 | 16.89 | 19.79 | 1.10 | 26.59 | 16.84 | 0.94 | 34.99 |
| 11 | Polypharmacy                                                       | 96.12 | 1.20 | 21.45 | 64.75 | 0.81 | 16.77 | 92.87 | 1.16 | 28.08 | 72.07 | 0.90 | 33.70 |
| 12 | Rheumatologic disease                                              | 5.08  | 1.17 | 20.93 | 4.16  | 0.96 | 19.91 | 3.34  | 0.77 | 18.66 | 4.69  | 1.08 | 40.50 |
| 13 | Dysphagia                                                          | 24.83 | 1.16 | 20.60 | 36.49 | 1.70 | 35.13 | 29.98 | 1.40 | 33.70 | 6.09  | 0.28 | 10.58 |
| 14 | Cerebrovascular disease (including hemiplegia)                     | 29.02 | 1.14 | 20.36 | 30.75 | 1.21 | 25.04 | 28.38 | 1.12 | 26.98 | 18.79 | 0.74 | 27.62 |
| 15 | Acute confusional syndrome/delirium                                | 36.00 | 1.13 | 20.21 | 54.77 | 1.72 | 35.67 | 35.27 | 1.11 | 26.82 | 14.71 | 0.46 | 17.30 |
| 16 | Heart failure                                                      | 66.53 | 1.11 | 19.81 | 57.88 | 0.97 | 20.00 | 54.09 | 0.90 | 21.82 | 61.52 | 1.03 | 38.37 |
| 17 | Peripheral vascular disease                                        | 15.71 | 1.11 | 19.74 | 10.69 | 0.75 | 15.58 | 14.98 | 1.06 | 25.50 | 14.89 | 1.05 | 39.17 |
| 18 | Hypertension                                                       | 89.07 | 1.09 | 19.48 | 78.13 | 0.96 | 19.83 | 84.73 | 1.04 | 25.11 | 77.62 | 0.95 | 35.57 |
| 19 | Cardiac arrhythmia                                                 | 61.85 | 1.08 | 19.29 | 52.03 | 0.91 | 18.82 | 56.49 | 0.99 | 23.87 | 58.20 | 1.02 | 38.02 |
| 20 | Peptic ulcer disease                                               | 6.70  | 1.08 | 19.22 | 5.00  | 0.80 | 16.64 | 6.97  | 1.12 | 27.09 | 6.17  | 0.99 | 37.05 |
| 21 | Sensorial deficit                                                  | 39.51 | 0.93 | 16.60 | 44.27 | 1.04 | 21.58 | 43.84 | 1.03 | 24.95 | 41.89 | 0.99 | 36.87 |
| 22 | Immobility                                                         | 23.10 | 0.89 | 15.87 | 56.49 | 2.18 | 45.03 | 26.23 | 1.01 | 24.41 | 10.21 | 0.39 | 14.69 |
| 23 | Moderate or severe liver disease                                   | 2.23  | 0.87 | 15.46 | 4.33  | 1.69 | 34.91 | 0.69  | 0.27 | 6.51  | 2.96  | 1.15 | 43.11 |
| 24 | Neoplasia (including leukaemia, lymphoma, metastatic solid tumour) | 12.74 | 0.85 | 15.15 | 13.39 | 0.89 | 18.46 | 16.19 | 1.08 | 26.07 | 16.20 | 1.08 | 40.32 |
| 25 | Chronic obstructive pulmonary disease (COPD)                       | 29.97 | 0.81 | 14.48 | 27.29 | 0.74 | 15.30 | 34.75 | 0.94 | 22.75 | 46.90 | 1.27 | 47.47 |
| 26 | Mild liver disease (including chronic hepatitis B or C)            | 3.41  | 0.79 | 14.04 | 4.69  | 1.08 | 22.41 | 4.81  | 1.11 | 26.84 | 4.25  | 0.98 | 36.70 |
| 27 | Cognitive/Intellectual impairment                                  | 23.44 | 0.76 | 13.50 | 62.07 | 2.01 | 41.48 | 39.53 | 1.28 | 30.85 | 11.74 | 0.38 | 14.17 |
| 28 | Diabetes without complication                                      | 20.64 | 0.76 | 13.54 | 30.98 | 1.14 | 23.59 | 29.45 | 1.08 | 26.18 | 26.69 | 0.98 | 36.69 |
| 29 | Pressure ulcers                                                    | 7.44  | 0.58 | 10.33 | 28.11 | 2.19 | 45.28 | 16.20 | 1.26 | 30.48 | 4.78  | 0.37 | 13.90 |
| 30 | Dementia                                                           | 12.34 | 0.51 | 9.10  | 47.13 | 1.95 | 40.30 | 30.43 | 1.26 | 30.38 | 13.10 | 0.54 | 20.23 |
| 31 | Malnutrition                                                       | 8.69  | 0.44 | 7.80  | 42.75 | 2.15 | 44.50 | 13.57 | 0.68 | 16.50 | 16.60 | 0.84 | 31.20 |

1  
2  
3  
4  
5  
6  
7  
8  
9  
10  
11  
12  
13  
14  
15  
16  
17  
18  
19  
20  
21  
22  
23  
24  
25  
26  
27  
28  
29  
30  
31  
32  
33  
34  
35  
36  
37  
38  
39  
40  
41  
42  
43  
44  
45  
46

For peer review only

STROBE Statement—Checklist of items that should be included in reports of *cohort studies*

|                              | Item No | Recommendation                                                                                                                                                                                                                                                                                                         | Page No  |
|------------------------------|---------|------------------------------------------------------------------------------------------------------------------------------------------------------------------------------------------------------------------------------------------------------------------------------------------------------------------------|----------|
| <b>Title and abstract</b>    | 1       | (a) Indicate the study's design with a commonly used term in the title or the abstract<br>(b) Provide in the abstract an informative and balanced summary of what was done and what was found                                                                                                                          | 1<br>2-3 |
| <b>Introduction</b>          |         |                                                                                                                                                                                                                                                                                                                        |          |
| Background/rationale         | 2       | Explain the scientific background and rationale for the investigation being reported                                                                                                                                                                                                                                   | 4-5      |
| Objectives                   | 3       | State specific objectives, including any prespecified hypotheses                                                                                                                                                                                                                                                       | 5        |
| <b>Methods</b>               |         |                                                                                                                                                                                                                                                                                                                        |          |
| Study design                 | 4       | Present key elements of study design early in the paper                                                                                                                                                                                                                                                                | 6        |
| Setting                      | 5       | Describe the setting, locations, and relevant dates, including periods of recruitment, exposure, follow-up, and data collection                                                                                                                                                                                        | 6        |
| Participants                 | 6       | (a) Give the eligibility criteria, and the sources and methods of selection of participants. Describe methods of follow-up<br>(b) For matched studies, give matching criteria and number of exposed and unexposed                                                                                                      | 6        |
| Variables                    | 7       | Clearly define all outcomes, exposures, predictors, potential confounders, and effect modifiers. Give diagnostic criteria, if applicable                                                                                                                                                                               | 6-8      |
| Data sources/<br>measurement | 8*      | For each variable of interest, give sources of data and details of methods of assessment (measurement). Describe comparability of assessment methods if there is more than one group                                                                                                                                   | 6-8      |
| Bias                         | 9       | Describe any efforts to address potential sources of bias                                                                                                                                                                                                                                                              | 7-8      |
| Study size                   | 10      | Explain how the study size was arrived at                                                                                                                                                                                                                                                                              | 8        |
| Quantitative variables       | 11      | Explain how quantitative variables were handled in the analyses. If applicable, describe which groupings were chosen and why                                                                                                                                                                                           | 8-11     |
| Statistical methods          | 12      | (a) Describe all statistical methods, including those used to control for confounding<br>(b) Describe any methods used to examine subgroups and interactions<br>(c) Explain how missing data were addressed<br>(d) If applicable, explain how loss to follow-up was addressed<br>(e) Describe any sensitivity analyses | 8-11     |
| <b>Results</b>               |         |                                                                                                                                                                                                                                                                                                                        |          |
| Participants                 | 13*     | (a) Report numbers of individuals at each stage of study—eg numbers potentially eligible, examined for eligibility, confirmed eligible, included in the study, completing follow-up, and analysed<br>(b) Give reasons for non-participation at each stage<br>(c) Consider use of a flow diagram                        | 11       |
| Descriptive data             | 14*     | (a) Give characteristics of study participants (eg demographic, clinical, social) and information on exposures and potential confounders<br>(b) Indicate number of participants with missing data for each variable of interest<br>(c) Summarise follow-up time (eg, average and total amount)                         | 11-12    |
| Outcome data                 | 15*     | Report numbers of outcome events or summary measures over time                                                                                                                                                                                                                                                         | 12       |

|    |                          |    |                                                                                                                                                                                                              |       |
|----|--------------------------|----|--------------------------------------------------------------------------------------------------------------------------------------------------------------------------------------------------------------|-------|
| 1  | Main results             | 16 | (a) Give unadjusted estimates and, if applicable, confounder-adjusted estimates and their precision (eg, 95% confidence interval). Make clear which confounders were adjusted for and why they were included | 11-14 |
| 2  |                          |    | (b) Report category boundaries when continuous variables were categorized                                                                                                                                    |       |
| 3  |                          |    | (c) If relevant, consider translating estimates of relative risk into absolute risk for a meaningful time period                                                                                             |       |
| 4  |                          |    |                                                                                                                                                                                                              |       |
| 5  |                          |    |                                                                                                                                                                                                              |       |
| 6  |                          |    |                                                                                                                                                                                                              |       |
| 7  |                          |    |                                                                                                                                                                                                              |       |
| 8  |                          |    |                                                                                                                                                                                                              |       |
| 9  | Other analyses           | 17 | Report other analyses done—eg analyses of subgroups and interactions, and sensitivity analyses                                                                                                               | -     |
| 10 |                          |    |                                                                                                                                                                                                              |       |
| 11 | <b>Discussion</b>        |    |                                                                                                                                                                                                              |       |
| 12 |                          |    |                                                                                                                                                                                                              |       |
| 13 | Key results              | 18 | Summarise key results with reference to study objectives                                                                                                                                                     | 15-16 |
| 14 |                          |    |                                                                                                                                                                                                              |       |
| 15 | Limitations              | 19 | Discuss limitations of the study, taking into account sources of potential bias or imprecision. Discuss both direction and magnitude of any potential bias                                                   | 17-18 |
| 16 |                          |    |                                                                                                                                                                                                              |       |
| 17 | Interpretation           | 20 | Give a cautious overall interpretation of results considering objectives, limitations, multiplicity of analyses, results from similar studies, and other relevant evidence                                   | 18-19 |
| 18 |                          |    |                                                                                                                                                                                                              |       |
| 19 |                          |    |                                                                                                                                                                                                              |       |
| 20 | Generalisability         | 21 | Discuss the generalisability (external validity) of the study results                                                                                                                                        | 17    |
| 21 |                          |    |                                                                                                                                                                                                              |       |
| 22 | <b>Other information</b> |    |                                                                                                                                                                                                              |       |
| 23 | Funding                  | 22 | Give the source of funding and the role of the funders for the present study and, if applicable, for the original study on which the present article is based                                                | 20    |
| 24 |                          |    |                                                                                                                                                                                                              |       |
| 25 |                          |    |                                                                                                                                                                                                              |       |

\*Give information separately for exposed and unexposed groups.

**Note:** An Explanation and Elaboration article discusses each checklist item and gives methodological background and published examples of transparent reporting. The STROBE checklist is best used in conjunction with this article (freely available on the Web sites of PLoS Medicine at <http://www.plosmedicine.org/>, Annals of Internal Medicine at <http://www.annals.org/>, and Epidemiology at <http://www.epidem.com/>). Information on the STROBE Initiative is available at <http://www.strobe-statement.org>.
