# Supplementary material for: Multimorbidity patterns of chronic conditions and geriatric syndromes in older patients from the MoPIM multicentre cohort study
Source: PubMed Central journal article supplement — BMJ Open. 2021 Nov 15;11(11):e049334. doi: 10.1136/bmjopen-2021-049334 (PMC8593730; doi:10.1136/bmjopen-2021-049334), 2021-11-15
Supplement: bmjopen-2021-049334supp001.pdf [file bmjopen-2021-049334supp001.pdf]

Supplemental Table 1. Chronic conditions and geriatric syndromes recorded.

| Chronic conditions                       | Geriatric syndromes and risk factors |
|------------------------------------------|--------------------------------------|
| <b>Charlson Index</b>                    |                                      |
| 1. AIDS/HIV                              | Acute confusional syndrome/delirium  |
| 2. Any malignancy (excluding skin)       | Chronic pain                         |
| 3. Cerebrovascular disease               | Cognitive/Intellectual impairment    |
| 4. Chronic obstructive pulmonary disease | Constipation                         |
| 5. Congestive heart failure              | Depression or Anxiety                |
| 6. Dementia                              | Dysphagia                            |
| 7. Diabetes with complication            | Frailty                              |
| 8. Diabetes without complication         | Immobility                           |
| 9. Hemiplegia                            | Incontinence (Urinary/faecal)        |
| 10. Leukaemia                            | Instability/falls                    |
| 11. Lymphoma                             | Malnutrition                         |
| 12. Metastatic solid tumour              | Polypharmacy                         |
| 13. Mild liver disease                   | Pressure ulcers                      |
| 14. Moderate or severe liver disease     | Sensorial deficit                    |
| 15. Moderate or severe renal disease     | Sleep disorders/Insomnia             |
| 16. Myocardial infarction                |                                      |
| 17. Peptic ulcer disease                 |                                      |
| 18. Peripheral vascular disease          |                                      |
| 19. Rheumatologic disease                |                                      |
| <b>Other conditions</b>                  |                                      |
| 20. Amputation                           |                                      |
| 21. Anaemia                              |                                      |
| 22. Asthma                               |                                      |
| 23. Cardiac arrhythmia                   |                                      |
| 24. Cataract                             |                                      |
| 25. Chronic hepatitis (B or C)           |                                      |
| 26. Chronic pancreatic disease           |                                      |
| 27. Degenerative arthropathy             |                                      |
| 28. Dermatitis or eczema                 |                                      |

- 
29. Diverticular disease of the colon
  30. Drug-related conditions
  31. Dyslipidaemia (risk factor)
  32. Fibromyalgia
  33. Gallstones (previous hepatic colic)
  34. Chronic gastritis or gastro-oesophageal reflux
  35. Glaucoma
  36. Gout
  37. Haemorrhoids
  38. Haematologic disorders (myelodysplastic syndrome, gammopathy, polycythaemia)
  39. Hypertension (risk factor)
  40. Inflammatory osteoarticular disease
  41. Irritable bowel syndrome
  42. Ischaemic heart disease without infarction
  43. Migraine
  44. Neurologic disorder of the central nervous system
  45. Non-congestive heart failure
  46. Non-ischaemic heart disease (miocardiopathy, valvulopathy)
  47. Non-schizophrenic mental disorders (excluding depression and anxiety)
  48. Obesity (risk factor)
  49. Osteoporosis (risk factor)
  50. Other neurological pathologies (essential tremor)
  51. Other vascular diseases (ischaemia, aneurism)
  52. Parkinson

- 
57. Prostatic benign hypertrophy
  58. Schizophrenia
  59. Sleep apnoea
  60. Chronic thyroid disease
  61. Tuberculosis
  62. Urinary tract stones (nephritic colic)
  63. Varicose veins of lower extremities
  64. Vertigo
-

**Supplemental Table 2.** Prevalence rates of chronic conditions and geriatric syndromes / risk factors in the study population by sex, separately listed in decreasing order of total prevalence rate.

|                                                                    | Female (394) |       |               | Male (346) |       |               | Total (740) |       |               |
|--------------------------------------------------------------------|--------------|-------|---------------|------------|-------|---------------|-------------|-------|---------------|
|                                                                    | N            | %     | 95% CI        | N          | %     | 95% CI        | N           | %     | 95%CI         |
| <b>CHRONIC CONDITIONS</b>                                          |              |       |               |            |       |               |             |       |               |
| <b>Risk factors</b>                                                |              |       |               |            |       |               |             |       |               |
| Hypertension                                                       | 330          | 83.76 | 79.79 - 87.07 | 273        | 78.90 | 74.30 - 82.87 | 603         | 81.49 | 78.53 - 84.12 |
| Dyslipidaemia                                                      | 189          | 47.97 | 43.08 - 52.90 | 171        | 49.42 | 44.19 - 54.67 | 360         | 48.65 | 45.06 - 52.25 |
| Obesity                                                            | 127          | 32.23 | 27.81 - 37.00 | 66         | 19.08 | 15.28 - 23.55 | 193         | 26.08 | 23.05 - 29.36 |
| Osteoporosis                                                       | 82           | 20.81 | 17.09 - 25.09 | 21         | 6.07  | 4.00 - 9.10   | 103         | 13.92 | 11.61 - 16.60 |
| Drug-related conditions                                            | 44           | 11.17 | 8.42 - 14.66  | 23         | 6.65  | 4.47 - 9.78   | 67          | 9.05  | 7.19 - 11.34  |
| <b>Chronic Diseases</b>                                            |              |       |               |            |       |               |             |       |               |
| Heart failure                                                      | 255          | 64.72 | 59.88 - 69.28 | 188        | 54.34 | 49.07 - 59.51 | 443         | 59.86 | 56.29 - 63.34 |
| Cardiac arrhythmia                                                 | 216          | 54.82 | 49.89 - 59.67 | 207        | 59.83 | 54.58 - 64.86 | 423         | 57.16 | 53.57 - 60.68 |
| Degenerative arthropathy                                           | 228          | 57.87 | 52.94 - 62.64 | 157        | 45.38 | 40.21 - 50.64 | 385         | 52.03 | 48.43 - 55.61 |
| Anaemia                                                            | 182          | 46.19 | 41.33 - 51.13 | 152        | 43.93 | 38.80 - 49.20 | 334         | 45.14 | 41.58 - 48.74 |
| Moderate or severe renal disease                                   | 164          | 41.62 | 36.86 - 46.55 | 156        | 45.09 | 39.93 - 50.35 | 320         | 43.24 | 39.72 - 46.84 |
| Chronic obstructive pulmonary disease (COPD)                       | 90           | 22.84 | 18.97 - 27.24 | 183        | 52.89 | 47.63 - 58.09 | 273         | 36.89 | 33.49 - 40.43 |
| Non-ischaemic heart disease                                        | 125          | 31.73 | 27.33 - 36.48 | 113        | 32.66 | 27.93 - 37.77 | 238         | 32.16 | 28.90 - 35.61 |
| Diabetes without complication                                      | 101          | 25.63 | 21.57 - 30.17 | 100        | 28.90 | 24.38 - 33.89 | 201         | 27.16 | 24.08 - 30.48 |
| Cerebrovascular disease (including hemiplegia)                     | 95           | 24.11 | 20.15 - 28.57 | 93         | 26.88 | 22.48 - 31.78 | 188         | 25.41 | 22.40 - 28.66 |
| Dementia                                                           | 103          | 26.14 | 22.05 - 30.70 | 76         | 21.97 | 17.92 - 26.62 | 179         | 24.19 | 21.24 - 27.40 |
| Varicose veins of lower extremities                                | 98           | 24.87 | 20.86 - 29.37 | 66         | 19.08 | 15.28 - 23.55 | 164         | 22.16 | 19.32 - 25.29 |
| Previous fracture (not hip)                                        | 87           | 22.08 | 18.27 - 26.44 | 52         | 15.03 | 11.65 - 19.18 | 139         | 18.78 | 16.13 - 21.76 |
| Gout                                                               | 57           | 14.47 | 11.34 - 18.28 | 80         | 23.12 | 18.99 - 27.84 | 137         | 18.51 | 15.88 - 21.47 |
| Chronic thyroid disease                                            | 93           | 23.60 | 19.68 - 28.04 | 42         | 12.14 | 9.11 - 16.00  | 135         | 18.24 | 15.63 - 21.19 |
| Diabetes with complication                                         | 70           | 17.77 | 14.31 - 21.85 | 63         | 18.21 | 14.50 - 22.62 | 133         | 17.97 | 15.37 - 20.90 |
| Ischaemic heart disease without infarction                         | 58           | 14.72 | 11.56 - 18.56 | 62         | 17.92 | 14.24 - 22.31 | 120         | 16.22 | 13.74 - 19.05 |
| Myocardial infarction                                              | 47           | 11.93 | 9.09 - 15.50  | 64         | 18.50 | 14.76 - 22.93 | 111         | 15.00 | 12.61 - 17.75 |
| Neoplasia (including leukaemia, lymphoma, metastatic solid tumour) | 29           | 7.36  | 5.17 - 10.37  | 82         | 23.70 | 19.52 - 28.45 | 111         | 15.00 | 12.61 - 17.75 |
| Peripheral vascular disease                                        | 31           | 7.87  | 5.60 - 10.95  | 74         | 21.39 | 17.39 - 26.01 | 105         | 14.19 | 11.86 - 16.89 |
| Chronic gastritis or gastro-oesophageal reflux                     | 55           | 13.96 | 10.88 - 17.73 | 42         | 12.14 | 9.11 - 16.00  | 97          | 13.11 | 10.87 - 15.73 |

|                                     | Female (394) |       |               | Male (346) |       |              | Total (740) |       |              |
|-------------------------------------|--------------|-------|---------------|------------|-------|--------------|-------------|-------|--------------|
|                                     | N            | %     | 95% CI        | N          | %     | 95% CI       | N           | %     | 95%CI        |
| Asthma                              | 74           | 18.78 | 15.23 - 22.93 | 8          | 2.31  | 1.18 - 4.50  | 82          | 11.08 | 9.02 - 13.55 |
| Gallstones                          | 39           | 9.90  | 7.33 - 13.25  | 40         | 11.56 | 8.61 - 15.36 | 79          | 10.68 | 8.65 - 13.11 |
| Vertigo                             | 54           | 13.71 | 10.66 - 17.45 | 23         | 6.65  | 4.47 - 9.78  | 77          | 10.41 | 8.41 - 12.81 |
| Previous hip fracture               | 52           | 13.20 | 10.21 - 16.90 | 15         | 4.34  | 2.64 - 7.03  | 67          | 9.05  | 7.19 - 11.34 |
| Sleep apnoea                        | 34           | 8.63  | 6.24 - 11.82  | 32         | 9.25  | 6.63 - 12.76 | 66          | 8.92  | 7.07 - 11.19 |
| Peripheral neuropathy or neuritis   | 27           | 6.85  | 4.75 - 9.79   | 34         | 9.83  | 7.12 - 13.42 | 61          | 8.24  | 6.47 - 10.45 |
| Inflammatory osteoarticular disease | 26           | 6.60  | 4.54 - 9.49   | 23         | 6.65  | 4.47 - 9.78  | 49          | 6.62  | 5.04 - 8.65  |
| Peptic ulcer disease                | 11           | 2.79  | 1.57 - 4.93   | 35         | 10.12 | 7.36 - 13.74 | 46          | 6.22  | 4.69 - 8.19  |
| Haematologic disorders              | 14           | 3.55  | 2.13 - 5.88   | 22         | 6.36  | 4.24 - 9.44  | 36          | 4.86  | 3.53 - 6.66  |
| Parkinson                           |              |       |               |            |       |              |             |       |              |

|                                       | Female (394) |       |               | Male (346) |       |               | Total (740) |       |               |
|---------------------------------------|--------------|-------|---------------|------------|-------|---------------|-------------|-------|---------------|
|                                       | N            | %     | 95% CI        | N          | %     | 95% CI        | N           | %     | 95%CI         |
| Sleep disorders/Insomnia              | 189          | 47.97 | 43.08 - 52.90 | 144        | 41.62 | 36.54 - 46.88 | 333         | 45.00 | 41.45 - 48.60 |
| Sensorial deficit                     | 169          | 42.89 | 38.10 - 47.83 | 145        | 41.91 | 36.83 - 47.17 | 314         | 42.43 | 38.92 - 46.02 |
| Instability/falls                     | 158          | 40.10 | 35.38 - 45.01 | 128        | 36.99 | 32.08 - 42.20 | 286         | 38.65 | 35.21 - 42.21 |
| Depression or anxiety                 | 193          | 48.98 | 44.08 - 53.91 | 75         | 21.68 | 17.66 - 26.32 | 268         | 36.22 | 32.83 - 39.74 |
| Acute confusional syndrome / delirium | 118          | 29.95 | 25.64 - 34.65 | 117        | 33.82 | 29.03 - 38.95 | 235         | 31.76 | 28.50 - 35.20 |
| Cognitive/Intellectual impairment     | 133          | 33.76 | 29.26 - 38.56 | 96         | 27.75 | 23.29 - 32.69 | 229         | 30.95 | 27.72 - 34.37 |
| Immobility                            | 114          | 28.93 | 24.68 - 33.60 | 78         | 22.54 | 18.46 - 27.23 | 192         | 25.95 | 22.92 - 29.22 |
| Dysphagia                             | 78           | 19.80 | 16.16 - 24.01 | 81         | 23.41 | 19.26 - 28.15 | 159         | 21.49 | 18.68 - 24.59 |
| Malnutrition                          | 76           | 19.29 | 15.70 - 23.47 | 71         | 20.52 | 16.60 - 25.09 | 147         | 19.86 | 17.15 - 22.89 |
| Pressure ulcers                       | 57           | 14.47 | 11.34 - 18.28 | 38         | 10.98 | 8.11 - 14.72  | 95          | 12.84 | 10.62 - 15.44 |

**Supplemental Table 3.** Weight as an indicator of importance on clinical management assigned to each chronic condition. Weight values range from 0 to 8, where 0 means no clinical management was required and 1 to 8 indicate clinical management from main cause of hospitalization (1) to chronic condition requiring the least medical attention (8). Chronic conditions are displayed in alphabetical order.

| Chronic conditions                             | Weight 0 |       | Weight 1 |       | Weight 2 |       | Weight 3 |      | Weight 4 |      | Weight 5 |      | Weight 6 |      | Weight 7 |      | Weight 8 |   |
|------------------------------------------------|----------|-------|----------|-------|----------|-------|----------|------|----------|------|----------|------|----------|------|----------|------|----------|---|
|                                                | N        | %     | N        | %     | N        | %     | N        | %    | N        | %    | N        | %    | N        | %    | N        | %    | N        | % |
| AIDS/HIV                                       | 740      | 100   | 0        | 0     | 0        | 0     | 0        | 0    | 0        | 0    | 0        | 0    | 0        | 0    | 0        | 0    | 0        | 0 |
| Amputation                                     | 739      | 99.86 | 0        | 0     | 1        | 0.14  | 0        | 0    | 0        | 0    | 0        | 0    | 0        | 0    | 0        | 0    | 0        | 0 |
| Anaemia                                        | 596      | 80.54 | 28       | 3.78  | 46       | 6.22  | 40       | 5.41 | 19       | 2.57 | 8        | 1.08 | 3        | 0.41 | 0        | 0    | 0        | 0 |
| Asthma                                         | 704      | 95.14 | 30       | 4.05  | 3        | 0.41  | 2        | 0.27 | 1        | 0.14 | 0        | 0    | 0        | 0    | 0        | 0    | 0        | 0 |
| Rheumatologic disease                          | 729      | 98.51 | 5        | 0.68  | 3        | 0.41  | 3        | 0.41 | 0        | 0    | 0        | 0    | 0        | 0    | 0        | 0    | 0        | 0 |
| Cardiac arrhythmia                             | 595      | 80.41 | 35       | 4.73  | 69       | 9.32  | 28       | 3.78 | 10       | 1.35 | 3        | 0.41 | 0        | 0    | 0        | 0    | 0        | 0 |
| Cerebrovascular disease (including hemiplegia) | 703      | 95    | 28       | 3.78  | 3        | 0.41  | 3        | 0.41 | 2        | 0.27 | 1        | 0.14 | 0        | 0    | 0        | 0    | 0        | 0 |
| Chronic gastritis or gastro-oesophageal reflux | 733      | 99.05 | 4        | 0.54  | 1        | 0.14  | 1        | 0.14 | 1        | 0.14 | 0        | 0    | 0        | 0    | 0        | 0    | 0        | 0 |
| Chronic pancreatic disease                     | 739      | 99.86 | 0        | 0     | 1        | 0.14  | 0        | 0    | 0        | 0    | 0        | 0    | 0        | 0    | 0        | 0    | 0        | 0 |
| Chronic obstructive pulmonary disease (COPD)   | 554      | 74.86 | 153      | 20.68 | 19       | 2.57  | 8        | 1.08 | 5        | 0.68 | 0        | 0    | 1        | 0.14 | 0        | 0    | 0        | 0 |
| Chronic thyroid disease                        | 722      | 97.57 | 2        | 0.27  | 1        | 0.14  | 4        | 0.54 | 7        | 0.95 | 3        | 0.41 | 1        | 0.14 | 0        | 0    | 0        | 0 |
| Degenerative arthropathy                       | 718      | 97.03 | 3        | 0.41  | 7        | 0.95  | 4        | 0.54 | 4        | 0.54 | 3        | 0.41 | 1        | 0.14 | 0        | 0    | 0        | 0 |
| Dementia                                       | 687      | 92.84 | 32       | 4.32  | 14       | 1.89  | 4        | 0.54 | 3        | 0.41 | 0        | 0    | 0        | 0    | 0        | 0    | 0        | 0 |
| Diabetes with complication                     | 710      | 95.95 | 9        | 1.22  | 7        | 0.95  | 5        | 0.68 | 4        | 0.54 | 2        | 0.27 | 3        | 0.41 | 0        | 0    | 0        | 0 |
| Diabetes without complication                  | 698      | 94.32 | 11       | 1.49  | 5        | 0.68  | 13       | 1.76 | 8        | 1.08 | 2        | 0.27 | 1        | 0.14 | 2        | 0.27 | 0        | 0 |
| Drug-related conditions                        | 722      | 97.57 | 5        | 0.68  | 3        | 0.41  | 3        | 0.41 | 4        | 0.54 | 1        | 0.14 | 1        | 0.14 | 1        | 0.14 | 0        | 0 |
| Dyslipidaemia                                  | 735      | 99.32 | 0        | 0     | 0        | 0     | 0        | 0    | 4        | 0.54 | 1        | 0.14 | 0        | 0    | 0        | 0    | 0        | 0 |
| Fibromyalgia                                   | 739      | 99.86 | 0        | 0     | 1        | 0.14  | 0        | 0    | 0        | 0    | 0        | 0    | 0        | 0    | 0        | 0    | 0        | 0 |
| Gallstones                                     | 730      | 98.65 | 6        | 0.81  | 3        | 0.41  | 1        | 0.14 | 0        | 0    | 0        | 0    | 0        | 0    | 0        | 0    | 0        | 0 |
| Gout                                           | 737      | 99.59 | 0        | 0     | 0        | 0     | 2        | 0.27 | 0        | 0    | 1        | 0.14 | 0        | 0    | 0        | 0    | 0        | 0 |
| Haematologic disorders                         | 730      | 98.65 | 2        | 0.27  | 5        | 0.68  | 2        | 0.27 | 1        | 0.14 | 0        | 0    | 0        | 0    | 0        | 0    | 0        | 0 |
| Heart failure                                  | 410      | 55.41 | 227      | 30.68 | 85       | 11.49 | 13       | 1.76 | 4        | 0.54 | 0        | 0    | 1        | 0.14 | 0        | 0    | 0        | 0 |
| Hypertension                                   | 698      | 94.32 | 10       | 1.35  | 14       | 1.89  | 12       | 1.62 | 4        | 0.54 | 2        | 0.27 | 0        | 0    | 0        | 0    | 0        | 0 |
| Inflammatory osteoarticular disease            | 727      | 98.24 | 8        | 1.08  | 1        | 0.14  | 1        | 0.14 | 1        | 0.14 | 1        | 0.14 | 1        | 0.14 | 0        | 0    | 0        | 0 |
| Irritable bowel syndrome                       | 740      | 100   | 0        | 0     | 0        | 0     | 0        | 0    | 0        | 0    | 0        | 0    | 0        | 0    | 0        | 0    | 0        | 0 |
| Ischaemic heart disease without infarction     | 714      | 96.49 | 10       | 1.35  | 14       | 1.89  | 1        | 0.14 | 0        | 0    | 1        | 0.14 | 0        | 0    | 0        | 0    | 0        | 0 |

|                                                                    |     |       |    |      |    |       |    |      |    |      |   |      |   |      |   |   |      |
|--------------------------------------------------------------------|-----|-------|----|------|----|-------|----|------|----|------|---|------|---|------|---|---|------|
| Migraine                                                           | 740 | 100   | 0  | 0    | 0  | 0     | 0  | 0    | 0  | 0    | 0 | 0    | 0 | 0    | 0 | 0 | 0    |
| Mild liver disease (including chronic hepatitis B or C)            | 733 | 99.05 | 5  | 0.68 | 0  | 0     | 1  | 0.14 | 0  | 0    | 0 | 0    | 0 | 0    | 0 | 1 | 0.14 |
| Moderate or severe liver disease                                   | 724 | 97.84 | 12 | 1.62 | 2  | 0.27  | 1  | 0.14 | 0  | 0    | 1 | 0.14 | 0 | 0    | 0 | 0 | 0    |
| Moderate or severe renal disease                                   | 552 | 74.59 | 39 | 5.27 | 77 | 10.41 | 44 | 5.95 | 23 | 3.11 | 4 | 0.54 | 1 | 0.14 | 0 | 0 | 0    |
| Myocardial infarction                                              | 716 | 96.76 | 20 | 2.7  | 3  | 0.41  | 1  | 0.14 | 0  | 0    | 0 | 0    | 0 | 0    | 0 | 0 | 0    |
| Neoplasia (including leukaemia, lymphoma, metastatic solid tumour) | 724 | 97.84 | 5  | 0.68 | 7  | 0.95  | 1  | 0.14 | 1  | 0.14 | 2 | 0.27 | 0 | 0    | 0 | 0 | 0    |
| Neurologic disorder of the CNS                                     | 736 | 99.46 | 2  | 0.27 | 2  | 0.27  | 0  | 0    | 0  | 0    | 0 | 0    | 0 | 0    | 0 | 0 | 0    |
| Non-ischaeamic heart disease                                       | 695 | 93.92 | 15 | 2.03 | 16 | 2.16  | 12 | 1.62 | 0  | 0    | 2 | 0.27 | 0 | 0    | 0 | 0 | 0    |
| Non-schizophrenic mental disorders                                 | 732 | 98.92 | 2  | 0.27 | 2  | 0.27  | 1  | 0.14 | 2  | 0.27 | 1 | 0.14 | 0 | 0    | 0 | 0 | 0    |
| Obesity                                                            | 737 | 99.59 | 0  | 0    | 1  | 0.14  | 2  | 0.27 | 0  | 0    | 0 | 0    | 0 | 0    | 0 | 0 | 0    |
| Osteoporosis                                                       | 730 | 98.65 | 2  | 0.27 | 3  | 0.41  | 2  | 0.27 | 2  | 0.27 | 0 | 0    | 1 | 0.14 | 0 | 0 | 0    |
| Other neurological pathologies                                     | 740 | 100   | 0  | 0    | 0  | 0     | 0  | 0    | 0  | 0    | 0 | 0    | 0 | 0    | 0 | 0 | 0    |
| Parkinson's disease                                                | 737 | 99.59 | 3  | 0.41 | 0  | 0     | 0  | 0    | 0  | 0    | 0 | 0    | 0 | 0    | 0 | 0 | 0    |
| Peptic ulcer disease                                               | 737 | 99.59 | 2  | 0.27 | 1  | 0.14  | 0  | 0    | 0  | 0    | 0 | 0    | 0 | 0    | 0 | 0 | 0    |
| Peripheral neuropathy or neuritis                                  | 737 | 99.59 | 1  | 0.14 | 1  | 0.14  | 1  | 0.14 | 0  | 0    | 0 | 0    | 0 | 0    | 0 | 0 | 0    |
| Peripheral vascular disease                                        | 728 | 98.38 | 9  | 1.22 | 1  | 0.14  | 1  | 0.14 | 0  | 0    | 0 | 0    | 1 | 0.14 | 0 | 0 | 0    |
| Post-traumatic stress disorder                                     | 739 | 99.86 | 1  | 0.14 | 0  | 0     | 0  | 0    | 0  | 0    | 0 | 0    | 0 | 0    | 0 | 0 | 0    |
| Previous fracture (not hip)                                        | 730 | 98.65 | 5  | 0.68 | 2  | 0.27  | 2  | 0.27 | 1  | 0.14 | 0 | 0    | 0 | 0    | 0 | 0 | 0    |
| Previous hip fracture                                              | 740 | 100   | 0  | 0    | 0  | 0     | 0  | 0    | 0  | 0    | 0 | 0    | 0 | 0    | 0 | 0 | 0    |
| Schizophrenia                                                      | 740 | 100   | 0  | 0    | 0  | 0     | 0  | 0    | 0  | 0    | 0 | 0    | 0 | 0    | 0 | 0 | 0    |
| Sleep apnoea                                                       | 716 | 96.76 | 5  | 0.68 | 9  | 1.22  | 5  | 0.68 | 1  | 0.14 | 4 | 0.54 | 0 | 0    | 0 | 0 | 0    |
| Tuberculosis                                                       | 740 | 100   | 0  | 0    | 0  | 0     | 0  | 0    | 0  | 0    | 0 | 0    | 0 | 0    | 0 | 0 | 0    |
| Urinary tract stones                                               | 740 | 100   | 0  | 0    | 0  | 0     | 0  | 0    | 0  | 0    | 0 | 0    | 0 | 0    | 0 | 0 | 0    |
| Varicose veins of lower extremities                                | 725 | 97.97 | 1  | 0.14 | 6  | 0.81  | 2  | 0.27 | 4  | 0.54 | 2 | 0.27 | 0 | 0    | 0 | 0 | 0    |
| Vertigo                                                            | 740 | 100   | 0  | 0    | 0  | 0     | 0  | 0    | 0  | 0    | 0 | 0    | 0 | 0    | 0 | 0 | 0    |



**Supplemental table 4.** Prevalence, Observed/Expected (O/E) ratios and exclusivity of chronic conditions and geriatric syndromes / risk factors per multimorbidity cluster. Conditions with prevalence >2% were included. O/E ratios were calculated by dividing the prevalence of a disease within the cluster by its prevalence in the overall population. Exclusivity was calculated by dividing the number of patients with the disease in the cluster by the total number of participants with the disease. Conditions are ordered by decreasing O/E ratio of cluster 1.

|                                                             | Cluster 1      |           |                 | Cluster 2      |           |                 | Cluster 3      |           |                 | Cluster 4      |           |                 |
|-------------------------------------------------------------|----------------|-----------|-----------------|----------------|-----------|-----------------|----------------|-----------|-----------------|----------------|-----------|-----------------|
|                                                             | Prevalence (%) | O/E ratio | Exclusivity (%) | Prevalence (%) | O/E ratio | Exclusivity (%) | Prevalence (%) | O/E ratio | Exclusivity (%) | Prevalence (%) | O/E ratio | Exclusivity (%) |
| Vertigo                                                     | 29.58          | 2.84      | 50.67           | 9.52           | 0.91      | 18.92           | 6.85           | 0.66      | 15.90           | 4.05           | 0.39      | 14.52           |
| Sleep apnoea                                                | 22.11          | 2.48      | 44.19           | 5.82           | 0.65      | 13.50           | 8.12           | 0.91      | 21.99           | 4.85           | 0.54      | 20.33           |
| Osteoporosis                                                | 33.39          | 2.40      | 42.76           | 9.95           | 0.71      | 14.79           | 9.44           | 0.68      | 16.38           | 9.72           | 0.70      | 26.07           |
| Previous fracture (not hip)                                 | 39.67          | 2.11      | 37.65           | 17.87          | 0.95      | 19.68           | 15.16          | 0.81      | 19.49           | 11.66          | 0.62      | 23.19           |
| Inflammatory osteoarticular disease                         | 13.61          | 2.06      | 36.65           | 2.78           | 0.42      | 8.69            | 7.21           | 1.09      | 26.31           | 5.03           | 0.76      | 28.36           |
| Asthma                                                      | 22.50          | 2.03      | 36.19           | 9.37           | 0.85      | 17.49           | 7.77           | 0.70      | 16.94           | 8.72           | 0.79      | 29.37           |
| Varicose veins of lower extremities                         | 44.58          | 2.01      | 35.86           | 15.2           | 0.69      | 14.19           | 24.37          | 1.10      | 26.56           | 13.89          | 0.63      | 23.40           |
| Amputation                                                  | 4.190          | 1.94      | 34.56           | 1.72           | 0.8       | 16.45           | 2.00           | 0.92      | 22.30           | 1.55           | 0.71      | 26.69           |
| Peripheral neuropathy or neuritis                           | 15.37          | 1.86      | 33.23           | 6.00           | 0.73      | 15.06           | 9.03           | 1.10      | 26.46           | 5.58           | 0.68      | 25.26           |
| Drug-related conditions                                     | 16.31          | 1.80      | 32.12           | 11.23          | 1.24      | 25.66           | 7.41           | 0.82      | 19.76           | 5.45           | 0.60      | 22.46           |
| Chronic thyroid disease                                     | 32.14          | 1.76      | 31.40           | 13.73          | 0.75      | 15.57           | 16.06          | 0.88      | 21.26           | 15.52          | 0.85      | 31.77           |
| Ischaemic heart disease without infarction                  | 27.75          | 1.71      | 30.5            | 10.85          | 0.67      | 13.84           | 17.59          | 1.08      | 26.20           | 12.79          | 0.79      | 29.46           |
| Obesity                                                     | 44.29          | 1.70      | 30.27           | 19.14          | 0.73      | 15.18           | 25.15          | 0.96      | 23.28           | 21.84          | 0.84      | 31.27           |
| Chronic pain                                                | 91.68          | 1.69      | 30.09           | 50.3           | 0.93      | 19.15           | 59.72          | 1.10      | 26.55           | 35.23          | 0.65      | 24.22           |
| Instability/falls                                           | 65.05          | 1.68      | 30.00           | 36.74          | 0.95      | 19.66           | 40.06          | 1.04      | 25.03           | 26.19          | 0.68      | 25.30           |
| Depression or Anxiety                                       | 60.05          | 1.66      | 29.56           | 35.49          | 0.98      | 20.27           | 30.57          | 0.84      | 20.38           | 28.89          | 0.80      | 29.79           |
| Neurologic disorder of the CNS                              | 7.10           | 1.64      | 29.28           | 4.92           | 1.14      | 23.54           | 4.78           | 1.11      | 26.72           | 2.37           | 0.55      | 20.47           |
| Previous hip fracture                                       | 14.76          | 1.63      | 29.06           | 9.23           | 1.02      | 21.08           | 6.20           | 0.69      | 16.55           | 8.08           | 0.89      | 33.31           |
| Degenerative arthropathy                                    | 80.19          | 1.54      | 27.48           | 48.11          | 0.92      | 19.13           | 56.15          | 1.08      | 26.06           | 38.08          | 0.73      | 27.34           |
| Chronic gastritis or gastro-oesophageal reflux<br>Parkinson | 19.39          | 1.48      | 26.37           | 9.09           | 0.69      | 14.35           | 12.6           | 0.96      | 23.22           | 12.66          | 0.97      | 36.07           |

|                                                                    |       |      |       |       |      |       |       |      |       |       |      |       |
|--------------------------------------------------------------------|-------|------|-------|-------|------|-------|-------|------|-------|-------|------|-------|
| Myocardial infarction                                              | 19.88 | 1.33 | 23.63 | 10.00 | 0.67 | 13.79 | 14.68 | 0.98 | 23.64 | 15.64 | 1.04 | 38.94 |
| Dyslipidaemia                                                      | 64.28 | 1.32 | 23.55 | 35.21 | 0.72 | 14.97 | 55.63 | 1.14 | 27.62 | 44.11 | 0.91 | 33.86 |
| Frailty                                                            | 81.11 | 1.31 | 23.41 | 82.71 | 1.34 | 27.70 | 55.05 | 0.89 | 21.53 | 45.26 | 0.73 | 27.36 |
| Anaemia                                                            | 59.26 | 1.31 | 23.40 | 42.23 | 0.94 | 19.35 | 47.71 | 1.06 | 25.53 | 38.34 | 0.85 | 31.72 |
| Gallstones                                                         | 13.87 | 1.30 | 23.16 | 10.6  | 0.99 | 20.54 | 9.66  | 0.90 | 21.85 | 9.85  | 0.92 | 34.46 |
| Haematologic disorders                                             | 6.24  | 1.28 | 22.88 | 2.80  | 0.58 | 11.91 | 6.24  | 1.28 | 30.99 | 4.46  | 0.92 | 34.22 |
| Constipation                                                       | 57.53 | 1.25 | 22.32 | 58.53 | 1.27 | 26.35 | 36.80 | 0.80 | 19.34 | 39.36 | 0.86 | 31.99 |
| Incontinence (Urinary/faecal)                                      | 72.26 | 1.24 | 22.17 | 82.95 | 1.43 | 29.52 | 54.73 | 0.94 | 22.75 | 39.78 | 0.68 | 25.56 |
| Gout                                                               | 22.86 | 1.23 | 22.01 | 9.85  | 0.53 | 11.01 | 27.66 | 1.49 | 36.08 | 15.32 | 0.83 | 30.90 |
| Diabetes with complication                                         | 21.71 | 1.21 | 21.53 | 14.68 | 0.82 | 16.89 | 19.79 | 1.10 | 26.59 | 16.84 | 0.94 | 34.99 |
| Polypharmacy                                                       | 96.12 | 1.20 | 21.45 | 64.75 | 0.81 | 16.77 | 92.87 | 1.16 | 28.08 | 72.07 | 0.90 | 33.70 |
| Rheumatologic disease                                              | 5.08  | 1.17 | 20.93 | 4.16  | 0.96 | 19.91 | 3.34  | 0.77 | 18.66 | 4.69  | 1.08 | 40.50 |
| Dysphagia                                                          | 24.83 | 1.16 | 20.60 | 36.49 | 1.70 | 35.13 | 29.98 | 1.40 | 33.70 | 6.09  | 0.28 | 10.58 |
| Cerebrovascular disease (including hemiplegia)                     | 29.02 | 1.14 | 20.36 | 30.75 | 1.21 | 25.04 | 28.38 | 1.12 | 26.98 | 18.79 | 0.74 | 27.62 |
| Acute confusional syndrome/delirium                                | 36.00 | 1.13 | 20.21 | 54.77 | 1.72 | 35.67 | 35.27 | 1.11 | 26.82 | 14.71 | 0.46 | 17.30 |
| Heart failure                                                      | 66.53 | 1.11 | 19.81 | 57.88 | 0.97 | 20.00 | 54.09 | 0.90 | 21.82 | 61.52 | 1.03 | 38.37 |
| Peripheral vascular disease                                        | 15.71 | 1.11 | 19.74 | 10.69 | 0.75 | 15.58 | 14.98 | 1.06 | 25.50 | 14.89 | 1.05 | 39.17 |
| Hypertension                                                       | 89.07 | 1.09 | 19.48 | 78.13 | 0.96 | 19.83 | 84.73 | 1.04 | 25.11 | 77.62 | 0.95 | 35.57 |
| Cardiac arrhythmia                                                 | 61.85 | 1.08 | 19.29 | 52.03 | 0.91 | 18.82 | 56.49 | 0.99 | 23.87 | 58.20 | 1.02 | 38.02 |
| Peptic ulcer disease                                               | 6.70  | 1.08 | 19.22 | 5.00  | 0.80 | 16.64 | 6.97  | 1.12 | 27.09 | 6.17  | 0.99 | 37.05 |
| Sensorial deficit                                                  | 39.51 | 0.93 | 16.60 | 44.27 | 1.04 | 21.58 | 43.84 | 1.03 | 24.95 | 41.89 | 0.99 | 36.87 |
| Immobility                                                         | 23.10 | 0.89 | 15.87 | 56.49 | 2.18 | 45.03 | 26.23 | 1.01 | 24.41 | 10.21 | 0.39 | 14.69 |
| Moderate or severe liver disease                                   | 2.23  | 0.87 | 15.46 | 4.33  | 1.69 | 34.91 | 0.69  | 0.27 | 6.51  | 2.96  | 1.15 | 43.11 |
| Neoplasia (including leukaemia, lymphoma, metastatic solid tumour) | 12.74 | 0.85 | 15.15 | 13.39 | 0.89 | 18.46 | 16.19 | 1.08 | 26.07 | 16.20 | 1.08 | 40.32 |
| Chronic obstructive pulmonary disease (COPD)                       | 29.97 | 0.81 | 14.48 | 27.29 | 0.74 | 15.30 | 34.75 | 0.94 | 22.75 | 46.90 | 1.27 | 47.47 |
| Mild liver disease (including chronic hepatitis B or C)            | 3.41  | 0.79 | 14.04 | 4.69  | 1.08 | 22.41 | 4.81  | 1.11 | 26.84 | 4.25  | 0.98 | 36.70 |
| Cognitive/Intellectual impairment                                  | 23.44 | 0.76 | 13.50 | 62.07 | 2.01 | 41.48 | 39.53 | 1.28 | 30.85 | 11.74 | 0.38 | 14.17 |
| Diabetes without complication                                      | 20.64 | 0.76 | 13.54 | 30.98 | 1.14 | 23.59 | 29.45 | 1.08 | 26.18 | 26.69 | 0.98 | 36.69 |
| Pressure ulcers                                                    | 7.44  | 0.58 | 10.33 | 28.11 | 2.19 | 45.28 | 16.20 | 1.26 | 30.48 | 4.78  | 0.37 | 13.90 |
| Dementia                                                           | 12.34 | 0.51 | 9.10  | 47.13 | 1.95 | 40.30 | 30.43 | 1.26 | 30.38 | 13.10 | 0.54 | 20.23 |
| Malnutrition                                                       | 8.69  | 0.44 | 7.80  | 42.75 | 2.15 | 44.50 | 13.57 | 0.68 | 16.50 | 16.60 | 0.84 | 31.20 |
